# Supplementary material for: Protecting-group-free glycosylation of phosphatidic acid in aqueous media
Source: Royal Society of Chemistry journal article supplement (doi:10.1039/d2ob02173k), 2023-01-01

## Supporting Information

### Protecting group free glycosylation of phosphatidic acid in aqueous media

Koki Kano<sup>[a]</sup>, Nozomi Ishii<sup>[a]</sup>, Atsushi Miyagawa<sup>[b]</sup>, Hiroaki Takeda<sup>[c]</sup>, Yoshio Hirabayashi<sup>[c, d]</sup>, Hiroyuki Kamiguchi<sup>[c]</sup>, Peter Greimel<sup>[c]\*</sup>, and Ichiro Matsuo<sup>[a]\*</sup>

[a]. Graduate School of Science and Technology, Gunma University, 1-5-1, Tenjin-cho, Kiryu, Gunma 376-8515 (Japan)

[b]. Department of materials Science and Engineering, Department of Life Science and Applied Chemistry, Nagoya Institute of Technology, Gokiso-cho, Showa-ku, Nagoya, Aichi, 466-8555 (Japan)

[c]. RIKEN Center for Brain Science, Wako, Saitama 351-0198 (Japan)

[d]. Institute for Environmental and Gender-Specific Medicine, Juntendo University Graduate School of Medicine, Urayasu, Chiba 279-0021 (Japan)

# Table of Contents

## 1. <sup>1</sup>H-NMR, 1D-TOCSY, and LC-MS analysis of the reaction mixture of 2

## 2. LCMS analysis of DMC mediated coupling reaction

- 2-1. Solvent effect on coupling reaction (**Figure S1** for Table 1).
- 2-2. Solvent effect on coupling reaction for the synthesis of PtdGlc (**4**) analyzed by supercritical fluid chromatography triple quadrupole mass spectrometry (SFC/QqQMS) (**Figure S2** for Table 2).
- 2-3. Stepwise addition of DMC and D-glucose (**Figure S3** for Figure 1).
- 2-4. Synthesis of PtdGlc derivatives (**Figure S4** for Table 3).

## 3. Experimental procedure

- 3-1. General information
- 3-2. Synthesis of triethylammonium (*R*)-(2,2-dimethyl-1,3-dioxolan-4-yl)methyl hydrogen phosphate: **1**
- 3-3. Synthesis of PA(18:0/18:0): **5**
- 3-4. Synthesis of PA(18:1/18:1): **7**
- 3-5. Synthesis of PA(18:0/16:0): **9**
- 3-6. Synthesis of PA (16:0/18:0): **11**
- 3-7. Synthesis of PA (16:0/16:0): **13**
- 3-8. Synthesis of 2,2-dimethyl-1,3-dioxolan-4-ylmethyl phosphatidyl glucoside (**3**)
- 3-9. Synthesis of PtdGlc (18:0/20:0): **4**
- 3-10. Synthesis of phosphatidyl glucoside: PtdGlc (**4**) by stepwise addition of DMC and glucose.
- 3-11. Synthesis of PtdGlc (18:0/18:0): **6**
- 3-12. Synthesis of PtdGlc (18:1/18:1): **8**
- 3-13. Synthesis of PtdGlc (18:0/16:0): **10**
- 3-14. Synthesis of PtdGlc (16:0/18:0): **12**
- 3-15. Synthesis of PtdGlc (16:0/16:0): **14**
- 3-16. Synthesis of <sup>13</sup>C-labeled phosphatidyl glucoside (U-<sup>13</sup>C<sub>6</sub>): **15**

## 4. <sup>1</sup>H, <sup>13</sup>C, and <sup>31</sup>P NMR spectra of synthetic compounds:

PA derivatives (**1**, **5**, **7**, **9**, **11**, and **13**)

PtdGlc derivatives (**2**, **4**, **6**, **8**, **10**, **12**, **14**, and **15**),

# 1. <sup>1</sup>H-NMR, 1D-TOCSY, and LC-MS analysis of reaction mixture 2

## 1-1. <sup>1</sup>H-NMR and 1D-TOCSY spectra of reaction mixture 2

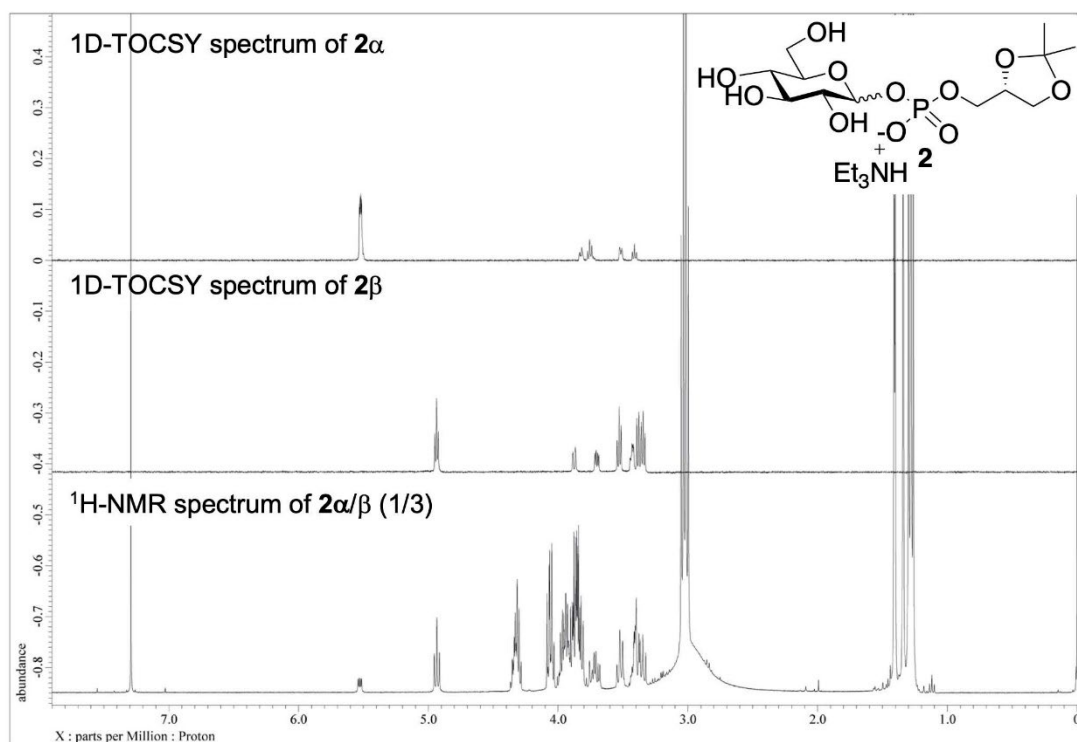

## 1-2. <sup>1</sup>H-NMR and 1D-TOCSY spectra of reaction mixture 2 (expansion of pyranose ring region)

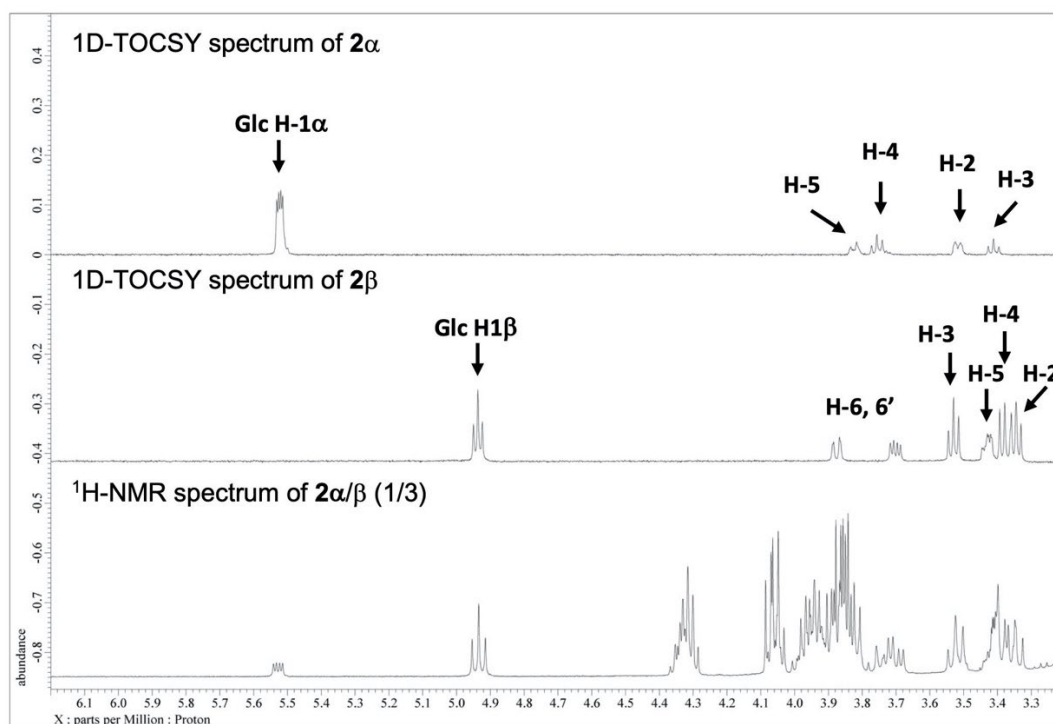

### 1-3. LC-MS analysis of reaction mixture 2

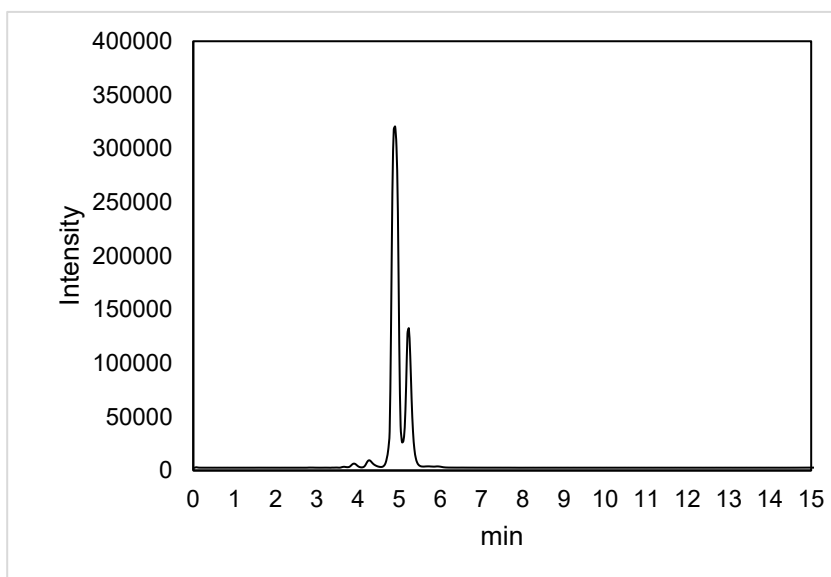

**Analytical conditions:** solvent system A: 5 mM ammonium formate in water pH4, solvent system B: 5 mM ammonium formate in water/acetonitrile = 5/95 v/v pH4, solvent B = 80% isocratic, column: TOSOH Amide 80, 2.0 mm I.D. x 15 cm 3  $\mu$ m, flow rate: 200  $\mu$ L/min, Oven temperature: 40  $^{\circ}$ C, Ionization mode: ESI negative, The MS detector was run in SIM mode, m/z = 373.10, 358.10 and 387.10, sample: The reaction mixture was diluted with 2,500 times by mixed solvent (solvent A/B=30/70) and injected 3  $\mu$ L.



## 2. LCMS analysis of DMC mediated coupling reaction

### 2-1. Solvent effect on coupling reaction (for Table 1 entry1-15)

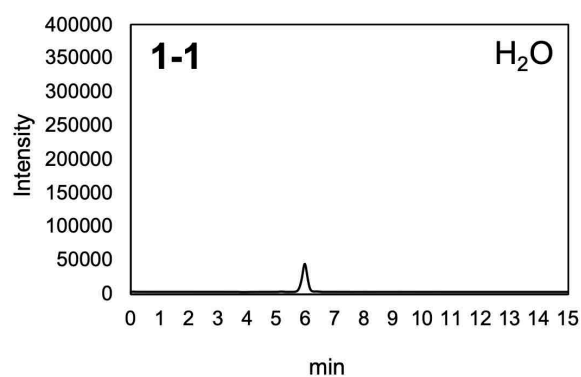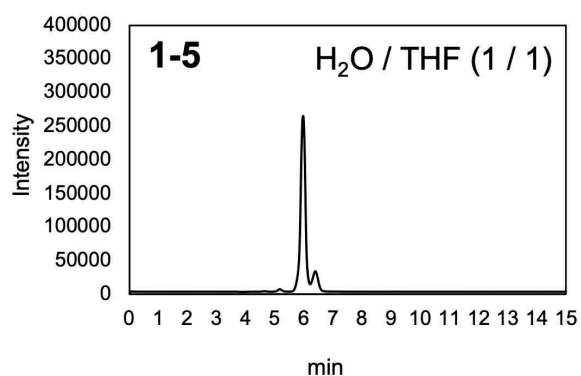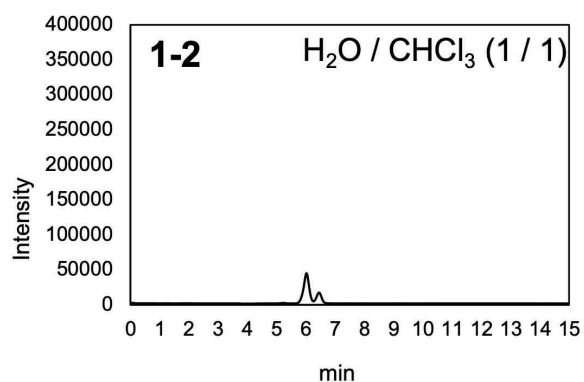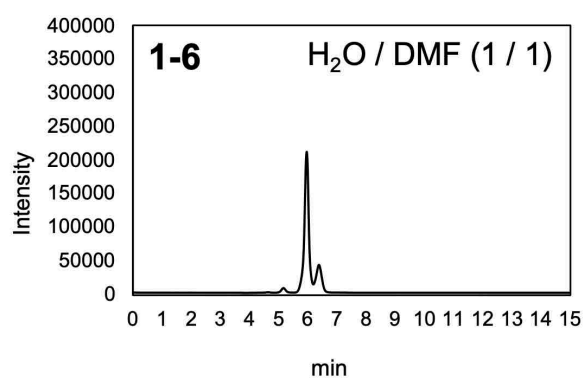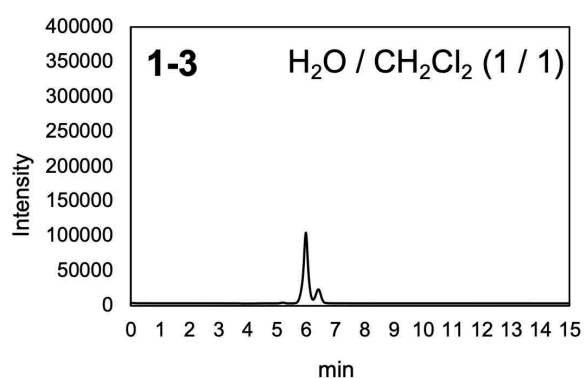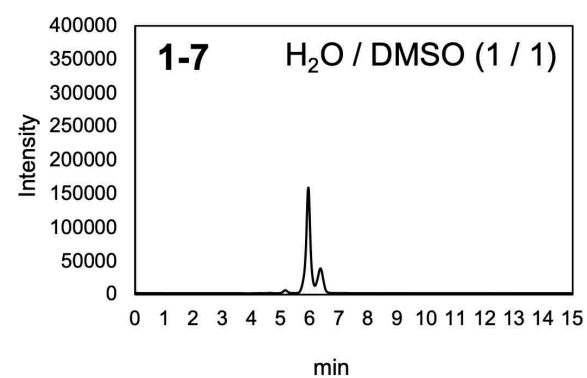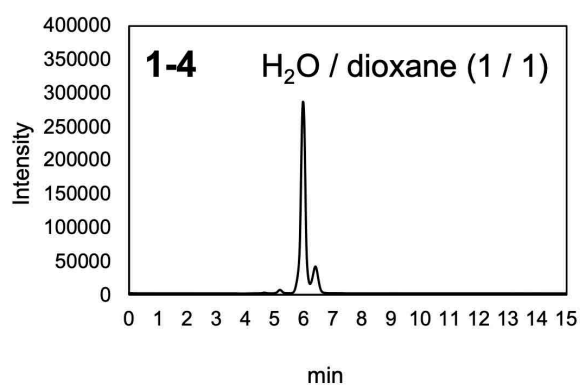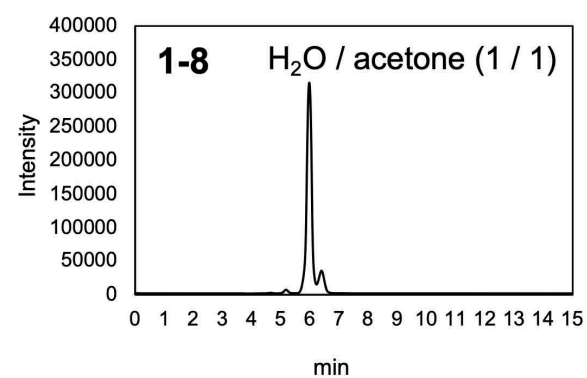

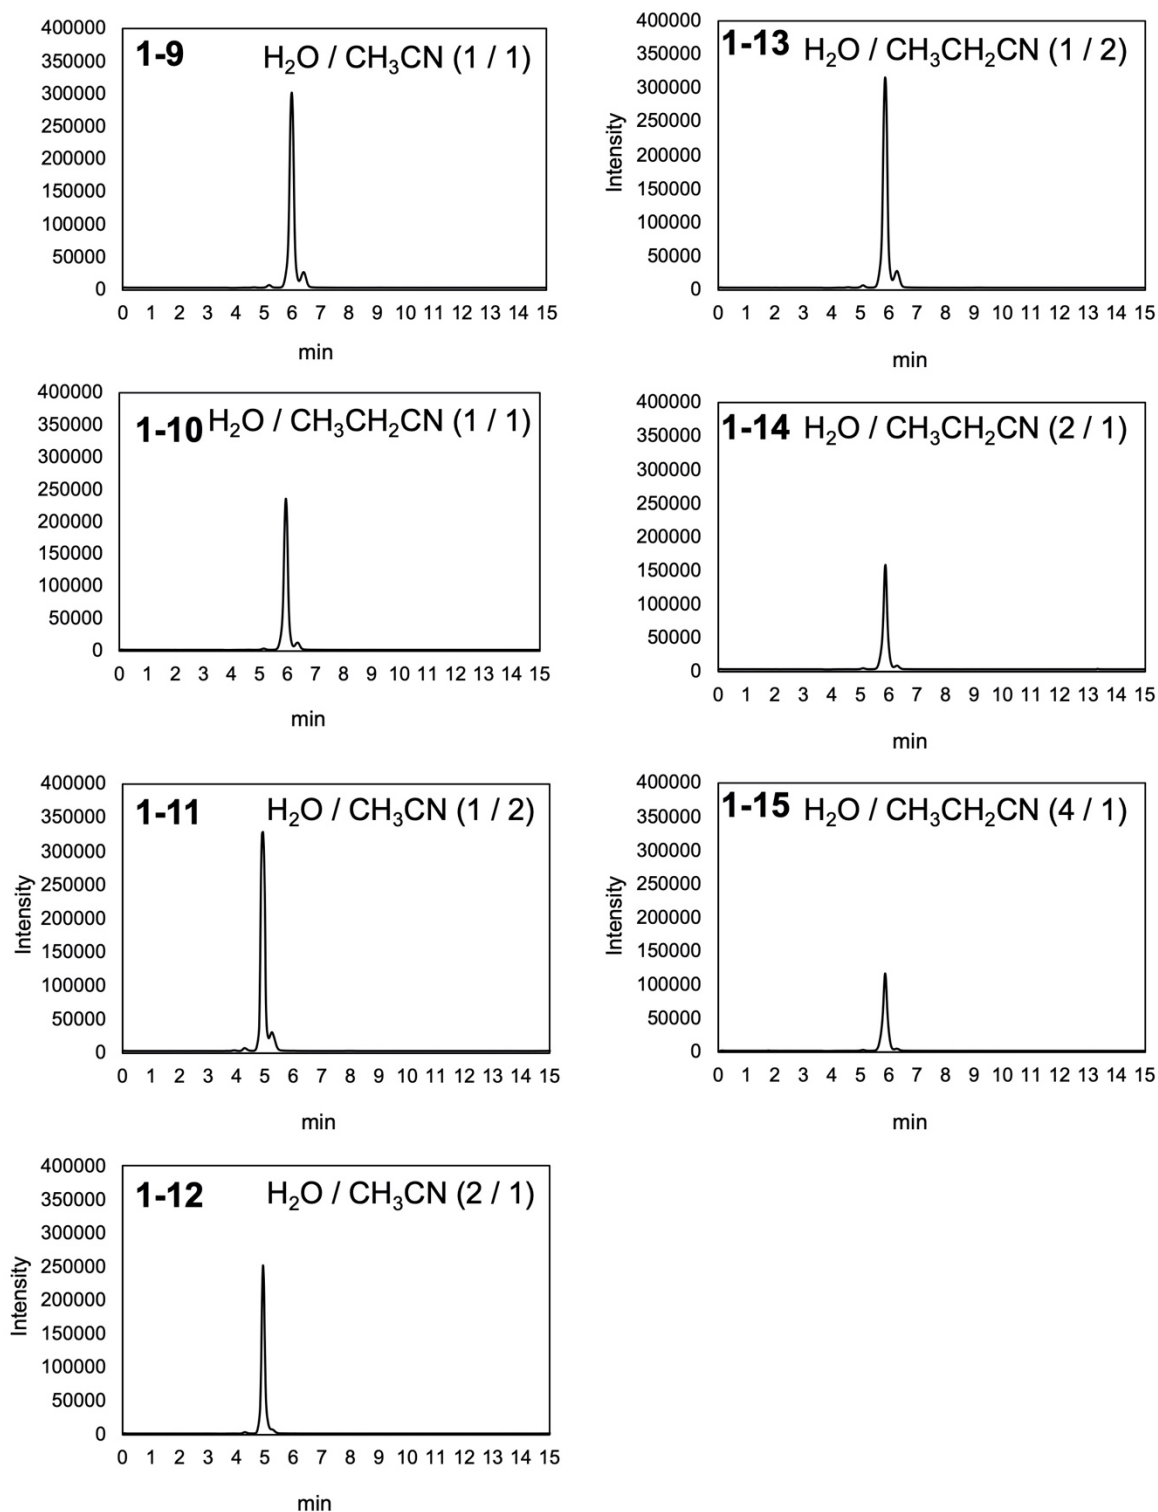

**Analytical conditions:** solvent system A: 5 mM ammonium formate in water pH 4, solvent system B: 5 mM ammonium formate in water/acetonitrile = 5/95 v/v, pH 4, solvent B = 80% isocratic, column: TOSOH Amide 80 3  $\mu\text{m}$ , 2.0 mmI.D. x 15 cm, flow rate: 200  $\mu\text{L}/\text{min}$ , column oven temperature: 40  $^{\circ}\text{C}$ , Ionization mode: ESI negative, The MS detector was run in SIM mode,  $m/z = 373.10$ , sample: The reaction mixture was diluted with 500 times by mixed solvent (solvent A/B=30/70) and injected 3  $\mu\text{L}$ .

**Figure S1**

2-1-2. Solvent effect on coupling reaction (for Table 1 entry16-19)

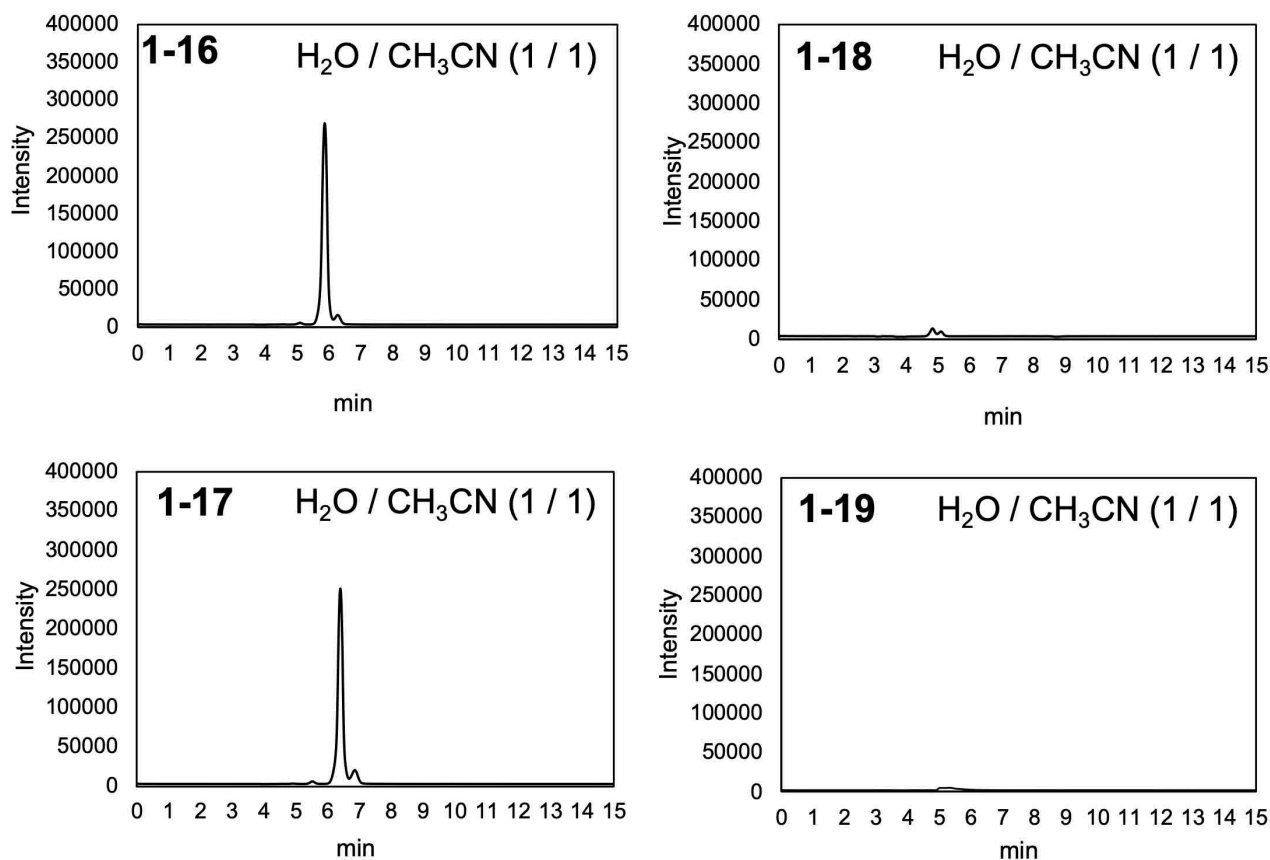

**Analytical conditions:** solvent system A: 5 mM ammonium formate in water pH 4, solvent system B: 5 mM ammonium formate in water/acetonitrile = 5/95 v/v, pH 4, solvent B = 80% isocratic, column: TOSOH Amide 80 3  $\mu\text{m}$ , 2.0 mm I.D. x 15 cm, flow rate: 200  $\mu\text{L}/\text{min}$ , column oven temperature: 40  $^\circ\text{C}$ , Ionization mode: ESI negative, The MS detector was run in SIM mode,  $m/z = 373.10$  for entry 16,17,  $m/z = 357.10$  for entry 18, and  $m/z = 387.10$  for entry 19, sample: The reaction mixture was diluted with 500 times by mixed solvent (solvent A/B=30/70) and injected 3  $\mu\text{L}$ .

Figure S2

**2-2.** Solvent effect on coupling reaction for the synthesis of PtdGlc (**4**) analyzed by supercritical fluid chromatography triple quadrupole mass spectrometry (SFC/QqQMS).

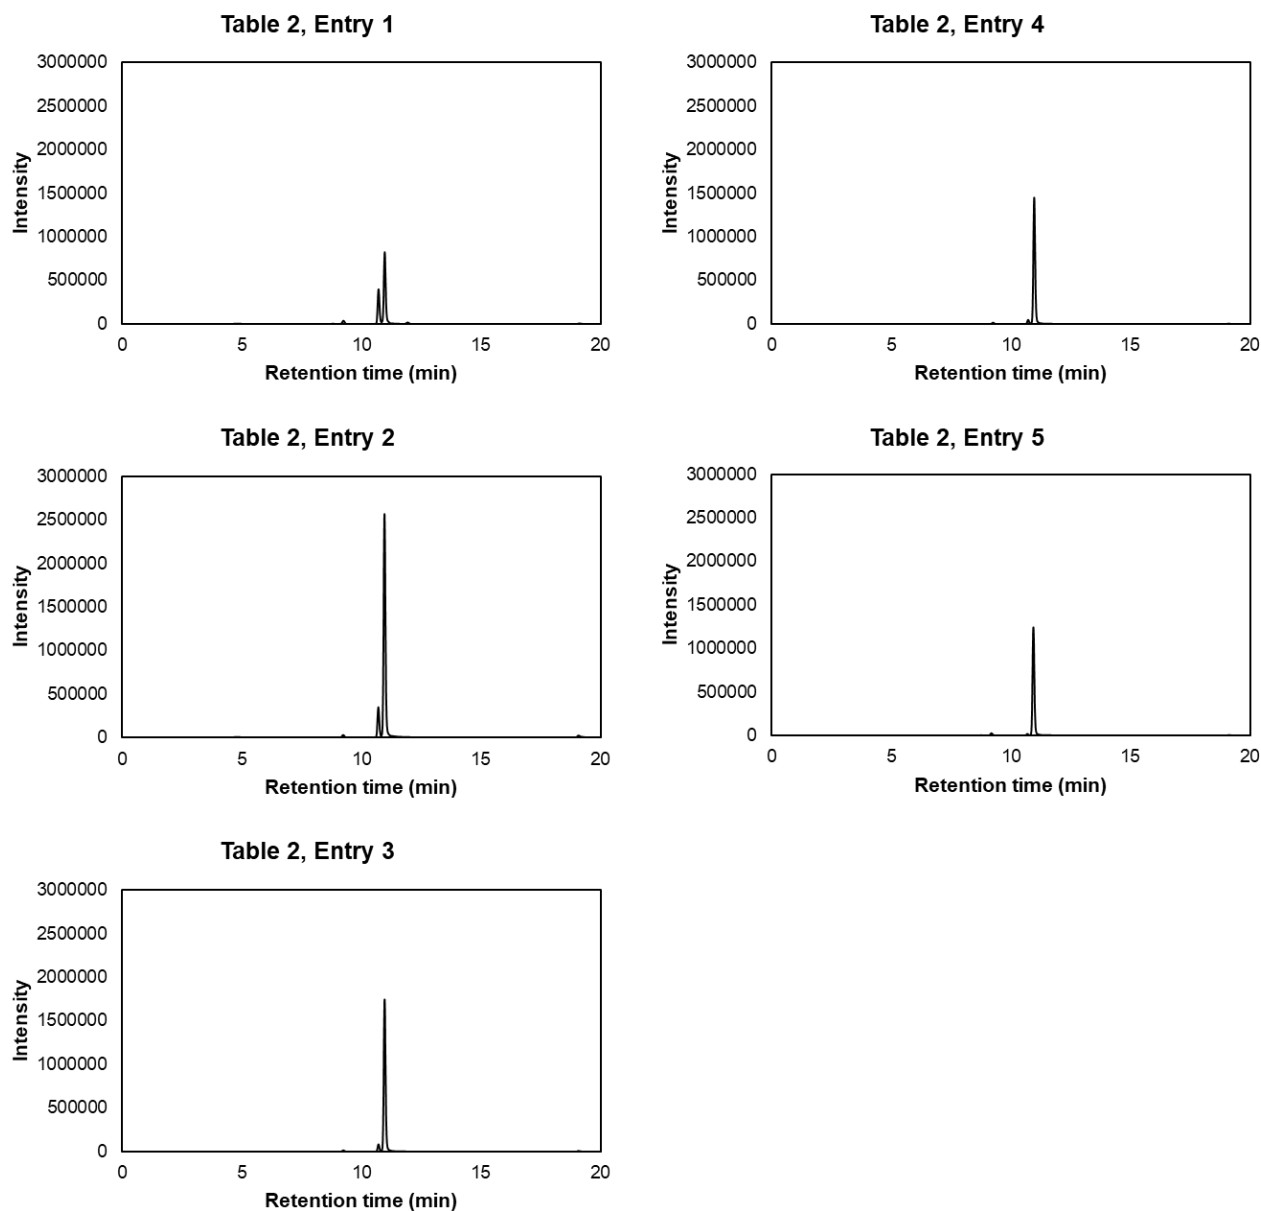

**Analytical conditions:** Analytical conditions: mobile phase A: CO<sub>2</sub>, mobile phase B: 0.1% w/v ammonium acetate in MeOH/H<sub>2</sub>O = 95/5 v/v, mobile phase B = 1% (0-1 min), 1-65% (1-12 min), 65% (12-18 min), 65-1% (18-18.1min), 1% (18.1-20min), column: Waters Torus DEA, 1.7  $\mu$ m, 3.0 mm I.D. x 10 cm, flow rate: 1 mL/min, Oven temperature: 50 °C, back pressure: 10 MPa, ionization mode: ESI negative, The MS/MS detector was run in MRM mode, m/z = 893.5 > 283.2, sample: The reaction mixture was diluted with 50,000 times by MeOH and injected 1  $\mu$ L.

**Figure S3**

**2-3.** Stepwise addition of DMC and glucose (for Figure 1).

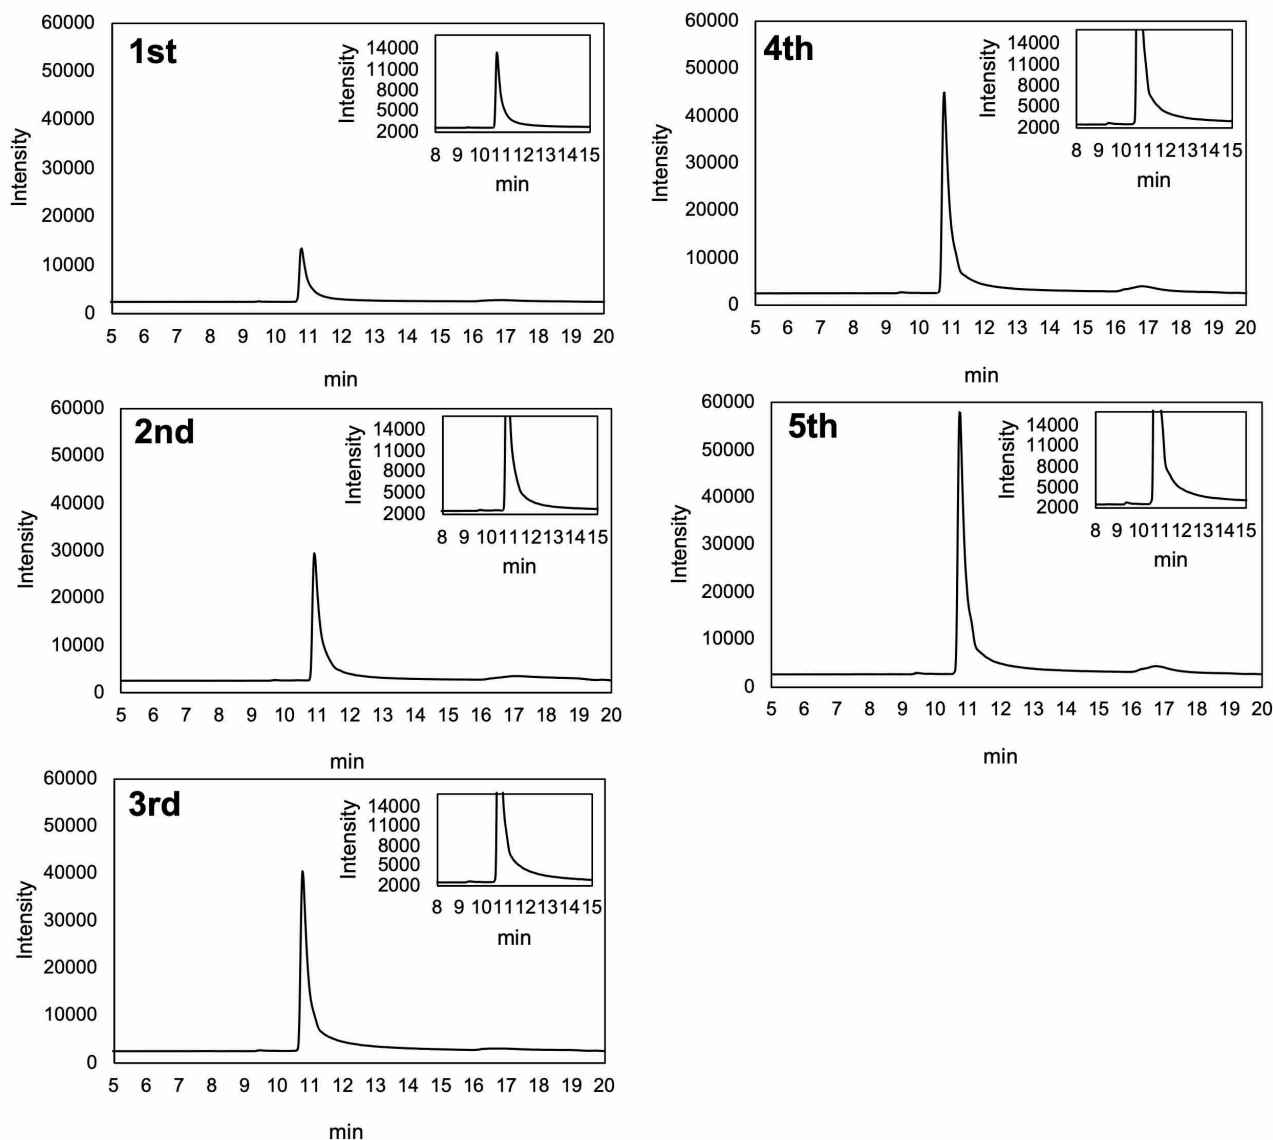

**Analytical conditions:** solvent system A: 5 mM ammonium formate in water/methanol/acetonitrile = 1/3/96 v/v pH 7, solvent system B: 20 mM ammonium formate in water/methanol = 10/90 v/v pH 7, solvent B = 0-20% gradient, 15min, column: Waters BEH Amide 2.1 mm I.D. x 15 cm, 1.7  $\mu$ m, flow rate: 600  $\mu$ L/min, Oven temperature: 40  $^{\circ}$ C, Ionization mode: ESI negative, The MS detector was run in SIM mode,  $m/z$  = 893.61, sample: The reaction mixture was diluted with 500 times by mixed solvent (solvent A/B=30/70) and injected 3  $\mu$ L.

**Figure S4**

**2-4. Synthesis of PtdGlc derivatives (for Table 3).**

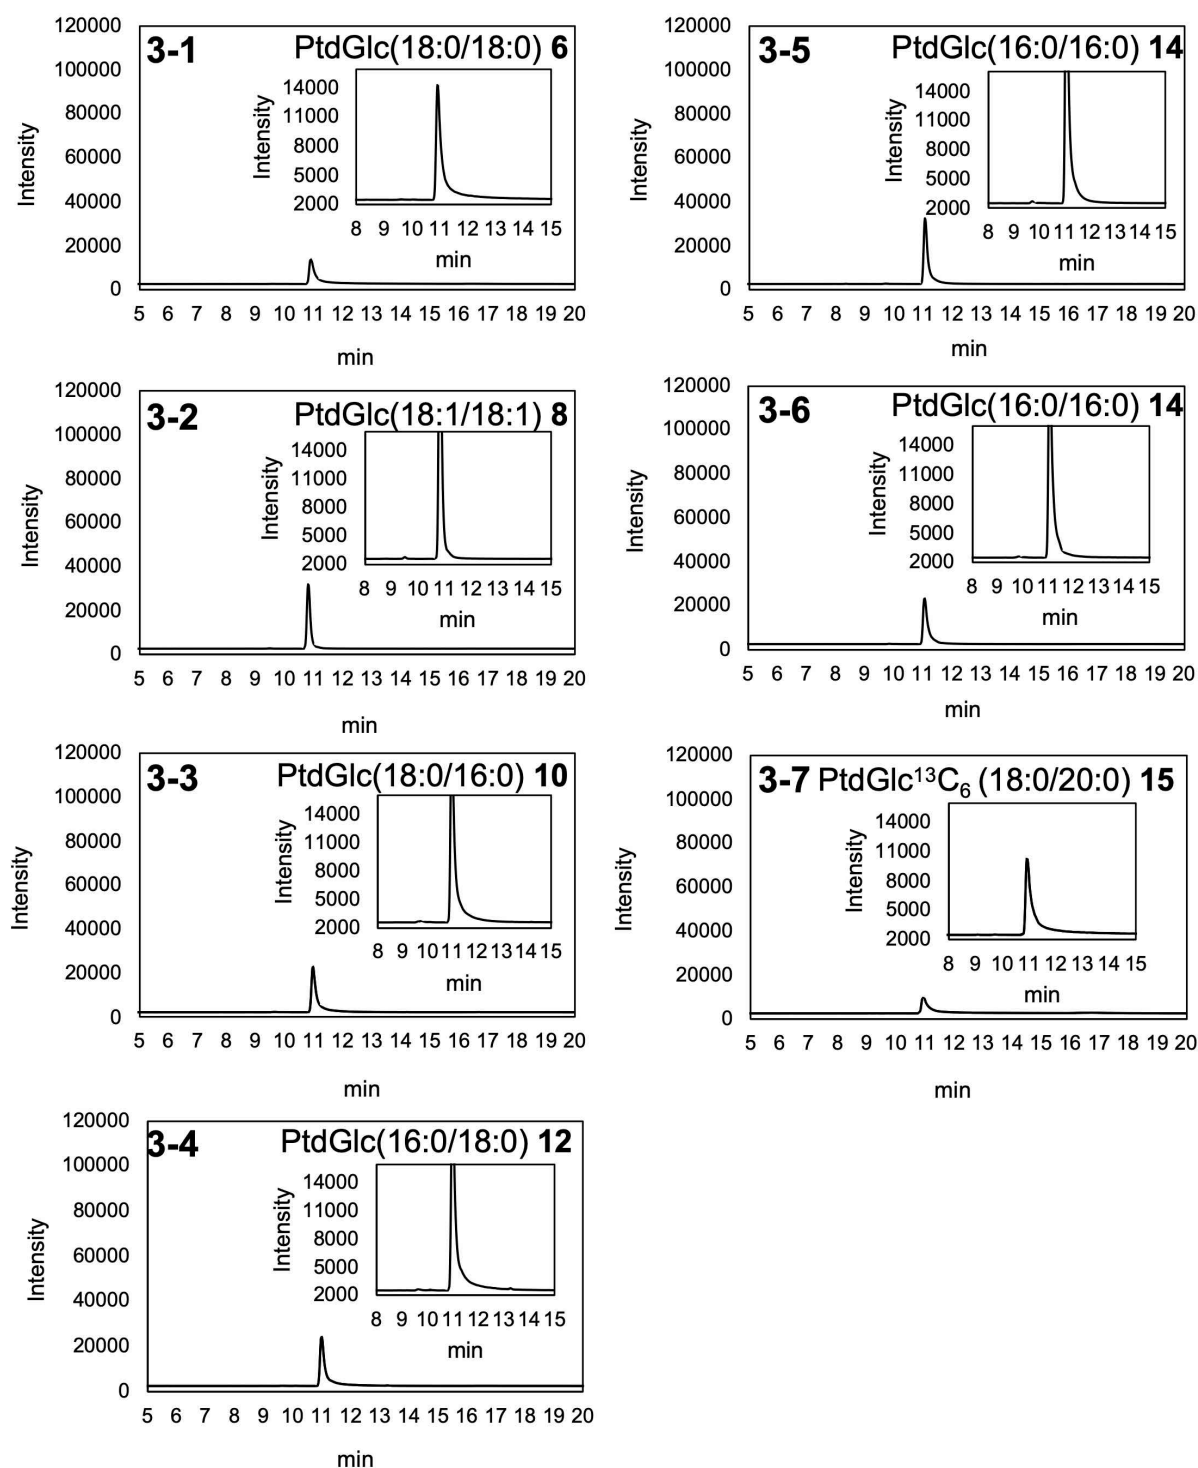

**Analytical conditions:** solvent system A: 5 mM ammonium formate in water/methanol/acetonitrile = 1/3/96 v/v, pH 7, solvent system B: 20 mM ammonium formate in water/methanol = 10/90 v/v, pH 7, solvent B = 0-20% gradient, 15min, column: Waters BEH Amide 2.1 mm I.D. x 15 cm, 1.7  $\mu$ m, flow rate: 600  $\mu$ L/min, Oven temperature: 40  $^{\circ}$ C, Ionization mode: ESI negative, The MS detector was run in SIM mode, m/z = 865.58 for entry 1, 861.54 for entry 2, 850.55 for entry 3 and 4, 809.52 for entry 5-7, and 837.55 for entry 8, sample: The reaction mixture was diluted with 50,000 times by MeOH and injected 1  $\mu$ L.

**Figure S5**

### 3. Experimental Procedure

#### 3-1. General information

All reactions sensitive to moisture were carried out under anhydrous conditions using argon atmosphere and anhydrous solvents, unless stated otherwise. Solvents and other reagents were purchased from Kanto Chemical Co., Inc (Tokyo, Japan), Tokyo Chemical Industry (Tokyo, Japan) and Wako Pure Chemical Industries Ltd. (Tokyo, Japan) and used without further purification. 1,2-di-*O*-palmityl-*sn*-glycerol-3-phosphate sodium salt was purchased from Sigma-Aldrich-Merck (Darmstadt, Germany). Analytical thin layer chromatography was developed on TLC Silica gel 60 F<sub>254</sub> plate (Merck, Darmstadt, Germany). Silica gel column chromatography was performed on Silica gel 60 N (40–100 mesh or 100–210 mesh, Kanto Chemical Co., Inc, Tokyo, Japan), Hi-Flash column (YAMAZEN, Osaka, Japan), or Iatrobeads 6RS-8060 Mitsubishi Chemical Medience Co., Tokyo, Japan). High-performance liquid chromatograph (HPLC) was performed on a Shimadzu Prominence HPLC system equipped with a UV detector SPD-20A (Shimadzu Co., Ltd., Kyoto, Japan). ESI-MS were recorded in negative ion mode on an LCMS-2020 equipped with a Nexera X2 HPLC system (Shimadzu Co., Ltd., Kyoto, Japan). MALDI-TOF MS were recorded in high-resolution mode with positive or negative ion mode, as indicated, on an AXIMA-Performance (Shimadzu Co., Ltd., Kyoto, Japan). High-resolution mass spectrometry was performed on a Waters Synapt G2-S HDMS spectrometer. NMR spectra were recorded with a JEOL ECA-600 spectrometer (JEOL, Tokyo, Japan; <sup>1</sup>H: 600 MHz, <sup>13</sup>C: 150 MHz, <sup>31</sup>P: 243 MHz). <sup>1</sup>H NMR spectra were referenced to TMS (0.00 ppm), <sup>13</sup>C NMR spectra were referenced to the central peak of CDCl<sub>3</sub> (77.16 ppm) and <sup>31</sup>P NMR spectra were referenced to 85% H<sub>3</sub>PO<sub>4</sub> (0.00 ppm). The relative alpha anomer content was determined as the respective integral ratio (R) of the anomeric signals in the <sup>1</sup>H NMR spectrum. The signal to noise ratio (SNR) of each signal was calculated with Delta software (JEOL). The relative uncertainty of the ratio R (ΔR/R) was estimated according to

$$\frac{\Delta R}{R} = \sqrt{\left(\frac{1}{SNR_A}\right)^2 + \left(\frac{1}{SNR_B}\right)^2}$$

where  $SNR_A$  and  $SNR_B$  are the signal to noise ratio of the alpha and beta anomeric signals respectively. The lower limit of detection was defined as  $SNR > 3$ . <sup>1</sup>H NMR signals marked with a triangle are derived from LH20.

### 3-2. Synthesis of triethylammonium (*R*)-(2,2-dimethyl-1,3-dioxolan-4-yl)methyl hydrogen phosphate: **1**

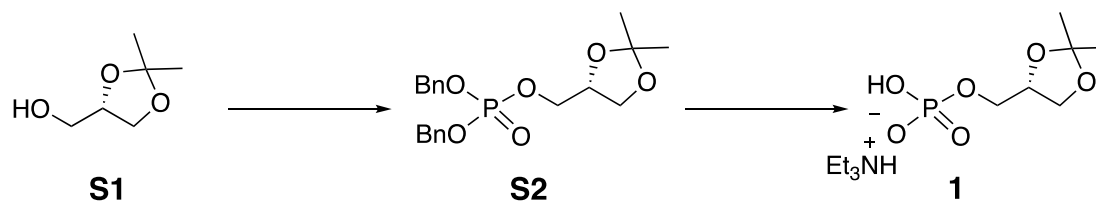

#### 3-2-1. dibenzyl [(*R*)-2,2-dimethyl-1,3-dioxolan-4-yl]methyl phosphate: **S2**

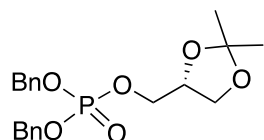

To a solution of (*S*)-(+)-(2,2-dimethyl-1,3-dioxolan-4-yl)methanol **S1** (250 mg, 1.89 mmol) in 19 mL of dry  $\text{CH}_2\text{Cl}_2$  was added dibenzyl diisopropylphosphoramidite (1.89 mL, 1.96 g, 5.67 mmol) and 1*H*-tetrazole (469 mg, 6.69 mmol) at 0 °C and stirred at 25 °C for 30 min. The reaction mixture was cooled to 0 °C and treated with 2 mL of 35% aq.  $\text{H}_2\text{O}_2$  and subsequently warmed to 25 °C and stirred for 30 min. The resulting mixture was diluted with  $\text{CHCl}_3$  and washed with saturated aq.  $\text{NaHCO}_3$ , and brine. The organic layer was dried over anhydrous  $\text{MgSO}_4$ , filtered, and concentrated *in vacuo*. The resulting residue was purified by flash silica gel column chromatography with hexane/EtOAc (100/0 to 1/100, v/v) to give **S2** (618 mg, 1.57 mmol, 83% in 2 steps);  $R_f$  = 0.20 (hexane/EtOAc = 2/1);  $^1\text{H}$  NMR (600 MHz,  $\text{CDCl}_3$ )  $\delta$  7.38-7.32 (m, 10H, Ar), 5.09-5.02 (m, 4H,  $-\text{CH}_2\text{Ph}$ ), 4.23-4.19 (m, 1H, *sn*-2), 4.02-3.97 (m, 2H, *sn*-3<sub>a</sub>, *sn*-1<sub>a</sub>), 3.94-3.91 (m, 1H, *sn*-3<sub>b</sub>), 3.74-3.72 (m, 1H, *sn*-1<sub>b</sub>), 1.38 (s, 3H,  $-\text{C}(\text{CH}_3)_2$ ), 1.33 (s, 3H,  $-\text{C}(\text{CH}_3)_2$ );  $^{13}\text{C}$  NMR (150 MHz,  $\text{CDCl}_3$ )  $\delta$  135.86, 135.81 (*ipso*), 128.74, 128.14 (Ar), 109.97 ( $-\text{C}(\text{CH}_3)_2$ ), 74.05 (d,  $^3J_{\text{CP}}$  = 8.7 Hz, *sn*-2), 69.57 (d,  $^2J_{\text{CP}}$  = 5.7 Hz,  $-\text{CH}_2\text{Ph}$ ), 67.58 (d,  $^2J_{\text{CP}}$  = 5.7 Hz, *sn*-3), 66.25 (*sn*-1), 26.84 ( $-\text{C}(\text{CH}_3)_2$ ), 25.38 ( $-\text{C}(\text{CH}_3)_2$ );  $^{31}\text{P}$  NMR (243 MHz,  $\text{CDCl}_3$ )  $\delta$  -0.43 ppm; MALDI-TOF MS calcd for  $\text{C}_{20}\text{H}_{25}\text{NaO}_6\text{P}$   $[\text{M}+\text{Na}]^+$   $m/z$  415.13,  $\text{C}_{20}\text{H}_{25}\text{KO}_6\text{P}$   $[\text{M}+\text{K}]^+$   $m/z$  431.10, found  $m/z$  415.62, 431.63.

#### 3-2-2. (*R*)-(2,2-dimethyl-1,3-dioxolan-4-yl)methyl hydrogen phosphate triethylammonium salt: **1**

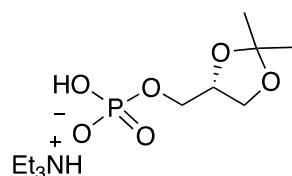

A suspension of 10% Pd/C catalyst (256 mg) in 30 mL of EtOH containing the compound **S2** (618 mg, 1.57 mmol) was stirred at 35 °C for 11 h under a hydrogen atmosphere. Subsequently, TEA (240  $\mu\text{L}$ ) was added at 0 °C and the resulting mixture was stirred for 1 h. The suspension was filtered over a bed of Celite, and the filtrate was concentrated *in vacuo*. The residue was purified by silica gel column chromatography (Iatrobeads 6RS-8060 No.1104) with  $\text{CHCl}_3/\text{MeOH}/\text{H}_2\text{O}/\text{TEA}$  (100/0/0/1, 89/11/0/0.2, 80/20/0/0.2, 67/33/5/0.2, v/v) to give **1** (460 mg, 1.47 mmol, 93%);  $R_f$  = 0.50 ( $\text{CHCl}_3/\text{MeOH}$  = 1/1, 1% TEA);  $^1\text{H}$  NMR (600 MHz,  $\text{CDCl}_3$ ,  $\text{CD}_3\text{OD}$  3%)  $\delta$  4.34-4.30 (m, 1H, *sn*-2), 4.08-4.06 (m, 1H, *sn*-1<sub>a</sub>), 3.99-3.95 (m, 1H, *sn*-3<sub>a</sub>), 3.87-3.84 (m, 2H, *sn*-1<sub>b</sub>, *sn*-3<sub>b</sub>), 3.10-3.06 (m, 6H,



N-(CH<sub>2</sub>-CH<sub>3</sub>)<sub>3</sub>, 1.40 (s, 3H, -C(CH<sub>3</sub>)<sub>2</sub>), 1.34 (s, 3H, -C(CH<sub>3</sub>)<sub>2</sub>), 1.31 (t, 9H, *J* = 7.2 Hz, *J* = 7.2 Hz, N-(CH<sub>2</sub>-CH<sub>3</sub>)<sub>3</sub>); <sup>13</sup>C NMR (150 MHz, CDCl<sub>3</sub>, CD<sub>3</sub>OD 3%) δ 109.26 (-C(CH<sub>3</sub>)<sub>2</sub>), 74.87 (d, <sup>3</sup>*J*<sub>CP</sub> = 8.6 Hz, *sn*-2), 67.20 (*sn*-1), 65.84 (d, <sup>2</sup>*J*<sub>CP</sub> = 5.9 Hz, *sn*-3), 45.60 (N-(CH<sub>2</sub>-CH<sub>3</sub>)<sub>3</sub>), 26.97 (-C(CH<sub>3</sub>)<sub>2</sub>), 25.54 (-C(CH<sub>3</sub>)<sub>2</sub>), 8.63 (N-(CH<sub>2</sub>-CH<sub>3</sub>)<sub>3</sub>); <sup>31</sup>P NMR (243 MHz, CDCl<sub>3</sub>, CD<sub>3</sub>OD 3%) δ 2.00 ppm; ESI MS calcd for C<sub>6</sub>H<sub>12</sub>O<sub>6</sub>P [M-NHEt<sub>3</sub>]<sup>-</sup> *m/z* 211.04, found *m/z* 211.08.; HRMS calcd for [C<sub>6</sub>H<sub>12</sub>O<sub>6</sub>P]<sup>-</sup> requires *m/z* 211.0376; found 211.0369.

### 3-3. Synthesis of PA(18:0/18:0): 5

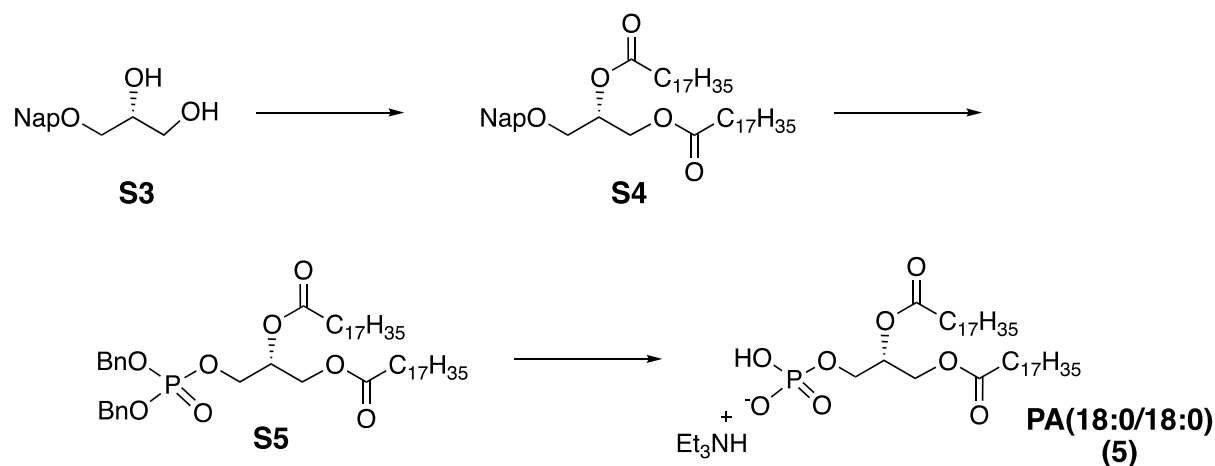

#### 3-3-1. 1, 2-di-O-stearoyl-3-O-(2-naphthylmethyl)-sn-glycerol: S4

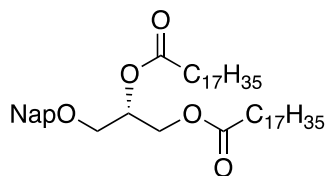

A mixture of 3-O-(2-Naphthylmethyl)-sn-glycerol [Ref S1] (S3) (104 mg, 448 μmol), stearic acid (277 mg, 974 μmol) and DMAP (36 mg, 295 μmol) in dry CH<sub>2</sub>Cl<sub>2</sub> (13 mL) was treated with EDC (182 mg, 949 μmol) at 0 °C under argon. The mixture was warmed to 40 °C and stirred at 40 °C for 14 h. The reaction was quenched with CH<sub>3</sub>OH at 0 °C. The mixture was diluted with CH<sub>2</sub>Cl<sub>2</sub> and washed with 1 M HCl, brine, saturated aq. NaHCO<sub>3</sub>, and brine. The organic layer was dried over anhydrous MgSO<sub>4</sub>, filtered, and concentrated *in vacuo*. The resulting residue was purified by flash silica gel column chromatography with hexane/EtOAc (100/0 to 87/13, v/v) to give S4 (261 mg, 341 μmol, 76%); *R<sub>f</sub>* = 0.58 (hexane/EtOAc = 5/1); <sup>1</sup>H NMR (600 MHz, CDCl<sub>3</sub>) δ 7.83-7.43 (m, 7H, Ar), 5.28-5.25 (m, 1H, *sn*-2), 4.73-4.67 (m, 2H, -CH<sub>2</sub>Nap), 4.37-4.35 (m, 1H, *sn*-1<sub>a</sub>), 4.22-4.19 (m, 1H, *sn*-1<sub>b</sub>), 3.65-3.60 (m, 2H, *sn*-3), 2.32 (t, 2H, *J* = 7.8 Hz, *J* = 7.8 Hz, FA), 2.24 (t, 2H, *J* = 7.2 Hz, *J* = 7.8 Hz, FA), 1.63-1.54 (m, 4H, FA), 1.35-1.25 (m, 56H, FA), 0.88 (t, 6H, *J* = 6.6 Hz, *J* = 7.2 Hz, FA); <sup>13</sup>C NMR (150 MHz, CDCl<sub>3</sub>) δ 173.58, 173.29 (CO), 135.31, 133.35, 133.18, 128.41, 128.00, 127.85, 126.66, 126.32, 126.12, 125.73 (Ar), 73.56 (-CH<sub>2</sub>Nap), 70.15 (*sn*-2), 68.37 (*sn*-3), 62.77 (*sn*-1), 34.50, 34.26, 32.08, 29.86, 29.82, 29.79, 29.65, 29.52, 29.45, 29.43, 29.27, 25.11, 25.02, 22.84, 14.27 (FA) ppm; MALDI-TOF MS calcd for C<sub>50</sub>H<sub>84</sub>NaO<sub>5</sub> [M+Na]<sup>+</sup> *m/z* 787.62, C<sub>50</sub>H<sub>84</sub>KO<sub>5</sub> [M+K]<sup>+</sup> *m/z* 803.60, found *m/z* 788.27, 804.24.

### 3-3-2. 1,2-di-*O*-stearyl-3-*O*-di-*O*-benzylphosphate-*sn*-glycerol: **S5**

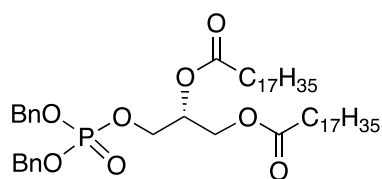

To a solution of compound **S4** (131 mg, 171  $\mu$ mol) in  $\text{CH}_2\text{Cl}_2/\text{H}_2\text{O}$  (9/1, 5 mL) was treated with DDQ (197 mg, 868  $\mu$ mol) at 0 °C and stirred at 25 °C for 1 h. The reaction mixture was diluted with  $\text{CHCl}_3$  and washed with water, saturated aq.  $\text{NaHCO}_3$ , and brine. The organic layer was dried over anhydrous  $\text{MgSO}_4$ , filtered, and concentrated *in vacuo*. The resulting residue was purified by flash silica gel column chromatography with hexane/EtOAc (100/0 to 83/17, v/v) to give a 1,2-di-*O*-stearyl-*sn*-glycerol. The crude diacyl glycerol was dissolved with  $\text{CH}_2\text{Cl}_2$  (1.4 mL) and treated with dibenzyl diisopropylphosphoramidite (141  $\mu$ L, 146 mg, 424  $\mu$ mol) and 1*H*-tetrazole (36 mg, 514  $\mu$ mol) at 0 °C and stirred at 25 °C for 30 min. The reaction mixture was cooled to 0 °C and treated with  $\text{H}_2\text{O}_2$  (35% aq., 250  $\mu$ L) and subsequently warmed to 25 °C and stirred for 30 min. The mixture was diluted with  $\text{CH}_2\text{Cl}_2$  and washed with saturated aq.  $\text{NaHCO}_3$ , and brine. The organic layer was dried over anhydrous  $\text{MgSO}_4$ , filtered, and concentrated *in vacuo*. The resulting residue was recrystallized from EtOH (16 mL) to give **S5** (134 mg, 152  $\mu$ mol, 89% in 3 steps);  $R_f$  = 0.34 (hexane/EtOAc = 3/1);  $^1\text{H}$  NMR (600 MHz,  $\text{CDCl}_3$ )  $\delta$  7.37-7.31 (m, 10H, Ar), 5.18-5.14 (m, 1H, *sn*-2), 5.07-5.00 (m, 4H,  $-\text{CH}_2\text{Ph}$ ), 4.26-4.24 (m, 1H, *sn*-1<sub>a</sub>), 4.14-4.06 (m, 3H, *sn*-3, *sn*-1<sub>b</sub>), 2.28-2.25 (m, 4H, FA), 1.61-1.55 (m, 4H, FA), 1.35-1.25 (m, 56H, FA), 0.88 (t, 6H,  $J$  = 7.2 Hz,  $J$  = 7.2 Hz, FA);  $^{13}\text{C}$  NMR (150 MHz,  $\text{CDCl}_3$ )  $\delta$  173.36, 172.96 (CO), 135.78, 135.72 (*ipso*), 128.77, 128.12 (Ar), 69.64 (d,  $^2J_{\text{CP}}$  = 5.7 Hz,  $-\text{CH}_2\text{Ph}$ ), 69.44 (d,  $^3J_{\text{CP}}$  = 7.2 Hz, *sn*-2), 65.52 (d,  $^2J_{\text{CP}}$  = 4.2 Hz, *sn*-3), 61.74 (*sn*-1), 34.28, 34.15, 32.08, 29.86, 29.82, 29.79, 29.64, 29.52, 29.43, 29.28, 29.23, 24.98, 24.96, 22.84, 14.27 (FA);  $^{31}\text{P}$  NMR (243 MHz,  $\text{CDCl}_3$ )  $\delta$  -0.49 ppm; MALDI-TOF MS calcd for  $\text{C}_{53}\text{H}_{89}\text{NaO}_8\text{P}$  [ $\text{M}+\text{Na}$ ] $^+$   $m/z$  907.62,  $\text{C}_{53}\text{H}_{89}\text{KO}_8\text{P}$  [ $\text{M}+\text{K}$ ] $^+$   $m/z$  923.59, found  $m/z$  908.83, 924.78.

### 3-3-3. Synthesis of PA (18:0/18:0): 1, 2-di-*O*-stearyl-*sn*-glycerol-3-phosphate triethylammonium salt (**5**)

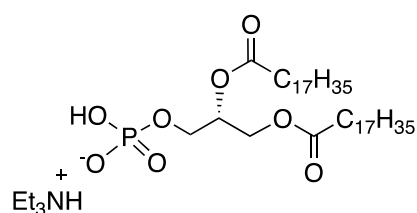

A suspension of 10% Pd/C catalyst (291 mg) in EtOAc/EtOH (5/1, 43.2 mL) containing compound **S5** (121 mg, 137  $\mu$ mol) was stirred at 35 °C for 24 h under a hydrogen atmosphere. Subsequently, the suspension was treated with TEA (21  $\mu$ L) and stirred for 1 h. The resulting suspension was filtered over a bed of Celite, and the filtrate was concentrated *in vacuo*. The residue was purified by silica gel column chromatography (Iatrobeads 6RS-8060 No.1104) with  $\text{CHCl}_3/\text{MeOH}/\text{H}_2\text{O}/\text{TEA}$  (100/0/0/1 to 89/11/0/0.2, 80/20/0/0.2, 67/33/5/0.2 v/v) to give **6** (81.1 mg, 101  $\mu$ mol, 74%);  $R_f$  = 0.31 ( $\text{CHCl}_3/\text{MeOH}$  = 5/1, 1% TEA);  $^1\text{H}$  NMR (600 MHz,  $\text{CDCl}_3$ ,  $\text{CD}_3\text{OD}$  3%)  $\delta$  5.25-5.22 (m, 1H, *sn*-2), 4.39-4.37 (m, 1H, *sn*-1<sub>a</sub>), 4.20-4.17 (m, 1H, *sn*-1<sub>b</sub>), 4.02-4.01 (m, 2H, *sn*-3), 3.13-3.09 (m, 6H, N- $(\text{CH}_2-\text{CH}_3)_3$ ), 2.32-2.28 (m, 4H, FA), 1.62-1.65 (m, 4H, FA), 1.38 (t, 9H,  $J$  = 7.2 Hz,  $J$  = 7.2 Hz, N- $(\text{CH}_2-\text{CH}_3)_3$ ), 1.31-1.25 (m, 56H, FA), 0.88 (t, 6H,  $J$  = 7.2 Hz,  $J$  = 7.2 Hz, FA);  $^{13}\text{C}$  NMR (150 MHz,

CDCl<sub>3</sub>, CD<sub>3</sub>OD 3%)  $\delta$  173.76, 173.38 (CO), 70.36 (d,  $^3J_{CP}$  = 7.2 Hz, *sn*-2), 63.54 (d,  $^2J_{CP}$  = 4.2 Hz, *sn*-3), 62.69 (*sn*-1), 45.91 (N-(CH<sub>2</sub>-CH<sub>3</sub>)<sub>3</sub>), 34.32, 34.17, 32.00, 29.78, 29.74, 29.60, 29.44, 29.40, 29.23, 24.96, 24.93, 22.76, 14.17 (FA), 8.57 (N-(CH<sub>2</sub>-CH<sub>3</sub>)<sub>3</sub>);  $^{31}\text{P}$  NMR (243 MHz, CDCl<sub>3</sub>, CD<sub>3</sub>OD 3%)  $\delta$  0.30 ppm; MALDI-TOF MS calcd for C<sub>39</sub>H<sub>77</sub>NaO<sub>8</sub>P [M+Na]<sup>+</sup> *m/z* 727.53, C<sub>39</sub>H<sub>76</sub>Na<sub>2</sub>O<sub>8</sub>P [M-H+Na<sub>2</sub>]<sup>+</sup> *m/z* 749.51, C<sub>39</sub>H<sub>76</sub>KNaO<sub>8</sub>P [M-H+KNa]<sup>+</sup> *m/z* 765.48, found *m/z* 728.29, 750.29, 766.33. ; HRMS calcd for [C<sub>39</sub>H<sub>76</sub>O<sub>8</sub>P]<sup>-</sup> requires *m/z* 703.5283; found 703.5265.

### 3-4. Synthesis of PA(18:1/18:1): 7

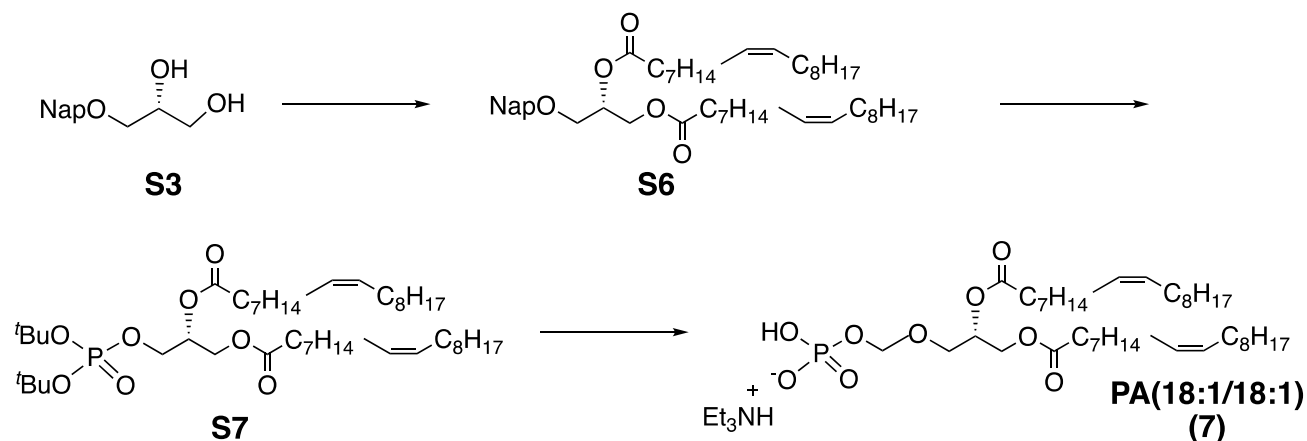

#### 3-4-1. Synthesis of 1,2-di-*O*-oleyl-3-*O*-(2-naphtylmethyl)-*sn*-glycerol: S6

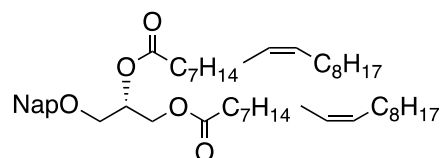

**S3** (100 mg, 431  $\mu\text{mol}$ ), oleic acid (280 mg, 991  $\mu\text{mol}$ ) and DMAP (38 mg, 300  $\mu\text{mol}$ ) were dissolved in dry CH<sub>2</sub>Cl<sub>2</sub> (13 mL) under argon and treated with EDC (220 mg, 1.15 mmol) at 0 °C. The reaction mixture was warmed to 40 °C and stirred at 40 °C for 14 h. Subsequently, the reaction was quenched with CH<sub>3</sub>OH at 0 °C. The mixture was diluted with CH<sub>2</sub>Cl<sub>2</sub> and washed with 1 M HCl, brine, saturated aq. NaHCO<sub>3</sub>, and brine. The organic layer was dried over anhydrous MgSO<sub>4</sub>, filtered, and concentrated *in vacuo*. The resulting residue was purified by flash silica gel column chromatography with hexane/EtOAc (100/0 to 95/5, v/v) to give **S6** (307 mg, 403  $\mu\text{mol}$ , 94%); *R<sub>f</sub>* = 0.58 (hexane/EtOAc = 5/1);  $^1\text{H}$  NMR (600 MHz, CDCl<sub>3</sub>)  $\delta$  7.83-7.43 (m, 7H, Ar), 5.37-5.31 (m, 4H, olefin), 5.28-5.25 (m, 1H, *sn*-2), 4.73-4.67 (m, 2H, -CH<sub>2</sub>Nap), 4.37-4.34 (m, 1H, *sn*-1<sub>a</sub>), 4.22-4.19 (m, 1H, *sn*-1<sub>b</sub>), 3.65-3.60 (m, 2H, *sn*-3), 2.32 (t, 2H, *J* = 7.2 Hz, *J* = 8.4 Hz, FA), 2.24 (t, 2H, *J* = 7.2 Hz, *J* = 7.8 Hz, FA), 2.02-1.98 (m, 8H, FA), 1.64-1.54 (m, 4H, FA), 1.36-1.26 (m, 40H, FA), 0.88 (t, 6H, *J* = 6.6 Hz, *J* = 7.2 Hz, FA);  $^{13}\text{C}$  NMR (150 MHz, CDCl<sub>3</sub>)  $\delta$  173.54, 173.25 (CO), 135.31, 133.35, 133.18 (Ar), 130.16, 129.87 (olefin), 128.41, 128.00, 127.85, 126.66, 126.33, 126.13, 125.74 (Ar), 73.56 (-CH<sub>2</sub>Nap), 70.16 (*sn*-2), 68.35 (*sn*-3), 62.77 (*sn*-1), 34.47, 34.23, 32.05, 29.92, 29.86, 29.68, 29.48, 29.35, 29.32, 29.28, 29.23, 27.37, 27.32, 25.09, 24.99, 22.83, 14.27 (FA) ppm.

### 3-4-2. Synthesis of 1,2-di-*O*-oleyl-3-*O*-di-*O*-*t*-butylphosphate-*sn*-glycerol: **S7**

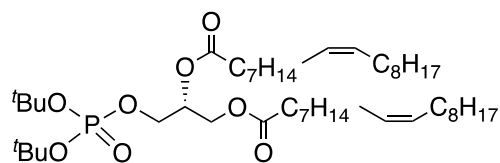

A solution of compound **S6** (100 mg, 131  $\mu\text{mol}$ ) in  $\text{CH}_2\text{Cl}_2/\text{H}_2\text{O}$  (9/1, 4 mL) was treated with DDQ (151 mg, 665  $\mu\text{mol}$ ) at 0  $^\circ\text{C}$  and stirred at 25  $^\circ\text{C}$  for 30 min. The mixture was diluted with  $\text{CHCl}_3$  and washed with water, saturated aq.  $\text{NaHCO}_3$ , and brine. The organic layer was dried over anhydrous  $\text{MgSO}_4$ , filtered, and concentrated *in vacuo*. The resulting residue was purified by flash silica gel column chromatography with hexane/EtOAc (100/0 to 83/17, v/v) to give 1,2-di-*O*-oleoyl-*sn*-glycerol intermediate. The crude diacyl glycerol intermediate was dissolved in  $\text{CH}_2\text{Cl}_2$  (1.1 mL), treated with di-*t*-butyl diisopropylphosphoramidite (106  $\mu\text{L}$ , 94 mg, 340  $\mu\text{mol}$ ) and 1*H*-tetrazole (32 mg, 460  $\mu\text{mol}$ ) at 0  $^\circ\text{C}$  and stirred at 25  $^\circ\text{C}$  for 25 min. Subsequently, the reaction mixture was cooled to 0  $^\circ\text{C}$ , treated with  $\text{H}_2\text{O}_2$  (35% aq., 200  $\mu\text{L}$ ), warmed to 25  $^\circ\text{C}$  and stirred for 15 min. The mixture was diluted with  $\text{CHCl}_3$  and washed with saturated aq.  $\text{NaHCO}_3$ , and brine. The organic layer was dried over anhydrous  $\text{MgSO}_4$ , filtered, and concentrated *in vacuo*. The resulting residue was purified by flash silica gel column chromatography with hexane/EtOAc (100/0 to 70/30, v/v) to give **S7** (75 mg, 92  $\mu\text{mol}$ , 70% in 3 steps);  $R_f$  = 0.49 (hexane/EtOAc = 2/1);  $^1\text{H}$  NMR (600 MHz,  $\text{CDCl}_3$ )  $\delta$  5.37-5.31 (m, 4H, olefin), 5.24-5.21 (m, 1H, *sn*-2), 4.37-4.34 (m, 1H, *sn*-1<sub>a</sub>), 4.18-4.15 (m, 1H, *sn*-1<sub>b</sub>), 4.10-4.04 (m, 2H, *sn*-3), 2.33-2.29 (m, 4H, FA), 2.02-1.99 (m, 8H, FA), 1.64-1.59 (m, 4H, FA), 1.49 (s, 9H,  $-\text{C}(\text{CH}_3)_3$ ), 1.48 (s, 9H,  $-\text{C}(\text{CH}_3)_3$ ), 1.35-1.24 (m, 40H, FA), 0.88 (t, 6H,  $J$  = 7.2 Hz,  $J$  = 6.6 Hz, FA);  $^{13}\text{C}$  NMR (150 MHz,  $\text{CDCl}_3$ )  $\delta$  173.42, 172.99 (CO), 130.16, 129.85 (olefin), 82.90 (d,  $^2J_{\text{CP}}$  = 7.2 Hz,  $-\text{C}(\text{CH}_3)_3$ ), 82.85 (d,  $^2J_{\text{CP}}$  = 8.6 Hz,  $-\text{C}(\text{CH}_3)_3$ ), 69.73 (d,  $^3J_{\text{CP}}$  = 8.7 Hz, *sn*-2), 64.49 (d,  $^2J$  = 5.9 Hz, *sn*-3), 62.15 (*sn*-1), 34.34, 34.19, 32.04 (FA), 29.98, 29.95 ( $-\text{C}(\text{CH}_3)_3$ ), 29.91, 29.86, 29.67, 29.47, 29.34, 29.27, 29.25, 29.22 (FA);  $^{31}\text{P}$  NMR (243 MHz,  $\text{CDCl}_3$ )  $\delta$  -9.39 ppm; MALDI-TOF MS calcd for  $\text{C}_{47}\text{H}_{89}\text{NaO}_8\text{P}$  [ $\text{M}+\text{Na}$ ] $^+$   $m/z$  835.62,  $\text{C}_{47}\text{H}_{89}\text{KO}_8\text{P}$  [ $\text{M}+\text{K}$ ] $^+$   $m/z$  851.59, found  $m/z$  836.85, 852.82.

### 3-4-3. Synthesis of PA (18:1/18:1): 1, 2-di-*O*-oleoyl-*sn*-glycerol-3-phosphate triethylammonium salt (**7**)

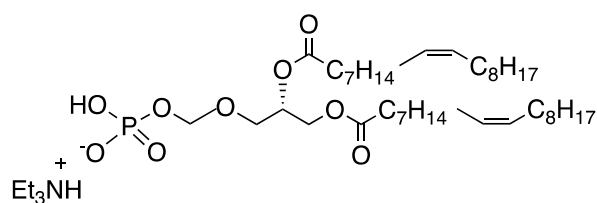

A solution of compound **S7** (33 mg, 40.0  $\mu\text{mol}$ ) in  $\text{CH}_2\text{Cl}_2$  (330  $\mu\text{L}$ ) was treated with trifluoroacetic acid (TFA, 77  $\mu\text{L}$ ) at 0  $^\circ\text{C}$  and stirred at 25  $^\circ\text{C}$  for 10 min. The organic solvent was removed by nitrogen gas. The residue was dissolved  $\text{CH}_2\text{Cl}_2$  (1 mL) and treated with methanolic ammonia (2 M, 1 mL). The organic solvent was removed by nitrogen gas and the residue was purified by silica gel column chromatography (Iatrobeads 6RS-8060 No.1104) with  $\text{CHCl}_3/\text{MeOH}/\text{H}_2\text{O}/\text{TEA}$  (100/0/0/1 to 89/11/0/0.2, 80/20/0/0.2, 67/33/5/0.2 v/v) to give **7** (30.2 mg, 37.6  $\mu\text{mol}$ , 94%);  $R_f$  = 0.31 ( $\text{CHCl}_3/\text{MeOH}$  = 5/1, 1% TEA);  $^1\text{H}$  NMR (600 MHz,  $\text{CDCl}_3$ ,  $\text{CD}_3\text{OD}$  3%)  $\delta$  5.37-5.31 (m, 4H, olefin), 5.25-5.22 (m, 1H, *sn*-2), 4.39-4.36 (m, 1H, *sn*-1<sub>a</sub>), 4.20-4.17 (m, 1H, *sn*-1<sub>b</sub>), 4.03-4.01 (m, 2H, *sn*-3), 3.09-3.05 (m,

6H, N-(CH<sub>2</sub>-CH<sub>3</sub>)<sub>3</sub>), 2.33-2.28 (m, 4H, FA), 2.03-1.99 (m, 8H, FA), 1.62-1.57 (m, 4H, FA), 1.32 (t, 9H, *J* = 7.2 Hz, *J* = 7.2 Hz, N-(CH<sub>2</sub>-CH<sub>3</sub>)<sub>3</sub>), 1.34-1.24 (m, 40H, FA), 0.88 (t, 6H, *J* = 6.6 Hz, *J* = 7.2 Hz, FA); <sup>13</sup>C NMR (150 MHz, CDCl<sub>3</sub>, CD<sub>3</sub>OD 3%) δ 173.74, 173.37 (CO), 130.08, 129.79 (olefin), 70.26 (d, <sup>3</sup>*J*<sub>CP</sub> = 8.6 Hz, *sn*-2), 63.72 (d, <sup>2</sup>*J*<sub>CP</sub> = 3.0 Hz, *sn*-3), 62.61 (*sn*-1), 45.72 (N-(CH<sub>2</sub>-CH<sub>3</sub>)<sub>3</sub>), 34.28, 34.13, 31.98, 29.84, 29.60, 29.39, 29.32, 29.31, 29.25, 29.20, 29.18, 27.30, 27.27, 24.93, 24.91, 22.76, 14.17 (FA), 8.45 (N-(CH<sub>2</sub>-CH<sub>3</sub>)<sub>3</sub>); <sup>31</sup>P NMR (243 MHz, CDCl<sub>3</sub>, CD<sub>3</sub>OD 3%) δ 0.43 ppm; MALDI-TOF MS calcd for C<sub>39</sub>H<sub>73</sub>NaO<sub>8</sub>P [M+Na]<sup>+</sup> *m/z* 723.49, C<sub>39</sub>H<sub>72</sub>Na<sub>2</sub>O<sub>8</sub>P [M+Na<sub>2</sub>]<sup>+</sup> *m/z* 745.48, C<sub>39</sub>H<sub>72</sub>KNaO<sub>8</sub>P [M+KNa]<sup>+</sup> *m/z* 761.45, found *m/z* 724.25, 746.28, 762.29.; HRMS calcd for [C<sub>39</sub>H<sub>72</sub>O<sub>8</sub>P]<sup>-</sup> requires *m/z* 699.4970; found 699.4966.

### 3-5. Synthesis of PA(18:0/16:0): 9

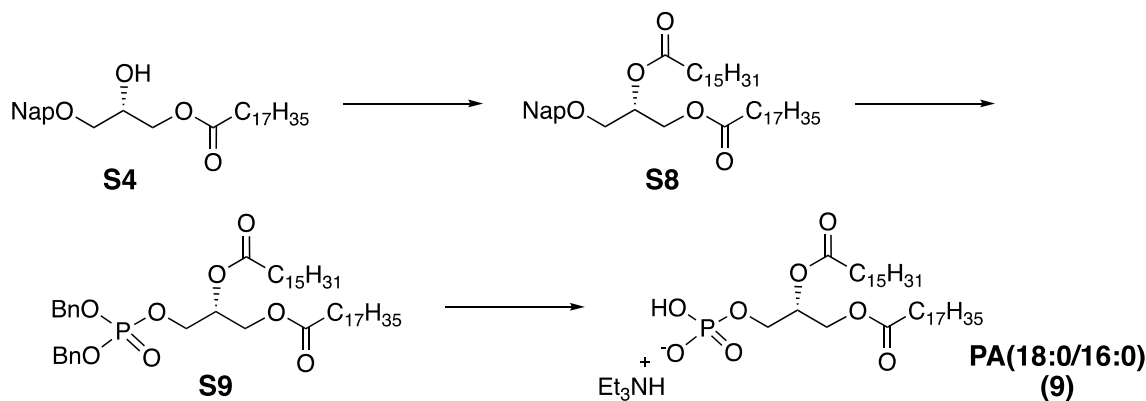

#### 3-5-1. Synthesis of 1-*O*-stearyl-2-*O*-palmitoyl-3-*O*-(2-naphtylmethyl)-*sn*-glycerol: S8

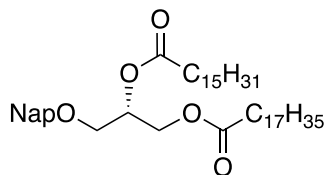

A solution of 1-*O*-stearyl-3-*O*-(2-naphtylmethyl)-*sn*-glycerol [Ref S1] (**S4**) (129 mg, 259 μmol) in CH<sub>2</sub>Cl<sub>2</sub> (5 mL) was stirred at 0 °C, and then treated with palmitic acid (141 mg, 550 μmol), DMAP (14 mg, 110 μmol) and EDC (110 mg, 574 μmol). The resulting mixture was stirred at 25 °C for 2 h. The reaction was quenched with MeOH (250 μL), diluted with CH<sub>2</sub>Cl<sub>2</sub> and washed with 1 N HCl, brine, aq. NaHCO<sub>3</sub> and brine. The organic layer was dried over anhydrous MgSO<sub>4</sub> and concentrated *in vacuo*. The residue was purified by silica gel column chromatography (hexane/EtOAc, 100/0 to 88/12) to give **S8** (185 mg, 251 μmol, 97%): R<sub>f</sub> 0.46 (toluene/EtOAc (5/1)); <sup>1</sup>H NMR (600 MHz, CDCl<sub>3</sub>) δ 7.84-7.43 (m, 7H, Ar), 5.28-5.25 (m, 1H, *sn*-2), 4.73-4.67 (m, 2H, -CH<sub>2</sub>Nap), 4.37-4.35 (m, 1H, *sn*-1<sub>a</sub>), 4.22-4.19 (m, 1H, *sn*-1<sub>b</sub>), 3.65-3.60 (m, 2H, *sn*-3), 2.32 (t, 2H, *J* = 7.2 Hz, *J* = 8.4 Hz, FA), 2.24 (t, 2H, *J* = 7.2 Hz, *J* = 7.8 Hz, FA), 1.63-1.54 (m, 4H, FA), 1.35-1.24 (m, 52H, FA), 0.88 (t, 6H, *J* = 6.6 Hz, *J* = 7.2 Hz, FA); <sup>13</sup>C NMR (150 MHz, CDCl<sub>3</sub>) δ 173.58, 173.28 (CO), 135.30, 133.35, 133.17, 128.40, 128.00, 127.84, 126.65, 126.32, 126.12, 125.73 (Ar), 73.55 (-CH<sub>2</sub>Nap), 70.14 (*sn*-2), 68.35 (*sn*-3), 62.76 (*sn*-1), 34.49, 34.25, 32.07, 29.85, 29.81, 29.78, 29.64, 29.52, 29.44, 29.42, 29.26, 25.10, 25.01, 22.84, 14.27 (FA) ppm; MALDI-TOF MS calcd for C<sub>48</sub>H<sub>80</sub>NaO<sub>5</sub> [M+Na]<sup>+</sup> *m/z* 759.59, C<sub>48</sub>H<sub>80</sub>KO<sub>5</sub> [M+K]<sup>+</sup> *m/z* 775.56, found *m/z* 760.63, 776.63.

#### 3-5-2. Synthesis of 1-*O*-stearoyl-2-*O*-palmitoyl-3-*O*-(di-*O*-benzylphosphate)-*sn*-glycerol S9

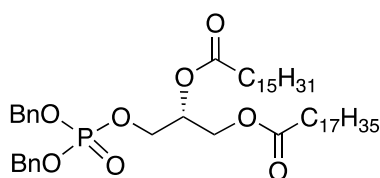

A solution of compound **S8** (100 mg, 131  $\mu\text{mol}$ ) in  $\text{CH}_2\text{Cl}_2/\text{H}_2\text{O}$  (9/1, 4 mL) was treated with DDQ (165 mg, 727  $\mu\text{mol}$ ) at 0 °C and stirred at 25 °C for 40 min. The resulting mixture was diluted with  $\text{CHCl}_3$  and washed with water, saturated aq.  $\text{NaHCO}_3$ , and brine. The organic layer was dried over anhydrous  $\text{MgSO}_4$ , filtered, and concentrated *in vacuo*. The resulting residue was purified by flash silica gel column chromatography with hexane/EtOAc (100/0 to 83/17, v/v) to give 1-*O*-stearoyl-2-*O*-palmitoyl-*sn*-glycerol intermediate. The diacyl glycerol intermediate was dissolved in  $\text{CH}_2\text{Cl}_2$  (1.4 mL), treated with dibenzyl diisopropylphosphoramidite (142  $\mu\text{L}$ , 147 mg, 425  $\mu\text{mol}$ ) and 1*H*-tetrazole (39 mg, 560  $\mu\text{mol}$ ) at 0 °C and stirred at 25 °C for 25 min. The reaction mixture was cooled to 0 °C, treated with  $\text{H}_2\text{O}_2$  (35% aq, 250  $\mu\text{L}$ ) and the resulting mixture was warmed to 25 °C and stirred for 15 min. Subsequently, the mixture was diluted with  $\text{CHCl}_3$  and washed with saturated aq.  $\text{NaHCO}_3$ , and brine. The resulting residue was recrystallized from EtOH (7 mL) to give **S9** (95 mg, 110  $\mu\text{mol}$ , 81% in 3 steps);  $R_f$  0.51 (hexane/EtOAc (5/1);  $^1\text{H}$  NMR (600 MHz,  $\text{CDCl}_3$ )  $\delta$  7.38-7.32 (m, 10H, Ar), 5.18-5.14 (m, 1H, *sn*-2), 5.07-5.00 (m, 4H,  $-\text{CH}_2\text{Ph}$ ), 4.26-4.24 (m, 1H, *sn*-1<sub>a</sub>), 4.13-4.06 (m, 3H, *sn*-3, *sn*-1<sub>b</sub>), 2.28-2.24 (m, 4H, FA), 1.60-1.55 (m, 4H, FA), 1.35-1.25 (m, 52H, FA), 0.88 (t, 6H,  $J = 6.6$  Hz,  $J = 7.2$  Hz, FA);  $^{13}\text{C}$  NMR (150 MHz,  $\text{CDCl}_3$ )  $\delta$  173.35, 172.95 (CO), 135.75, 135.72 (*ipso*), 128.76, 128.12 (Ar), 69.63 (d,  $^2J_{\text{CP}} = 5.7$  Hz,  $-\text{CH}_2\text{Ph}$ ), 69.43 (d,  $^3J_{\text{CP}} = 7.2$  Hz, *sn*-2), 65.52 (d,  $^2J_{\text{CP}} = 5.7$  Hz, *sn*-3), 61.73 (*sn*-1), 34.26, 34.14, 32.06, 29.84, 29.80, 29.78, 29.63, 29.51, 29.42, 29.26, 29.22, 24.97, 24.95, 22.83, 14.26 (FA);  $^{31}\text{P}$  NMR (243 MHz,  $\text{CDCl}_3$ )  $\delta$  -0.49 ppm; MALDI-TOF MS calcd for  $\text{C}_{51}\text{H}_{85}\text{NaO}_8\text{P}$   $[\text{M}+\text{Na}]^+$   $m/z$  879.59,  $\text{C}_{51}\text{H}_{85}\text{KO}_8\text{P}$   $[\text{M}+\text{K}]^+$   $m/z$  895.56, found  $m/z$  880.92, 896.93.

### 3-5-3. Synthesis of PA (18:0/16:0): 1-*O*-stearoyl-2-*O*-palmitoyl-*sn*-glycerol-3-phosphate triethylammonium salt (**9**)

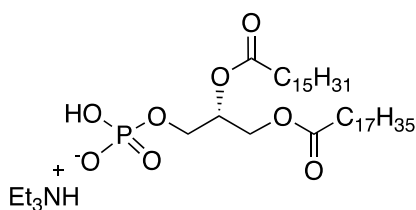

A suspension of 10% Pd/C catalyst (180 mg) in of EtOAc/EtOH (5/1, 28 mL) containing compound **S9** (74 mg, 86  $\mu\text{mol}$ ) was stirred at 35 °C for 23 h under a hydrogen atmosphere. Subsequently, the suspension was treated with TEA (13  $\mu\text{L}$ ) and stirred for 1 h. The resulting suspension was filtered over a bed of Celite, and the filtrate was concentrated *in vacuo*. The residue was purified by silica gel column chromatography (Iatrobeds 6RS-8060 No.1104) with  $\text{CHCl}_3/\text{MeOH}/\text{H}_2\text{O}/\text{TEA}$  (100/0/0/1 to 89/11/0/0.2, 80/20/0/0.2, 67/33/5/0.2 v/v) to give **9** (60 mg, 77  $\mu\text{mol}$ , 90%);  $R_f$  = 0.23 ( $\text{CHCl}_3/\text{MeOH}$  = 5/1, 1% TEA);  $^1\text{H}$  NMR (600 MHz,  $\text{CDCl}_3$ ,  $\text{CD}_3\text{OD}$  3%)  $\delta$  5.25-5.21 (m, 1H, *sn*-2), 4.39-4.36 (m, 1H, *sn*-1<sub>a</sub>), 4.20-4.17 (m, 1H, *sn*-1<sub>b</sub>), 4.03-4.01 (m, 2H, *sn*-3), 3.09-3.06 (m, 6H,  $\text{N}-(\text{CH}_2-\text{CH}_3)_3$ ), 2.32-2.28 (m, 4H, FA), 1.61-1.56 (m, 4H, FA), 1.31 (t, 9H,  $J = 7.2$  Hz,  $J = 7.2$  Hz,  $\text{N}-(\text{CH}_2-$

$\text{CH}_3)_3$ ), 1.35-1.25 (m, 52H, FA), 0.88 (t, 6H,  $J = 7.2$  Hz,  $J = 7.2$  Hz, FA);  $^{13}\text{C}$  NMR (150 MHz,  $\text{CDCl}_3$ ,  $\text{CD}_3\text{OD}$  3%)  $\delta$  173.79, 173.41 (CO), 70.30 (d,  $^3J_{\text{CP}} = 8.7$  Hz, *sn*-2), 63.63 (d,  $^2J_{\text{CP}} = 4.2$  Hz, *sn*-3), 62.65 (*sn*-1), 45.68 (N-( $\text{CH}_2\text{-CH}_3$ )<sub>3</sub>), 34.31, 34.17, 32.01, 29.79, 29.75, 29.61, 29.45, 29.42, 29.40, 29.24, 29.21, 24.96, 22.77, 14.18 (FA), 8.44 (N-( $\text{CH}_2\text{-CH}_3$ )<sub>3</sub>);  $^{31}\text{P}$  NMR (243 MHz,  $\text{CDCl}_3$ ,  $\text{CD}_3\text{OD}$  3%)  $\delta$  0.33 ppm; MALDI-TOF MS calcd for  $\text{C}_{37}\text{H}_{73}\text{NaO}_8\text{P}$   $[\text{M}+\text{Na}]^+$   $m/z$  699.49,  $\text{C}_{37}\text{H}_{72}\text{Na}_2\text{O}_8\text{P}$   $[\text{M}+\text{Na}_2]^+$   $m/z$  721.48,  $\text{C}_{37}\text{H}_{72}\text{KNaO}_8\text{P}$   $[\text{M}+\text{KNa}]^+$   $m/z$  737.45, found  $m/z$  700.20, 722.19, 738.18. ; HRMS calcd for  $[\text{C}_{37}\text{H}_{72}\text{O}_8\text{P}]^-$  requires  $m/z$  675.4970; found 675.4972.

### 3-6. Synthesis of PA (16:0/18:0): **11**

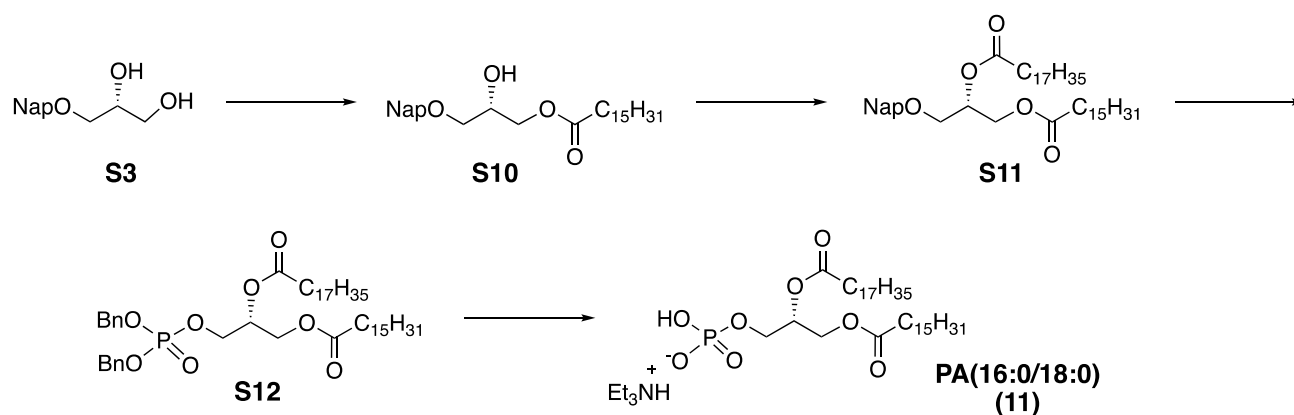

#### 3-6-1. Synthesis of 1-*O*-palmitoyl-3-*O*-(2-naphthylmethyl)-*sn*-glycerol: **S10**

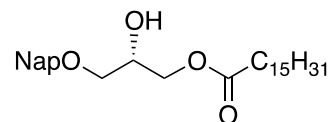

A solution of **S3** (101 mg, 435  $\mu\text{mol}$ ) in  $\text{CH}_2\text{Cl}_2$  (13 mL) was stirred at 0  $^\circ\text{C}$ , and treated with palmitic acid (137 mg, 534  $\mu\text{mol}$ ), DMAP (19 mg, 160  $\mu\text{mol}$ ) and EDC (114 mg, 595  $\mu\text{mol}$ ) at 0  $^\circ\text{C}$ . The reaction mixture was stirred at 25  $^\circ\text{C}$  for 1.5 h and subsequently quenched with MeOH (500  $\mu\text{L}$ ). The resulting mixture was diluted with  $\text{CH}_2\text{Cl}_2$  and washed with 1 M HCl, brine, aq.  $\text{NaHCO}_3$  and brine. The organic layer was dried over anhydrous  $\text{MgSO}_4$  and concentrated *in vacuo*. The residue was purified by silica gel column chromatography (toluene/EtOAc, 100/0 to 90/10, *v/v*) to give **S10** (152 mg, 323  $\mu\text{mol}$ , 74%);  $R_f$  = 0.45 (toluene/EtOAc, 5/1);  $^1\text{H}$  NMR (600 MHz,  $\text{CDCl}_3$ )  $\delta$  7.85-7.44 (m, 7H, Ar), 4.72 (s, 2H,  $-\text{CH}_2\text{Nap}$ ), 4.21-4.19 (m, 1H, *sn*-1<sub>a</sub>), 4.17-4.14 (m, 1H, *sn*-1<sub>b</sub>), 4.08-4.04 (m, 1H, *sn*-2), 3.61-3.58 (m, 1H, *sn*-3<sub>a</sub>), 3.55-3.52 (m, 1H, *sn*-3<sub>b</sub>), 2.55 (d, 1H,  $J = 4.8$  Hz, OH-*sn*-2), 2.29 (t, 2H,  $J = 7.8$  Hz,  $J = 7.8$  Hz, FA), 1.61-1.56 (m, 2H, FA), 1.35-1.25 (m, 24H, FA), 0.88 (t, 3H,  $J = 6.6$  Hz,  $J = 7.2$  Hz, FA) ;  $^{13}\text{C}$  NMR (150 MHz,  $\text{CDCl}_3$ )  $\delta$  174.12 (CO), 135.25, 133.35, 133.20, 128.49, 128.01, 127.86, 126.77, 126.37, 126.17, 125.79 (Ar), 73.77 ( $-\text{CH}_2\text{Nap}$ ), 70.98 (*sn*-3), 69.12 (*sn*-2), 65.47 (*sn*-1), 34.28, 32.07, 29.84, 29.80, 29.75, 29.60, 29.51, 29.39, 29.26, 25.04, 22.84, 14.27 (FA) ppm; MALDI-TOF MS calcd for  $\text{C}_{30}\text{H}_{46}\text{NaO}_4$   $[\text{M}+\text{Na}]^+$   $m/z$  493.33,  $\text{C}_{30}\text{H}_{46}\text{KO}_4$   $[\text{M}+\text{K}]^+$   $m/z$  509.30, found  $m/z$  493.93, 509.91.

#### 3-6-2. Synthesis of 1-*O*-palmitoyl-2-*O*-stearoyl-3-*O*-(2-naphthylmethyl)-*sn*-glycerol: **S11**

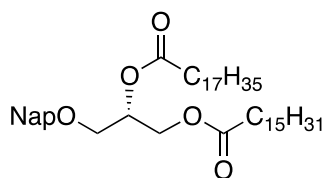

A solution of **S10** (76 mg, 161  $\mu$ mol) in  $\text{CH}_2\text{Cl}_2$  (3 mL) was stirred at 0  $^\circ\text{C}$ , and treated with stearic acid (109 mg, 383  $\mu$ mol), DMAP (7.5 mg, 61  $\mu$ mol) and EDC (64 mg, 330  $\mu$ mol). The reaction mixture was stirred at 25  $^\circ\text{C}$  for 2 h and subsequently quenched with MeOH (250  $\mu$ L). The resulting mixture was diluted with  $\text{CH}_2\text{Cl}_2$  and washed with 1 M HCl, brine, aq.  $\text{NaHCO}_3$  and brine. The organic layer was dried over anhydrous  $\text{MgSO}_4$  and concentrated *in vacuo*. The residue was purified by silica gel column chromatography (Hexane/EtOAc, 100/0 to 88/12) to give **S11** (109 mg, 148  $\mu$ mol, 92%):  $R_f$ =0.38 (hexane/EtOAc (5/1);  $^1\text{H}$  NMR (600 MHz,  $\text{CDCl}_3$ )  $\delta$  7.83-7.43 (m, 7H, Ar), 5.28-5.25 (m, 1H, *sn*-2), 4.73-4.67 (m, 2H,  $-\text{CH}_2\text{Nap}$ ), 4.37-4.35 (m, 1H, *sn*-1<sub>a</sub>), 4.22-4.19 (m, 1H, *sn*-1<sub>b</sub>), 3.65-3.60 (m, 2H, *sn*-3), 2.32 (t, 2H,  $J$  = 7.8 Hz,  $J$  = 7.8 Hz, FA), 2.24 (t, 2H,  $J$  = 7.8 Hz,  $J$  = 7.8 Hz, FA), 1.63-1.54 (m, 4H, FA), 1.35-1.24 (m, 52H, FA), 0.88 (t, 6H,  $J$  = 6.6 Hz,  $J$  = 7.2 Hz, FA) ;  $^{13}\text{C}$  NMR (150 MHz,  $\text{CDCl}_3$ )  $\delta$  173.57, 173.28 (CO), 135.30, 133.35, 133.18, 128.40, 128.00, 127.84, 126.65, 126.32, 126.12, 125.73 (Ar), 73.55 ( $-\text{CH}_2\text{Nap}$ ), 70.14 (*sn*-2), 68.35 (*sn*-3), 62.76 (*sn*-1), 34.49, 34.25, 32.07, 29.85, 29.81, 29.78, 29.64, 29.52, 29.45, 29.42, 29.26, 25.11, 25.01, 22.84, 14.27 (FA) ppm; MALDI-TOF MS calcd for  $\text{C}_{48}\text{H}_{80}\text{NaO}_5$   $[\text{M}+\text{Na}]^+$   $m/z$  759.59,  $\text{C}_{48}\text{H}_{80}\text{KO}_5$   $[\text{M}+\text{K}]^+$   $m/z$  775.56, found  $m/z$  760.62, 776.62.

### 3-6-3. Synthesis of 1-*O*-palmitoyl-2-*O*-stearoyl-3-*O*-(di-*O*-benzylphosphate)-*sn*-glycerol: **S12**

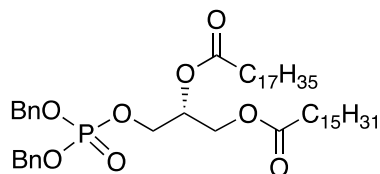

A solution of compound **S11** (90 mg, 122  $\mu$ mol) in  $\text{CH}_2\text{Cl}_2/\text{H}_2\text{O}$  (9/1, 3.4 mL) was treated with DDQ (167 mg, 736  $\mu$ mol) at 0  $^\circ\text{C}$  and the reaction mixture was stirred at 25  $^\circ\text{C}$  for 40 min. Subsequently, the mixture was diluted with  $\text{CHCl}_3$  and washed with water, saturated aq.  $\text{NaHCO}_3$ , and brine. The organic layer was dried over anhydrous  $\text{MgSO}_4$ , filtered, and concentrated *in vacuo*. The resulting residue was purified by flash silica gel column chromatography with hexane/EtOAc (100/0 to 83/17, v/v) to give the desired 1-*O*-palmitoyl-2-*O*-stearoyl-*sn*-glycerol intermediate. The diacyl glycerol intermediate was dissolved with  $\text{CH}_2\text{Cl}_2$  (1 mL), treated with dibenzyl diisopropylphosphoramidite (142  $\mu$ L, 147 mg, 425  $\mu$ mol) and 1*H*-tetrazole (28 mg, 402  $\mu$ mol) at 0  $^\circ\text{C}$  and stirred at 25  $^\circ\text{C}$  for 20 min. Subsequently, the reaction mixture was cooled to 0  $^\circ\text{C}$ , treated with  $\text{H}_2\text{O}_2$  (35% aq., 180  $\mu$ L) and the resulting mixture was warmed to 25  $^\circ\text{C}$  and stirred for 15 min. The mixture was diluted with  $\text{CHCl}_3$  and washed with saturated aq.  $\text{NaHCO}_3$ , and brine. The resulting residue was recrystallized from EtOH (5 mL) to give **S12** (79 mg, 92  $\mu$ mol, 75% in 3 steps);  $R_f$ =0.54 (hexane/EtOAc (2/1);  $^1\text{H}$  NMR (600 MHz,  $\text{CDCl}_3$ )  $\delta$  7.38-7.32 (m, 10H, Ar), 5.18-5.14 (m, 1H, *sn*-2), 5.07-5.00 (m, 4H,  $-\text{CH}_2\text{Ph}$ ), 4.26-4.24 (m, 1H, *sn*-1<sub>a</sub>), 4.13-4.06 (m, 3H, *sn*-3, *sn*-1<sub>b</sub>), 2.28-2.24 (m, 4H, FA), 1.59-1.55 (m, 4H, FA), 1.35-1.24 (m, 52H, FA), 0.88 (t, 6H,  $J$  = 6.6 Hz,  $J$  = 7.2 Hz, FA);  $^{13}\text{C}$  NMR (150 MHz,  $\text{CDCl}_3$ )  $\delta$  173.35, 172.96 (CO), 135.75, 135.72 (*ipso*), 128.76, 128.12 (Ar), 69.64 (d,



$^2J_{CP} = 5.7$  Hz,  $-\text{CH}_2\text{Ph}$ ), 69.43 (d,  $^3J_{CP} = 7.2$  Hz, *sn*-2), 65.52 (d,  $^2J_{CP} = 5.7$  Hz, *sn*-3), 61.73 (*sn*-1), 34.26, 34.14, 32.06, 29.84, 29.80, 29.63, 29.51, 29.42, 29.26, 29.22, 24.97, 24.95, 22.83, 14.26 (FA);  $^{31}\text{P}$  NMR (243 MHz,  $\text{CDCl}_3$ )  $\delta$  -0.51 ppm; MALDI-TOF MS calcd for  $\text{C}_{51}\text{H}_{85}\text{NaO}_8\text{P}$   $[\text{M}+\text{Na}]^+$   $m/z$  879.59,  $\text{C}_{51}\text{H}_{85}\text{KO}_8\text{P}$   $[\text{M}+\text{K}]^+$   $m/z$  895.56, found  $m/z$  880.78, 896.81.

### 3-6-4. Synthesis of PA (16:0/18:0): 1-*O*-palmitoyl-2-*O*-stearoyl-*sn*-glycerol-3-phosphate triethylammonium salt (11)

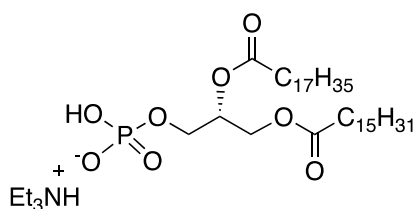

A suspension of 10% Pd/C catalyst (161 mg) in EtOAc/EtOH (5/1, 23 mL) containing compound **S12** (63 mg, 73.7  $\mu\text{mol}$ ) was stirred at 35 °C for 25 h under a hydrogen atmosphere. Subsequently the suspension was treated with TEA (13  $\mu\text{L}$ ) and stirred for 1 h. The resulting suspension was filtered over a bed of Celite, and the filtrate was concentrated *in vacuo*. The residue was purified by silica gel column chromatography (Iatrobeads 6RS-8060 No.1104) with  $\text{CHCl}_3/\text{MeOH}/\text{H}_2\text{O}/\text{TEA}$  (100/0/0/1 to 89/11/0/0.2, 80/20/0/0.2, 67/33/5/0.2 v/v) to give **11** (49 mg, 62.6  $\mu\text{mol}$ , 85%);  $R_f = 0.30$  ( $\text{CHCl}_3/\text{MeOH} = 5/1$ , 1% TEA);  $^1\text{H}$  NMR (600 MHz,  $\text{CDCl}_3$ ,  $\text{CD}_3\text{OD}$  3%)  $\delta$  5.25-5.22 (m, 1H, *sn*-2), 4.40-4.37 (m, 1H, *sn*-1<sub>a</sub>), 4.20-4.17 (m, 1H, *sn*-1<sub>b</sub>), 4.03-3.97 (m, 2H, *sn*-3), 3.09-3.05 (m, 6H, N-( $\text{CH}_2\text{-CH}_3$ )<sub>3</sub>), 2.31-2.28 (m, 4H, FA), 1.62-1.56 (m, 4H, FA), 1.31 (t, 9H,  $J = 7.2$  Hz,  $J = 7.2$  Hz, N-( $\text{CH}_2\text{-CH}_3$ )<sub>3</sub>), 1.35-1.25 (m, 52H, FA), 0.88 (t, 6H,  $J = 7.2$  Hz,  $J = 7.2$  Hz, FA);  $^{13}\text{C}$  NMR (150 MHz,  $\text{CDCl}_3$ ,  $\text{CD}_3\text{OD}$  3%)  $\delta$  173.79, 173.40 (CO), 70.48 (d,  $^3J_{CP} = 8.7$  Hz, *sn*-2), 63.36 (d,  $^2J_{CP} = 4.2$  Hz, *sn*-3), 62.80 (*sn*-1), 45.60 (N-( $\text{CH}_2\text{-CH}_3$ )<sub>3</sub>), 34.34, 34.18, 32.00, 29.79, 29.75, 29.60, 29.45, 29.40, 29.24, 24.97, 24.94, 22.77, 14.18 (FA), 8.43 (N-( $\text{CH}_2\text{-CH}_3$ )<sub>3</sub>);  $^{31}\text{P}$  NMR (243 MHz,  $\text{CDCl}_3$ ,  $\text{CD}_3\text{OD}$  3%)  $\delta$  0.38 ppm; MALDI-TOF MS calcd for  $\text{C}_{37}\text{H}_{73}\text{NaO}_8\text{P}$   $[\text{M}+\text{Na}]^+$   $m/z$  699.49,  $\text{C}_{37}\text{H}_{72}\text{Na}_2\text{O}_8\text{P}$   $[\text{M}+\text{Na}_2]^+$   $m/z$  721.48,  $\text{C}_{37}\text{H}_{72}\text{KNaO}_8\text{P}$   $[\text{M}+\text{KNa}]^+$   $m/z$  737.45, found  $m/z$  700.22, 722.25, 738.18. ; HRMS calcd for  $[\text{C}_{37}\text{H}_{72}\text{O}_8\text{P}]^-$  requires  $m/z$  675.4970; found 675.4985.

### 3-7. Synthesis of PA (16:0/16:0): 13

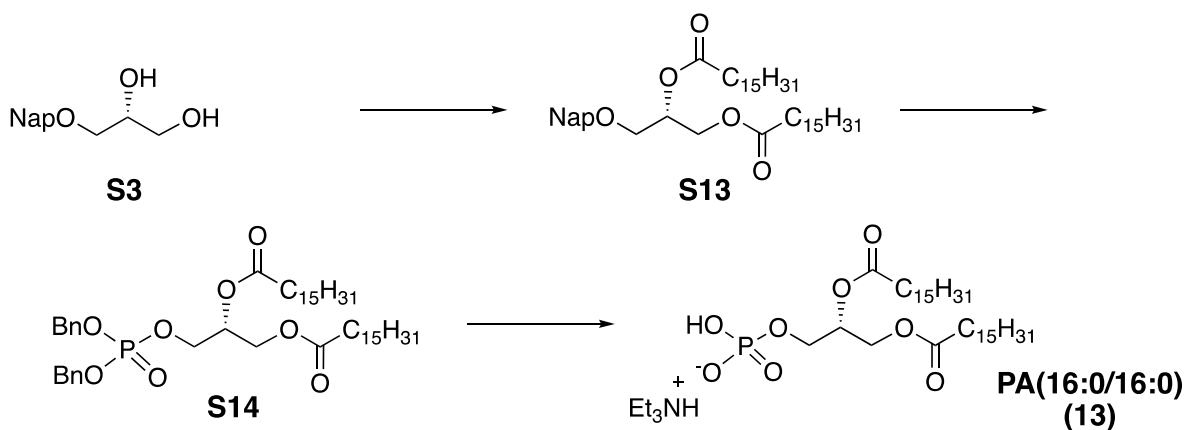

### 3-7-1. Synthesis of 1, 2-di-*O*-palmitoyl -3-*O*-(2-naphtylmethyl)-*sn*-glycerol: **S13**

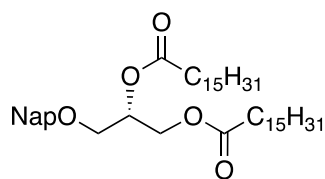

**S3** (104 mg, 448  $\mu$ mol), palmitic acid (258 mg, 1.01 mmol) and DMAP (37 mg, 300  $\mu$ mol) were dissolved in dry  $\text{CH}_2\text{Cl}_2$  (13 mL) under argon and treated with EDC (202 mg, 1.05 mmol) at 0  $^\circ\text{C}$ . The reaction mixture was warmed to 40  $^\circ\text{C}$  and stirred at 40  $^\circ\text{C}$  for 15 h. The reaction was quenched with  $\text{CH}_3\text{OH}$  at 0  $^\circ\text{C}$ , diluted with  $\text{CH}_2\text{Cl}_2$  and washed with 1 M HCl, brine, saturated aq.  $\text{NaHCO}_3$ , and brine. The organic layer was dried over anhydrous  $\text{MgSO}_4$ , filtered, and concentrated *in vacuo*. The resulting residue was purified by flash silica gel column chromatography with hexane/EtOAc (100/0 to 88/12, v/v) to give **S13** (221 mg, 312  $\mu$ mol, 70%);  $R_f$  = 0.58 (hexane/EtOAc = 5/1);  $^1\text{H}$  NMR (600 MHz,  $\text{CDCl}_3$ )  $\delta$  7.83-7.43 (m, 7H, Ar), 5.28-5.25 (m, 1H, *sn*-2), 4.73-4.67 (m, 2H,  $-\text{CH}_2\text{Nap}$ ), 4.37-4.35 (m, 1H, *sn*-1<sub>a</sub>), 4.22-4.19 (m, 1H, *sn*-1<sub>b</sub>), 3.65-3.61 (m, 2H, *sn*-3), 2.32 (t, 2H,  $J$  = 7.2 Hz,  $J$  = 7.8 Hz, FA), 2.24 (t, 2H,  $J$  = 7.8 Hz,  $J$  = 7.8 Hz, FA), 1.63-1.54 (m, 4H, FA), 1.34-1.24 (m, 48H, FA), 0.88 (t, 6H,  $J$  = 6.6 Hz,  $J$  = 7.2 Hz, FA);  $^{13}\text{C}$  NMR (150 MHz,  $\text{CDCl}_3$ )  $\delta$  173.58, 173.29 (CO), 135.31, 133.35, 133.18, 128.41, 128.01, 127.85, 126.66, 126.33, 126.13, 125.74 (Ar), 73.56 ( $-\text{CH}_2\text{Nap}$ ), 70.15 (*sn*-2), 68.36 (*sn*-3), 62.77 (*sn*-1), 34.50, 34.26, 32.08, 29.85, 29.82, 29.79, 29.64, 29.52, 29.45, 29.43, 29.27, 25.11, 25.02, 22.84, 14.27 (FA) ppm; MALDI-TOF MS calcd for  $\text{C}_{46}\text{H}_{76}\text{NaO}_5$   $[\text{M}+\text{Na}]^+$   $m/z$  731.56,  $\text{C}_{46}\text{H}_{76}\text{KO}_5$   $[\text{M}+\text{K}]^+$   $m/z$  747.53, found  $m/z$  732.53, 748.53.

### 3-7-2. Synthesis of 1, 2-di-*O*-palmitoyl-3-*O*-(di-*O*-benzylphosphate)-*sn*-glycerol: **S14**

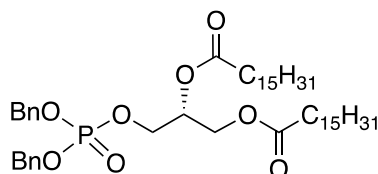

A solution of compound **S13** (111 mg, 157  $\mu$ mol) in  $\text{CH}_2\text{Cl}_2/\text{H}_2\text{O}$  (9/1, 4 mL) was treated with DDQ (177 mg, 780  $\mu$ mol) at 0  $^\circ\text{C}$  and the reaction mixture was stirred at 25  $^\circ\text{C}$  for 45 min. Subsequently, the mixture was diluted with  $\text{CHCl}_3$  and washed with water, saturated aq.  $\text{NaHCO}_3$ , and brine. The organic layer was dried over anhydrous  $\text{MgSO}_4$ , filtered, and concentrated *in vacuo*. The resulting residue was purified by flash silica gel column chromatography with hexane/EtOAc (100/0 to 83/17, v/v) to give the desired 1,2-di-*O*-palmitoyl-*sn*-glycerol intermediate. The diacyl glycerol intermediate was dissolved in  $\text{CH}_2\text{Cl}_2$  (1.5 mL), treated with dibenzyl diisopropylphosphoramidite (148  $\mu$ L, 153 mg, 442  $\mu$ mol) and 1*H*-tetrazole (36 mg, 514  $\mu$ mol) at 0  $^\circ\text{C}$  and stirred at 25  $^\circ\text{C}$  for 30 min. The reaction mixture was cooled to 0 $^\circ\text{C}$ , treated with  $\text{H}_2\text{O}_2$  (35% aq., 260  $\mu$ L) and the reaction mixture was warmed to 25  $^\circ\text{C}$  and stirred for 20 min. Subsequently, the mixture was diluted with  $\text{CHCl}_3$  and washed with saturated aq.  $\text{NaHCO}_3$ , and brine. The organic layer was dried over anhydrous  $\text{MgSO}_4$ , filtered, and concentrated *in vacuo*. The resulting residue was recrystallized from EtOH (16 mL) to give **S14** (112 mg, 135  $\mu$ mol, 86% in 3 steps);  $R_f$  = 0.48 (hexane/EtOAc = 2/1);  $^1\text{H}$  NMR (600 MHz,  $\text{CDCl}_3$ )  $\delta$  7.38-7.32 (m, 10H, Ar), 5.18-

5.14 (m, 1H, *sn*-2), 5.07-5.00 (m, 4H, -CH<sub>2</sub>Ph), 4.26-4.24 (m, 1H, *sn*-1<sub>a</sub>), 4.13-4.06 (m, 3H, *sn*-3, *sn*-1<sub>b</sub>), 2.28-2.24 (m, 4H, FA), 1.60-1.55 (m, 4H, FA), 1.35-1.24 (m, 48H, FA), 0.88 (t, 6H, *J* = 6.6 Hz, *J* = 7.2 Hz, FA); <sup>13</sup>C NMR (150 MHz, CDCl<sub>3</sub>) δ 173.35, 172.95 (CO), 135.77, 135.71 (*ipso*), 128.76, 128.11 (Ar), 69.63 (d, <sup>2</sup>*J*<sub>CP</sub> = 5.7 Hz, -CH<sub>2</sub>Ph), 69.43 (d, <sup>3</sup>*J*<sub>CP</sub> = 7.2 Hz, *sn*-2), 65.51 (d, <sup>2</sup>*J*<sub>CP</sub> = 4.4 Hz, *sn*-3), 61.73 (*sn*-1), 34.26, 34.14, 32.06, 29.84, 29.80, 29.78, 29.63, 29.51, 29.42, 29.26, 29.22, 24.97, 24.95, 22.83, 14.26 (FA); <sup>31</sup>P NMR (243 MHz, CDCl<sub>3</sub>) δ -0.49 ppm; MALDI-TOF MS calcd for C<sub>49</sub>H<sub>81</sub>NaO<sub>8</sub>P [M+Na]<sup>+</sup> *m/z* 851.56, C<sub>49</sub>H<sub>81</sub>KO<sub>8</sub>P [M+K]<sup>+</sup> *m/z* 867.53, found *m/z* 852.69, 868.68.

### 3-7-3. Synthesis of PA (16:0/16:0):1, 2-di-*O*-palmitoyl-*sn*-glycerol-3-phosphate triethylammonium salt (**13**)

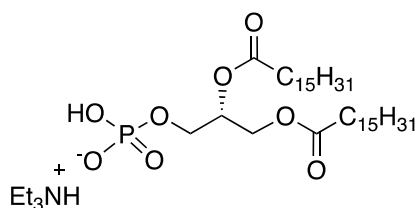

A suspension of 10% Pd/C catalyst (211 mg) in EtOAc/EtOH (5/1, 29 mL) containing compound **S14** (81 mg, 91.8 μmol) was stirred at 35 °C for 24 h under a hydrogen atmosphere. Subsequently, the suspension was treated with TEA (21 μL) and stirred for 1 h. The suspension was filtered over a bed of Celite, and the filtrate was concentrated *in vacuo*. The residue was purified by silica gel column chromatography (Iatrobeds 6RS-8060 No.1104) with CHCl<sub>3</sub>/MeOH/H<sub>2</sub>O/TEA (100/0/0/1 to 89/11/0/0.2, 80/20/0/0.2, 67/33/5/0.2 v/v) to give **13** (59 mg, 73.4 μmol, 80%); *R<sub>f</sub>* = 0.23 (CHCl<sub>3</sub>/MeOH = 5/1, 1% TEA); <sup>1</sup>H NMR (600 MHz, CDCl<sub>3</sub>, CD<sub>3</sub>OD 3%) δ 5.25-5.22 (m, 1H, *sn*-2), 4.39-4.36 (m, 1H, *sn*-1<sub>a</sub>), 4.20-4.17 (m, 1H, *sn*-1<sub>b</sub>), 4.02-4.00 (m, 2H, *sn*-3), 3.09-3.05 (m, 6H, N-(CH<sub>2</sub>-CH<sub>3</sub>)<sub>3</sub>), 2.32-2.28 (m, 4H, FA), 1.62-1.56 (m, 4H, FA), 1.32 (t, 9H, *J* = 7.2 Hz, *J* = 7.2 Hz, N-(CH<sub>2</sub>-CH<sub>3</sub>)<sub>3</sub>), 1.30-1.25 (m, 48H, FA), 0.88 (t, 6H, *J* = 7.2 Hz, *J* = 7.2 Hz, FA); <sup>13</sup>C NMR (150 MHz, CDCl<sub>3</sub>, CD<sub>3</sub>OD 3%) δ 173.78, 173.39 (CO), 70.40 (d, <sup>3</sup>*J*<sub>CP</sub> = 8.7 Hz, *sn*-2), 63.52 (d, <sup>2</sup>*J*<sub>CP</sub> = 4.4 Hz, *sn*-3), 62.74 (*sn*-1), 45.66 (N-(CH<sub>2</sub>-CH<sub>3</sub>)<sub>3</sub>), 34.34, 34.19, 32.02, 29.80, 29.76, 29.62, 29.46, 29.41, 29.25, 24.98, 24.95, 22.78, 14.19 (FA), 8.46 (N-(CH<sub>2</sub>-CH<sub>3</sub>)<sub>3</sub>); <sup>31</sup>P NMR (243 MHz, CDCl<sub>3</sub>, CD<sub>3</sub>OD 3%) δ 0.43 ppm.; MALDI-TOF MS calcd for C<sub>35</sub>H<sub>69</sub>NaO<sub>8</sub>P [M+Na]<sup>+</sup> *m/z* 671.46, C<sub>35</sub>H<sub>68</sub>Na<sub>2</sub>O<sub>8</sub>P [M+Na<sub>2</sub>]<sup>+</sup> *m/z* 693.44, C<sub>35</sub>H<sub>69</sub>KO<sub>8</sub>P [M+K]<sup>+</sup> *m/z* 687.44, C<sub>35</sub>H<sub>68</sub>KNaO<sub>8</sub>P [M+KNa]<sup>+</sup> *m/z* 709.42, found *m/z* 672.42, 694.48, 688.46, 710.52.; HRMS calcd for [C<sub>35</sub>H<sub>68</sub>O<sub>8</sub>P]<sup>-</sup> requires *m/z* 647.4657; found 647.4665.

### 3-8. Synthesis of 2,2-dimethyl-1,3-dioxolan-4-ylmethyl phosphatidyl glucoside: **2**

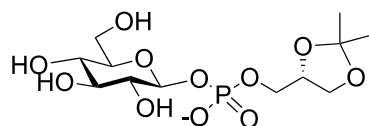

2,2-Dimethyl-1,3-dioxolan-4-ylmethyl phosphatidic acid: **1** (15 mg, 48 μmol), D-glucose (26 mg, 144 μmol) and TEA (240 μL, 1.72 mmol) were dissolved in CH<sub>3</sub>CN/H<sub>2</sub>O (1/4, 796 μL) and treated with DMC (72.8 mg, 431 μmol) at 0 °C. The reaction mixture was stirred at 4 °C for 1 h. The mixture was passed over a solid phase extraction column

(Strata™-X 33  $\mu$ m Polymeric Reversed Phase) with H<sub>2</sub>O/MeOH (100/0 to 97/3). All fractions containing **2** were pooled and concentrated *in vacuo*. The residue was purified by silica gel column chromatography (Iatrobeads 6RS-8060 No.1104) with CHCl<sub>3</sub>/MeOH/H<sub>2</sub>O/TEA (100/0/0/1 to 89/11/0/0.2, 80/20/0/0.2, 67/33/5/0.2 v/v) to give **2** (10 mg, 44%);  $R_f$  = 0.55 (CHCl<sub>3</sub>/MeOH = 1/1, 1% TEA); <sup>1</sup>H NMR (600 MHz, CDCl<sub>3</sub>, CD<sub>3</sub>OD 3%):  $\delta$  4.94 (t, 1H, H-1), 4.36-4.32 (m, 1H, *sn*-2), 4.06-4.04 (m, 1H, *sn*-1<sub>a</sub>), 3.99-3.96 (m, 1H, *sn*-3<sub>a</sub>), 3.93-3.87 (m, 3H, *sn*-3<sub>b</sub>, *sn*-1<sub>b</sub>, H-6), 3.71-3.68 (m, 1H, H-6'), 3.53 (t, 1H, H-3), 3.45-3.37 (m, 2H, H-5, H-4), 3.35 (t, 1H, H-2), 3.11-3.08 (m, 6H, N-(CH<sub>2</sub>-CH<sub>3</sub>)<sub>3</sub>), 1.41 (s, 3H, -CH<sub>3</sub>Isop), 1.34 (s, 3H, -CH<sub>3</sub>Isop), 1.31 (t, 9H, N-(CH<sub>2</sub>-CH<sub>3</sub>)<sub>3</sub>); <sup>13</sup>C NMR (150 MHz, CDCl<sub>3</sub>, CD<sub>3</sub>OD 3%):  $\delta$  109.58 (Isopropylidene), 98.41 (d, <sup>2</sup> $J_{CP}$  = 5.8 Hz, C-1), 77.09 (C-5), 76.40 (C-3), 74.82 (d, <sup>3</sup> $J_{CP}$  = 8.6 Hz, *sn*-2), 74.38 (d, <sup>3</sup> $J_{CP}$  = 7.1 Hz, C-2), 70.30 (C-4), 66.50 (*sn*-1), 66.08 (d, <sup>2</sup> $J_{CP}$  = 4.4 Hz, *sn*-3), 62.14 (C-6), 45.76 (N-(CH<sub>2</sub>-CH<sub>3</sub>)<sub>3</sub>), 26.83 (-CH<sub>3</sub>Isop), 25.35 (-CH<sub>3</sub>Isop), 8.59 (N-(CH<sub>2</sub>-CH<sub>3</sub>)<sub>3</sub>); <sup>31</sup>P NMR (243 MHz, CDCl<sub>3</sub>, CD<sub>3</sub>OD 3%)  $\delta$  -2.08 ppm: ESI MS calcd for [C<sub>12</sub>H<sub>22</sub>O<sub>11</sub>P]<sup>-</sup> requires  $m/z$  373.09; found 373.13.; HRMS calcd for [C<sub>12</sub>H<sub>22</sub>O<sub>11</sub>P]<sup>-</sup> requires  $m/z$  373.0905; found 373.0898.

### 3-9. Synthesis of phosphatidyl glucoside (PtdGlc) (18:0/20:0): **4**

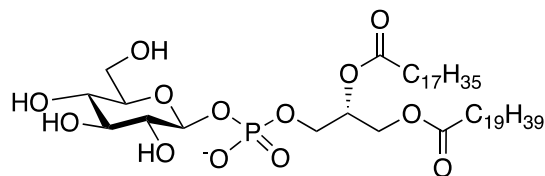

PA(18:0/20:0) (**3**) (Ref S1)(5.0 mg, 6  $\mu$ mol), D-glucose (3.3 mg, 18  $\mu$ mol) and TEA (30  $\mu$ L, 215 mmol) were suspended in propionitrile/H<sub>2</sub>O (1/5, 90  $\mu$ L) and treated with DMC (9.1 mg, 55  $\mu$ mol) at 0 °C. The reaction mixture was stirred at 4 °C for 1 h. Subsequently, the mixture was subjected to silica gel column chromatography (Iatrobeads 6RS-8060 No.1104) and eluted with CHCl<sub>3</sub>/MeOH/TEA (100/0/1 to 89/11/0.2, 80/20/0.2, v/v). All fractions containing **4** were collected and concentrated *in vacuo*. The residue was purified by gel permeation column chromatography (Sephadex LH20) with CHCl<sub>3</sub>/MeOH/TEA (50/50/1, v/v) to give **4** (2.1 mg, 35%); <sup>1</sup>H NMR (600 MHz, CDCl<sub>3</sub>/CD<sub>3</sub>OD = 2/1)  $\delta$  5.28-5.25 (m, 1H, *sn*-2), 4.84 (t, 1H,  $J$  = 7.8 Hz,  $J$  = 7.8 Hz, H-1), 4.44-4.43 (m, 1H, *sn*-1<sub>a</sub>), 4.20-4.17 (m, 1H, *sn*-1<sub>b</sub>), 4.10-4.03 (m, 2H, *sn*-3), 3.90-3.88 (m, 1H, H-6), 3.67-3.64 (m, 1H, H-6'), 3.47-3.37 (m, 2H, H-3, H-5), 3.32-3.28 (m, 2H, H-4, H-2), 3.16-3.13 (m, 6H, N-(CH<sub>2</sub>-CH<sub>3</sub>)<sub>3</sub>), 2.34-2.30 (m, 4H, FA), 1.64-1.58 (m, 4H, FA), 1.34 (t, 9H,  $J$  = 7.8 Hz,  $J$  = 7.2 Hz, N-(CH<sub>2</sub>-CH<sub>3</sub>)<sub>3</sub>), 1.33-1.27 (m, 60H, FA), 0.89 (t, 6H,  $J$  = 6.6 Hz,  $J$  = 7.2 Hz, FA); <sup>13</sup>C NMR (150 MHz, CDCl<sub>3</sub>/CD<sub>3</sub>OD = 2/1)  $\delta$  173.83, 173.43 (CO), 97.88 (d, <sup>2</sup> $J_{CP}$  = 5.7 Hz, C-1), 76.84 (C-5), 75.98 (C-3), 73.95 (d, <sup>3</sup> $J_{CP}$  = 7.2 Hz, C-2), 70.27 (d, <sup>3</sup> $J_{CP}$  = 8.7 Hz, *sn*-2), 69.91 (C-4), 63.55 (d, <sup>2</sup> $J_{CP}$  = 4.4 Hz, *sn*-3), 62.55 (*sn*-1), 61.60 (C-6), 46.00 (N-(CH<sub>2</sub>-CH<sub>3</sub>)<sub>3</sub>), 33.99, 33.83, 31.65, 29.42, 29.38, 29.26, 29.09, 29.06, 28.88, 24.64, 24.60, 22.38, 13.63 (FA), 8.19 (N-(CH<sub>2</sub>-CH<sub>3</sub>)<sub>3</sub>); <sup>31</sup>P NMR (243 MHz, CDCl<sub>3</sub>/CD<sub>3</sub>OD = 2/1)  $\delta$  -2.73 ppm; ESI MS calcd for [C<sub>47</sub>H<sub>90</sub>O<sub>13</sub>P]<sup>-</sup> requires  $m/z$  893.61; found 893.59. HR-MS calcd for [C<sub>47</sub>H<sub>90</sub>O<sub>13</sub>P]<sup>-</sup> requires  $m/z$  893.6124; found 893.6143.; HRMS calcd for [C<sub>47</sub>H<sub>90</sub>O<sub>13</sub>P]<sup>-</sup> requires  $m/z$  893.6124; found 893.6139. These data are consistent with previously reported [Ref BMCL].

### 3-10. Synthesis of PtdGlc (**4**) by stepwise addition of DMC and D-glucose.

PA(18:0/20:0) (**3**) (5.0 mg, 6  $\mu$ mol), D-glucose (3.3 mg, 18  $\mu$ mol) and TEA (30  $\mu$ L, 215 mmol) were suspended in propionitrile/H<sub>2</sub>O (1/5, 90  $\mu$ L) and treated with DMC (9.1 mg, 55  $\mu$ mol) at 0 °C. The reaction mixture was stirred at 4 °C for 15 min. Subsequently, 4 times a solution of glucose (3.3 mg, 18  $\mu$ mol), DMC (9.1 mg, 55  $\mu$ mol), and TEA (15  $\mu$ L, 108 mmol) in H<sub>2</sub>O/CH<sub>3</sub>CH<sub>2</sub>CN (5:1, total volume 45  $\mu$ L) was added to the reaction mixture in 15 min intervals. The final reaction mixture was applied to silica gel column chromatography (Iatrobeds 6RS-8060 No.1104) and eluted with CHCl<sub>3</sub>/MeOH/TEA (100/0/1 to 89/11/0.2, 80/20/0.2, v/v). All fractions containing **4** were collected and concentrated *in vacuo*. The residue was purified by gel permeation column chromatography (Sephadex LH20) with CHCl<sub>3</sub>/MeOH/TEA (50/50/1, v/v) to give **4** (4.8 mg, 81%).

### 3-11. Synthesis of PtdGlc (18:0/18:0): **6**

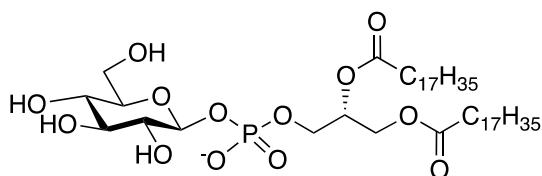

PA(18:0/18:0) **5** (1.0 mg, 1.2  $\mu$ mol), D-glucose (0.65 mg, 3.6  $\mu$ mol) and TEA (6  $\mu$ L, 43 mmol) were suspended in propionitrile/H<sub>2</sub>O (1/5, 18  $\mu$ L), treated with DMC (1.8 mg, 11  $\mu$ mol) at 0 °C and stirred at 4 °C for 1 h. The reaction mixture was applied to silica gel column chromatography (Iatrobeds 6RS-8060 No.1104) and eluted with CHCl<sub>3</sub>/MeOH/TEA (100/0/1 to 89/11/0.2, 80/20/0.2, v/v). All fractions containing **6** were collected and concentrated *in vacuo*. The residue was purified by gel permeation column chromatography (Sephadex LH20) with CHCl<sub>3</sub>/MeOH/TEA (50/50/1, v/v) to give **6** (0.38 mg, 32%); <sup>1</sup>H NMR (600 MHz, CDCl<sub>3</sub> / CD<sub>3</sub>OD = 2 / 1):  $\delta$  5.28-5.25 (m, 1H, *sn*-2), 4.85 (t, 1H, *J* = 7.8 Hz, *J* = 7.8 Hz, H-1), 4.45-4.44 (m, 1H, *sn*-1<sub>a</sub>), 4.20-4.17 (m, 1H, *sn*-1<sub>b</sub>), 4.10-4.03 (m, 2H, *sn*-3), 3.88-3.86 (m, 1H, H-6), 3.69-3.66 (m, 1H, H-6'), 3.46-3.42 (m, 1H, H-3), 3.38-3.37 (m, 1H, H-5), 3.33-3.28 (m, 2H, H-4, H-2), 3.16-3.12 (m, 6H, N-(CH<sub>2</sub>-CH<sub>3</sub>)<sub>3</sub>), 2.34-2.30 (m, 4H, FA), 1.64-1.58 (m, 4H, FA), 1.33 (t, 9H, *J* = 7.2 Hz, *J* = 7.8 Hz, N-(CH<sub>2</sub>-CH<sub>3</sub>)<sub>3</sub>), 1.31-1.27 (m, 56H, FA), 0.89 (t, 6H, *J* = 6.6 Hz, *J* = 6.6 Hz, FA); <sup>13</sup>C NMR (150 MHz, CDCl<sub>3</sub> / CD<sub>3</sub>OD = 2 / 1):  $\delta$  173.84, 173.43 (CO), 97.90 (d, <sup>2</sup>*J*<sub>CP</sub> = 7.2 Hz, C-1), 76.85 (C-5), 76.01 (C-3), 73.97 (d, <sup>3</sup>*J*<sub>CP</sub> = 8.6 Hz, C-2), 70.28 (d, <sup>3</sup>*J*<sub>CP</sub> = 7.1 Hz, *sn*-2), 69.92 (C-4), 63.55 (d, <sup>2</sup>*J*<sub>CP</sub> = 4.4 Hz, *sn*-3), 62.56 (*sn*-1), 61.62 (C-6), 46.06 (N-(CH<sub>2</sub>-CH<sub>3</sub>)<sub>3</sub>), 34.00, 33.83, 31.66, 29.43, 29.39, 29.28, 29.09, 28.88, 24.64, 24.60, 22.39, 13.63 (FA), 8.20 (N-(CH<sub>2</sub>-CH<sub>3</sub>)<sub>3</sub>); <sup>31</sup>P NMR (243 MHz, CDCl<sub>3</sub> / CD<sub>3</sub>OD = 2 / 1)  $\delta$  -2.76 ppm; ESI MS calcd for [C<sub>45</sub>H<sub>86</sub>O<sub>13</sub>P]<sup>-</sup> requires *m/z* 865.58; found 865.65.; HRMS calcd for [C<sub>45</sub>H<sub>86</sub>O<sub>13</sub>P]<sup>-</sup> requires *m/z* 865.5811; found 865.5809.

### 3-12. Synthesis of PtdGlc (18:1/18:1): **8**

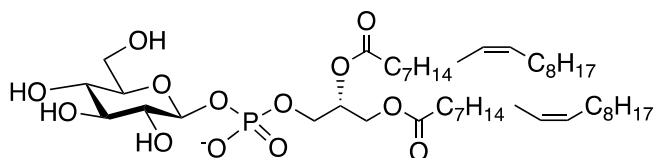

PA(18:1/18:1) **7** (5.0 mg, 6  $\mu$ mol), D-glucose (3.3 mg, 18  $\mu$ mol) and TEA (30  $\mu$ L, 215 mmol) were suspended in

propionitrile/H<sub>2</sub>O (1/5, 90  $\mu$ L), treated with DMC (9.1 mg, 55  $\mu$ mol) at 0 °C and stirred at 4 °C for 1 h. The mixture was applied to silica gel column chromatography (Iatrobeads 6RS-8060 No.1104) and eluted with CHCl<sub>3</sub>/MeOH/TEA (100/0/1 to 89/11/0.2, 80/20/0.2, v/v). All fractions containing **8** were collected and concentrated *in vacuo*. The residue was purified by gel permeation column chromatography (Sephadex LH20) with CHCl<sub>3</sub>/MeOH/TEA (50/50/1, v/v) to give **8** (1.8 mg, 29%); <sup>1</sup>H NMR (600 MHz, CDCl<sub>3</sub> / CD<sub>3</sub>OD = 2 / 1):  $\delta$  5.38-5.32 (m, 4H, olefin), 5.28-5.25 (m, 1H, *sn*-2), 4.85 (t, 1H, *J* = 7.8 Hz, *J* = 7.8 Hz, H-1), 4.44-4.43 (m, 1H, *sn*-1<sub>a</sub>), 4.20-4.17 (m, 1H, *sn*-1<sub>b</sub>), 4.10-4.03 (m, 2H, *sn*-3), 3.89-3.87 (m, 1H, H-6), 3.69-3.66 (m, 1H, H-6'), 3.48-3.37 (m, 2H, H-3, H-5), 3.33-3.28 (m, 2H, H-4, H-2), 3.17-3.13 (m, 6H, N-(CH<sub>2</sub>-CH<sub>3</sub>)<sub>3</sub>), 2.34-2.30 (m, 4H, FA), 2.04-2.00 (m, 8H, FA), 1.64-1.58 (m, 4H, FA), 1.35 (t, 9H, *J* = 7.8 Hz, *J* = 7.2 Hz, N-(CH<sub>2</sub>-CH<sub>3</sub>)<sub>3</sub>), 1.34-1.28 (m, 44H, FA), 0.89 (t, 6H, *J* = 6.6 Hz, *J* = 7.2 Hz, FA); <sup>13</sup>C NMR (150 MHz, CDCl<sub>3</sub> / CD<sub>3</sub>OD = 2 / 1):  $\delta$  173.77, 173.37 (CO), 129.70, 129.42 (olefin), 97.96 (d, <sup>2</sup>*J*<sub>CP</sub> = 5.7 Hz, C-1), 76.87 (C-5), 76.06 (C-3), 74.00 (d, <sup>3</sup>*J*<sub>CP</sub> = 7.1 Hz, C-2), 70.29 (, <sup>3</sup>*J*<sub>CP</sub> = 8.6 Hz, *sn*-2), 69.89 (C-4), 63.56 (d, <sup>2</sup>*J*<sub>CP</sub> = 4.2 Hz, *sn*-3), 62.57 (*sn*-1), 61.63 (C-6), 46.03 (N-(CH<sub>2</sub>-CH<sub>3</sub>)<sub>3</sub>), 33.96, 33.80, 31.62, 29.47, 29.23, 29.03, 28.98, 28.94, 28.88, 28.87, 28.84, 28.15, 26.90, 25.40, 24.61, 24.58, 22.37, 13.62 (FA), 8.18 (N-(CH<sub>2</sub>-CH<sub>3</sub>)<sub>3</sub>); <sup>31</sup>P NMR (243 MHz, CDCl<sub>3</sub> / CD<sub>3</sub>OD = 2 / 1)  $\delta$  -2.92 ppm: ESI MS calcd for [C<sub>45</sub>H<sub>82</sub>O<sub>13</sub>P]<sup>-</sup> requires *m/z* 861.55; found 861.52.; HRMS calcd for [C<sub>45</sub>H<sub>82</sub>O<sub>13</sub>P]<sup>-</sup> requires *m/z* 861.5498; found 861.5509.

### 3-13. Synthesis of PtdGlc (18:0/16:0): **10**

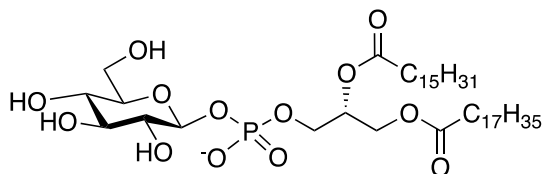

PA(18:0/16:0) **9** (1.0 mg, 1.2  $\mu$ mol), D-glucose (0.65 mg, 3.6  $\mu$ mol) and TEA (6  $\mu$ L, 43 mmol) were suspended in propionitrile/H<sub>2</sub>O (1/5, 18  $\mu$ L), treated with DMC (1.8 mg, 11  $\mu$ mol) at 0 °C and stirred at 4 °C for 1 h. The mixture was applied to silica gel column chromatography (Iatrobeads 6RS-8060 No.1104) and eluted with CHCl<sub>3</sub>/MeOH/TEA (100/0/1 to 89/11/0.2, 80/20/0.2, v/v). All fractions containing **10** were collected and concentrated *in vacuo*. The residue was purified by gel permeation column chromatography (Sephadex LH20) with CHCl<sub>3</sub>/MeOH/TEA (50/50/1, v/v) to give **10** (0.34 mg, 28%); <sup>1</sup>H NMR (600 MHz, CDCl<sub>3</sub> / CD<sub>3</sub>OD = 2 / 1):  $\delta$  5.28-5.25 (m, 1H, *sn*-2), 4.84 (t, 1H, *J* = 7.2 Hz, *J* = 7.8 Hz, H-1), 4.46-4.43 (m, 1H, *sn*-1<sub>a</sub>), 4.20-4.17 (m, 1H, *sn*-1<sub>b</sub>), 4.10-4.03 (m, 2H, *sn*-3), 3.90-3.87 (m, 1H, H-6), 3.68-3.65 (m, 1H, H-6'), 3.47-3.41 (m, 1H, H-3), 3.39-3.37 (m, 1H, H-5), 3.32-3.28 (m, 2H, H-4, H-2), 3.16-3.13 (m, 6H, N-(CH<sub>2</sub>-CH<sub>3</sub>)<sub>3</sub>), 2.34-2.30 (m, 4H, FA), 1.64-1.58 (m, 4H, FA), 1.34 (t, 9H, *J* = 7.2 Hz, *J* = 7.8 Hz, N-(CH<sub>2</sub>-CH<sub>3</sub>)<sub>3</sub>), 1.32-1.27 (m, 52H, FA), 0.89 (m, 6H, *J* = 6.6 Hz, *J* = 7.2 Hz, FA); <sup>13</sup>C NMR (150 MHz, CDCl<sub>3</sub> / CD<sub>3</sub>OD = 2 / 1):  $\delta$  173.82, 173.42 (CO), 97.89 (d, <sup>2</sup>*J*<sub>CP</sub> = 5.7 Hz, C-1), 76.85 (C-5), 76.00 (C-3), 73.97 (d, <sup>3</sup>*J*<sub>CP</sub> = 7.2 Hz, C-2), 70.27 (d, <sup>3</sup>*J*<sub>CP</sub> = 8.7 Hz, *sn*-2), 69.90 (C-4), 63.52 (d, <sup>2</sup>*J*<sub>CP</sub> = 4.4 Hz, *sn*-3), 62.55 (*sn*-1), 61.60 (C-6), 45.99 (N-(CH<sub>2</sub>-CH<sub>3</sub>)<sub>3</sub>), 33.97, 33.82, 31.64, 29.41, 29.25, 29.07, 28.87, 24.62, 24.60, 22.37, 13.61 (FA), 8.18 (N-(CH<sub>2</sub>-CH<sub>3</sub>)<sub>3</sub>); <sup>31</sup>P NMR (243 MHz, CDCl<sub>3</sub> / CD<sub>3</sub>OD = 2 / 1)  $\delta$  -2.76 ppm: ESI MS calcd for [C<sub>43</sub>H<sub>82</sub>O<sub>13</sub>P]<sup>-</sup> requires *m/z* 837.55; found 837.57.; HRMS calcd for [C<sub>43</sub>H<sub>82</sub>O<sub>13</sub>P]<sup>-</sup> requires *m/z* 837.5498; found 837.5498.

### 3-14. Synthesis of PtdGlc (16:0/18:0): **12**

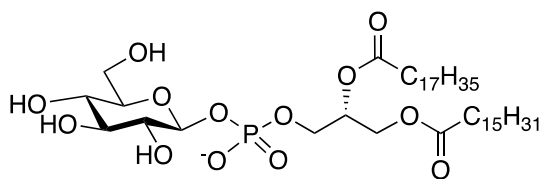

PA(16:0/18:) **11** (5.0 mg, 6  $\mu$ mol), D-glucose (3.3 mg, 18  $\mu$ mol) and TEA (30  $\mu$ L, 215 mmol) were suspended in propionitrile/H<sub>2</sub>O (1/5, 90  $\mu$ L), treated with DMC (9.1 mg, 55  $\mu$ mol) at 0 °C and stirred at 4 °C for 1 h. The mixture was applied to silica gel column chromatography (Iatrobeads 6RS-8060 No.1104) and eluted with CHCl<sub>3</sub>/MeOH/TEA (100/0/1 to 89/11/0.2, 80/20/0.2, v/v). All fractions containing **12** were collected and concentrated *in vacuo*. The residue was purified by gel permeation column chromatography (Sephadex LH20) with CHCl<sub>3</sub>/MeOH/TEA (50/50/1, v/v) to give **12** (1.6 mg, 27%); <sup>1</sup>H NMR (600 MHz, CDCl<sub>3</sub> / CD<sub>3</sub>OD = 2 / 1):  $\delta$  5.28-5.25 (m, 1H, *sn*-2), 4.84 (t, 1H, *J* = 7.8 Hz, *J* = 7.8 Hz, H-1), 4.45-4.43 (m, 1H, *sn*-1<sub>a</sub>), 4.20-4.17 (m, 1H, *sn*-1<sub>b</sub>), 4.10-4.03 (m, 2H, *sn*-3), 3.89-3.86 (m, 1H, H-6), 3.69-3.66 (m, 1H, H-6'), 3.48-3.41 (m, 1H, H-3), 3.39-3.37 (m, 1H, H-5), 3.33-3.28 (m, 2H, H-4, H-2), 3.18-3.15 (m, 6H, N-(CH<sub>2</sub>-CH<sub>3</sub>)<sub>3</sub>), 2.34-2.30 (m, 4H, FA), 1.64-1.58 (m, 4H, FA), 1.36 (t, 9H, *J* = 7.2 Hz, *J* = 7.8 Hz, N-(CH<sub>2</sub>-CH<sub>3</sub>)<sub>3</sub>), 1.33-1.27 (m, 52H, FA), 0.89 (t, *J* = 6.6 Hz, *J* = 7.2 Hz, FA); <sup>13</sup>C NMR (150 MHz, CDCl<sub>3</sub> / CD<sub>3</sub>OD = 2 / 1):  $\delta$  173.81, 173.41 (CO), 97.93 (d, <sup>2</sup>*J*<sub>CP</sub> = 5.9 Hz, C-1), 76.86 (C-5), 76.04 (C-3), 73.99 (d, <sup>3</sup>*J*<sub>CP</sub> = 8.6 Hz, C-2), 70.27 (d, <sup>3</sup>*J*<sub>CP</sub> = 8.7 Hz, *sn*-2), 69.88 (C-4), 63.54 (d, <sup>2</sup>*J*<sub>CP</sub> = 5.7 Hz, *sn*-3), 62.55 (*sn*-1), 61.62 (C-6), 46.12 (N-(CH<sub>2</sub>-CH<sub>3</sub>)<sub>3</sub>), 33.98, 33.82, 31.64, 29.41, 29.36, 29.26, 29.24, 29.07, 29.04, 28.87, 28.85, 24.63, 24.59, 22.37, 13.61 (FA), 8.19 (N-(CH<sub>2</sub>-CH<sub>3</sub>)<sub>3</sub>); <sup>31</sup>P NMR (243 MHz, CDCl<sub>3</sub> / CD<sub>3</sub>OD = 2 / 1)  $\delta$  -2.90 ppm; ESI MS calcd for [C<sub>43</sub>H<sub>82</sub>O<sub>13</sub>P]<sup>-</sup> requires *m/z* 837.55; found 837.59.; HRMS calcd for [C<sub>43</sub>H<sub>82</sub>O<sub>13</sub>P]<sup>-</sup> requires *m/z* 837.5498; found 837.5472.

### 3-15. Synthesis of PtdGlc (16:0/16:0): **14**

**3-15-1.** Using 1,2-di-*O*-palmitoyl-*sn*-glycerol-3-phosphate triethylammonium salt.

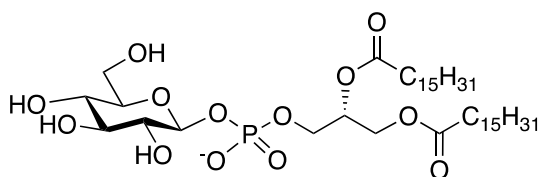

PA(16:0/16:0) **13** (10 mg, 12  $\mu$ mol), D-glucose (6.5 mg, 36  $\mu$ mol) and TEA (60  $\mu$ L, 430 mmol) were suspended in propionitrile/H<sub>2</sub>O (1/5, 180  $\mu$ L), treated with DMC (1.8 mg, 11  $\mu$ mol) at 0 °C and stirred at 4 °C for 1 h. The mixture was applied to silica gel column chromatography (Iatrobeads 6RS-8060 No.1104) and eluted with CHCl<sub>3</sub>/MeOH/TEA (100/0/1 to 89/11/0.2, 80/20/0.2, v/v). All fractions containing **14** were collected and concentrated *in vacuo*. The residue was purified by gel permeation column chromatography (Sephadex LH20) with CHCl<sub>3</sub>/MeOH/TEA (50/50/1, v/v) to give **14** (3.9 mg, 31%); <sup>1</sup>H NMR (600 MHz, CDCl<sub>3</sub> / CD<sub>3</sub>OD = 2 / 1):  $\delta$  5.28-5.25 (m, 1H, *sn*-2), 4.85 (t, 1H, *J* = 7.2 Hz, *J* = 7.8 Hz, H-1), 4.48-4.43 (m, 1H, *sn*-1<sub>a</sub>), 4.20-4.17 (m, 1H, *sn*-1<sub>b</sub>), 4.10-4.02 (m, 2H, *sn*-3), 3.89-3.86 (m, 1H, H-6), 3.69-3.66 (m, 1H, H-6'), 3.47-3.42 (m, 1H, H-3), 3.39-3.37 (m, 1H, H-5), 3.33-3.28 (m, 2H, H-4, H-2), 3.14-3.10 (m, 6H, N-(CH<sub>2</sub>-CH<sub>3</sub>)<sub>3</sub>), 2.34-2.30 (m, 4H, FA), 1.64-1.58 (m, 4H, FA),

1.33 (t, 9H,  $J = \text{Hz}$ ,  $J = \text{Hz}$ , N-(CH<sub>2</sub>-CH<sub>3</sub>)<sub>3</sub>), 1.32-1.27 (m, 48H, FA), 0.89 (t, 6H,  $J = 7.2 \text{ Hz}$ ,  $J = 6.6 \text{ Hz}$ , FA); <sup>13</sup>C NMR (150 MHz, CDCl<sub>3</sub>/CD<sub>3</sub>OD = 2 / 1):  $\delta$  173.82, 173.41 (CO), 97.94 (d,  $^2J_{\text{CP}} = 5.7 \text{ Hz}$ , C-1), 76.88 (C-5), 76.06 (C-3), 74.00 (d,  $^3J_{\text{CP}} = 6.1 \text{ Hz}$ , C-2), 70.28 (d,  $^3J_{\text{CP}} = 8.6 \text{ Hz}$ , *sn*-2), 69.89 (C-4), 63.55 (d,  $^2J_{\text{CP}} = 5.7 \text{ Hz}$ , *sn*-3), 62.55 (*sn*-1), 61.64 (C-6), 45.89 (N-(CH<sub>2</sub>-CH<sub>3</sub>)<sub>3</sub>), 33.99, 33.83, 31.66, 29.43, 29.26, 29.09, 29.06, 28.88, 24.64, 24.60, 22.39, 13.66, 13.62 (FA), 8.20 (N-(CH<sub>2</sub>-CH<sub>3</sub>)<sub>3</sub>); <sup>31</sup>P NMR (243 MHz, CDCl<sub>3</sub>/CD<sub>3</sub>OD = 2 / 1)  $\delta$  -2.90 ppm: ESI MS calcd for [C<sub>41</sub>H<sub>78</sub>O<sub>13</sub>P]<sup>-</sup> requires  $m/z$  809.52; found 809.59.; HRMS calcd for [C<sub>41</sub>H<sub>78</sub>O<sub>13</sub>P]<sup>-</sup> requires  $m/z$  809.5185; found 809.5203.

### 3-15-2. Using 1,2-di-*O*-palmitoyl-*sn*-glycerol-3-phosphate sodium salt.

1,2-di-*O*-palmitoyl-*sn*-glycerol-3-phosphate sodium salt (**13**, 1 mg, 1.2  $\mu\text{mol}$ ), D-glucose (0.65 mg, 3.6  $\mu\text{mol}$ ) and TEA (6  $\mu\text{L}$ , 43 mmol) were suspended in propionitrile/H<sub>2</sub>O (1/5, 18  $\mu\text{L}$ ), treated with DMC (1.8 mg, 11  $\mu\text{mol}$ ) at 0 °C and stirred at 4 °C for 1 h. The mixture was applied to silica gel column chromatography (Iatrobeds 6RS-8060 No.1104) and eluted with CHCl<sub>3</sub>/MeOH/TEA (100/0/1 to 89/11/0.2, 80/20/0.2, *v/v*). All fractions containing **14** were collected and concentrated *in vacuo*. The residue was purified by gel permeation column chromatography (Sephadex LH20) with CHCl<sub>3</sub>/MeOH/TEA (50/50/1, *v/v*) to give **14** (0.28 mg, 20%).

### 3-16. Synthesis of <sup>13</sup>C-labeled phosphatidyl glucoside (U-<sup>13</sup>C<sub>6</sub>): **15**

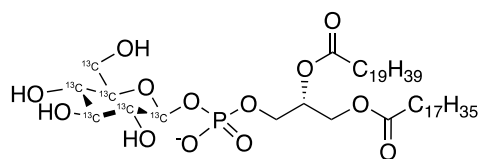

A mixture of PA(18:0/20:0) **3** (5.0 mg, 6  $\mu\text{mol}$ ), <sup>13</sup>C<sub>6</sub>-D-glucose (3.3 mg, 18  $\mu\text{mol}$ ) and TEA (30  $\mu\text{L}$ , 215 mmol) in 90  $\mu\text{L}$  of propionitrile/H<sub>2</sub>O (1/5) was treated with DMC (9.1 mg, 55  $\mu\text{mol}$ ) at 0 °C. The reaction mixture was stirred at 4 °C for 1 h. The mixture was applied to silica gel column chromatography (Iatrobeds 6RS-8060 No.1104) and eluted with CHCl<sub>3</sub>/MeOH/TEA (100/0/1 to 89/11/0.2, 80/20/0.2, *v/v*). The eluent was evaporated *in vacuo*. The residue was purified by gel permeation column chromatography (Sephadex LH20) with CHCl<sub>3</sub>/MeOH/TEA (50/50/1, *v/v*) to give **15** (1.5 mg, 25%); <sup>1</sup>H NMR (600 MHz, CDCl<sub>3</sub>/CD<sub>3</sub>OD = 2 / 1):  $\delta$  5.28-5.24 (m, 1H, *sn*-2), 4.82 (dt, 1H,  $^1J_{\text{CH}} = 162.6 \text{ Hz}$ ,  $^3J_{\text{HP}} = 7.8 \text{ Hz}$ ,  $J = 7.8 \text{ Hz}$ , H-1), 4.42-4.40 (m, 1H, *sn*-1<sub>a</sub>), 4.21-4.18 (m, 1H, *sn*-1<sub>b</sub>), 4.09-4.02 (m, 3H, *sn*-3, H-6), 3.80-3.74 (m, 1H, H-6'), 3.56-3.39 (m, 2H, H-3, H-5), 3.32-3.25 (m, 2H, H-4, H-2), 3.17-3.14 (m, 6H, N-(CH<sub>2</sub>-CH<sub>3</sub>)<sub>3</sub>), 2.34-2.30 (m, 4H, FA), 1.64-1.58 (m, 4H, FA), 1.35 (t, 9H,  $J = 7.2 \text{ Hz}$ ,  $J = 7.2 \text{ Hz}$ , N-(CH<sub>2</sub>-CH<sub>3</sub>)<sub>3</sub>), 1.33-1.27 (m, 60H, FA), 0.89 (m, 6H,  $J = 7.2 \text{ Hz}$ ,  $J = 7.2 \text{ Hz}$ , FA); <sup>13</sup>C NMR (150 MHz, CDCl<sub>3</sub>/CD<sub>3</sub>OD = 2 / 1):  $\delta$  97.77 (dd,  $J = 46.7 \text{ Hz}$ ,  $^2J_{\text{CP}} = 4.4 \text{ Hz}$ , 2.9 Hz, C-1), 76.79 (t,  $J = 43.1 \text{ Hz}$ ,  $J = 41.7 \text{ Hz}$ , C-5), 75.89 (t,  $J = 38.7 \text{ Hz}$ ,  $J = 38.9 \text{ Hz}$ , C-3), 73.87 (m,  $J = 42.5 \text{ Hz}$ ,  $J = 42.3 \text{ Hz}$ ,  $^3J_{\text{CP}} = 7.2 \text{ Hz}$ , 7.2 Hz, 5.7 Hz, 7.2 Hz, C-2), 69.92 (t,  $J = 38.7 \text{ Hz}$ ,  $J = 40.4 \text{ Hz}$ , C-4), 61.53 (d,  $J = 43.2 \text{ Hz}$ , C-6), 29.41 (FA); <sup>31</sup>P NMR (243 MHz, CDCl<sub>3</sub>/CD<sub>3</sub>OD = 2 / 1)  $\delta$  -2.33 ppm: ESI MS calcd for [<sup>13</sup>C<sub>6</sub>C<sub>41</sub>H<sub>90</sub>O<sub>13</sub>P]<sup>-</sup> requires  $m/z$  899.61; found 899.65, HRMS calcd for [<sup>13</sup>C<sub>6</sub>C<sub>41</sub>H<sub>90</sub>O<sub>13</sub>P]<sup>-</sup> requires  $m/z$  899.6325; found 899.6333.



#### **4. $^1\text{H}$ , $^{13}\text{C}$ , and $^{31}\text{P}$ NMR spectra of synthetic compounds:**

PA derivatives (**1, 5, 7, 9, 11, and 13**)

PtdGlc derivatives (**2, 4, 6, 8, 10, 12, 14, and 15**)

$^1\text{H}$ -NMR data of (*R*)-(2,2-dimethyl-1,3-dioxolan-4-yl)methyl hydrogen phosphate triethylammonium salt (**1**), 600 MHz,  $\text{CDCl}_3$ ,  $\text{CD}_3\text{OD}$  3%

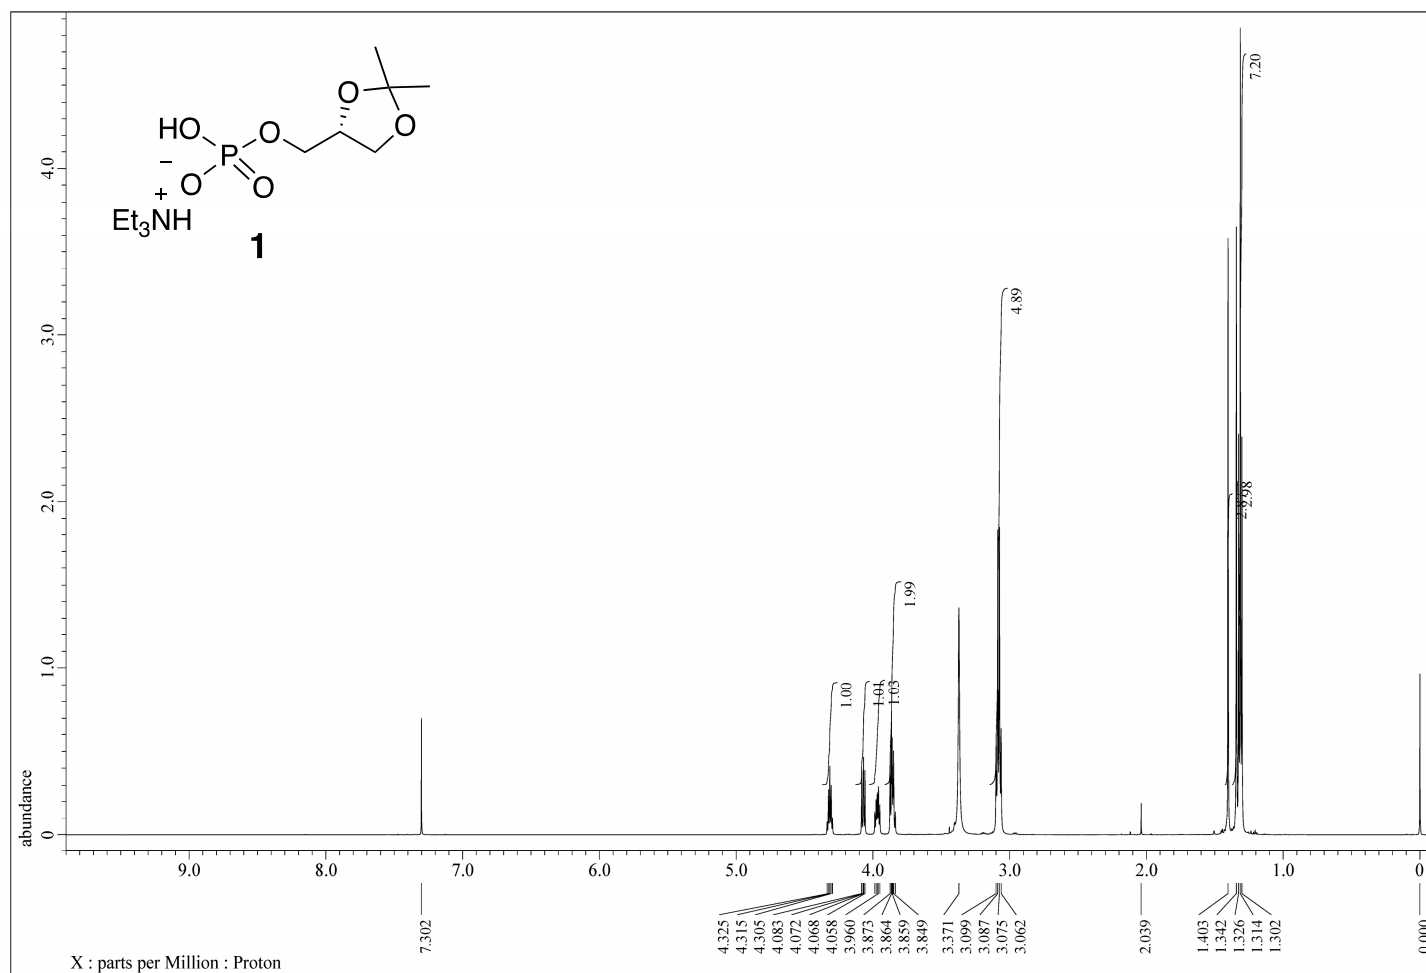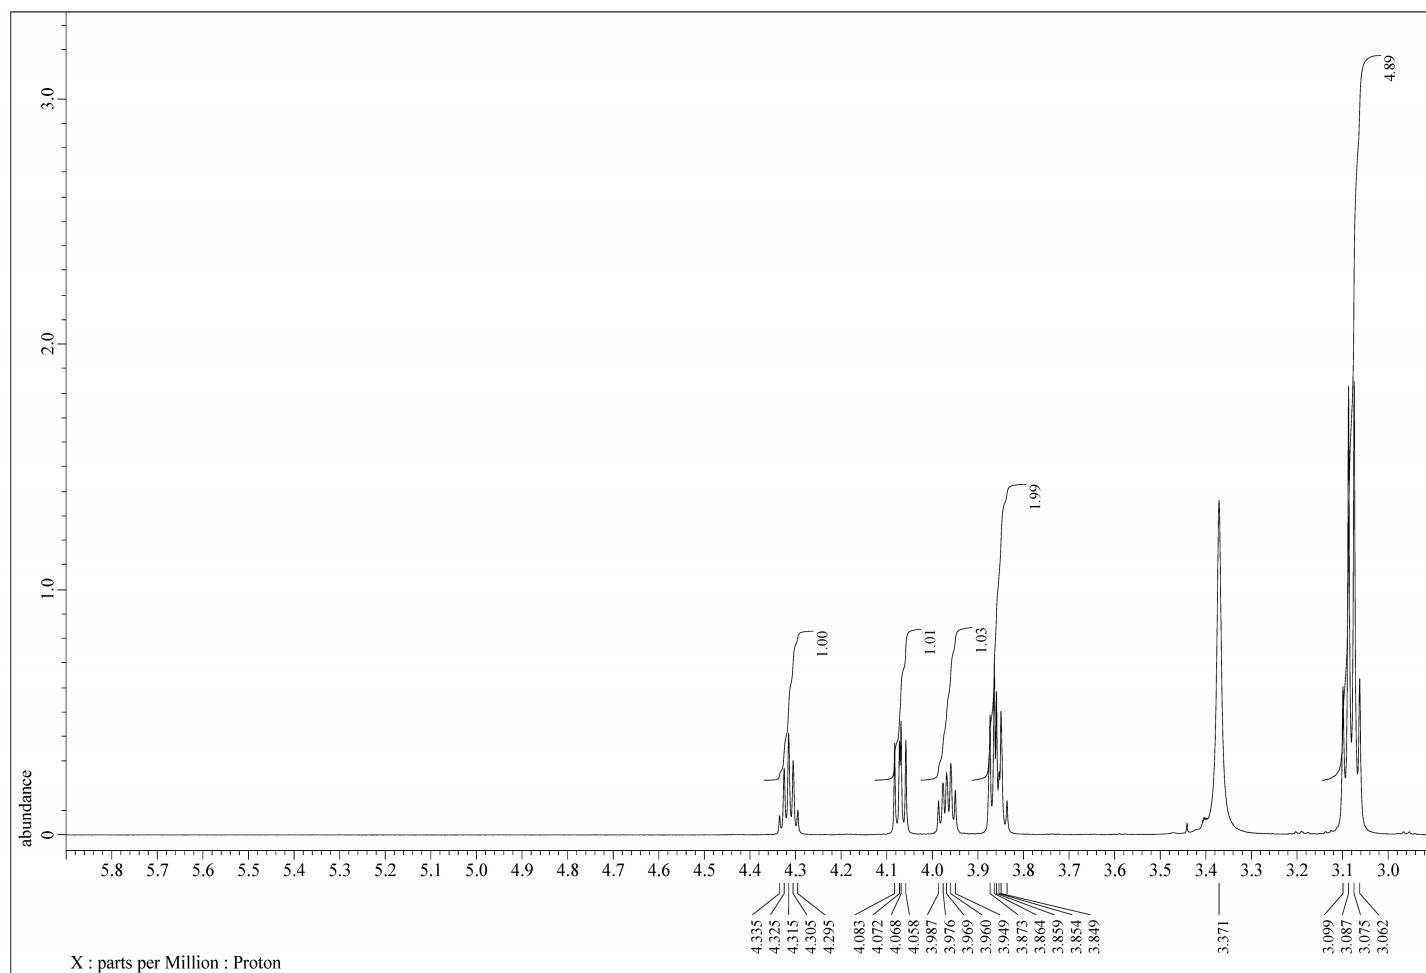

$^{13}\text{C}$ -NMR data of (*R*)-(2,2-dimethyl-1,3-dioxolan-4-yl)methyl hydrogen phosphate triethylammonium salt (**1**), 150 MHz,  $\text{CDCl}_3$ ,  $\text{CD}_3\text{OD}$  3%

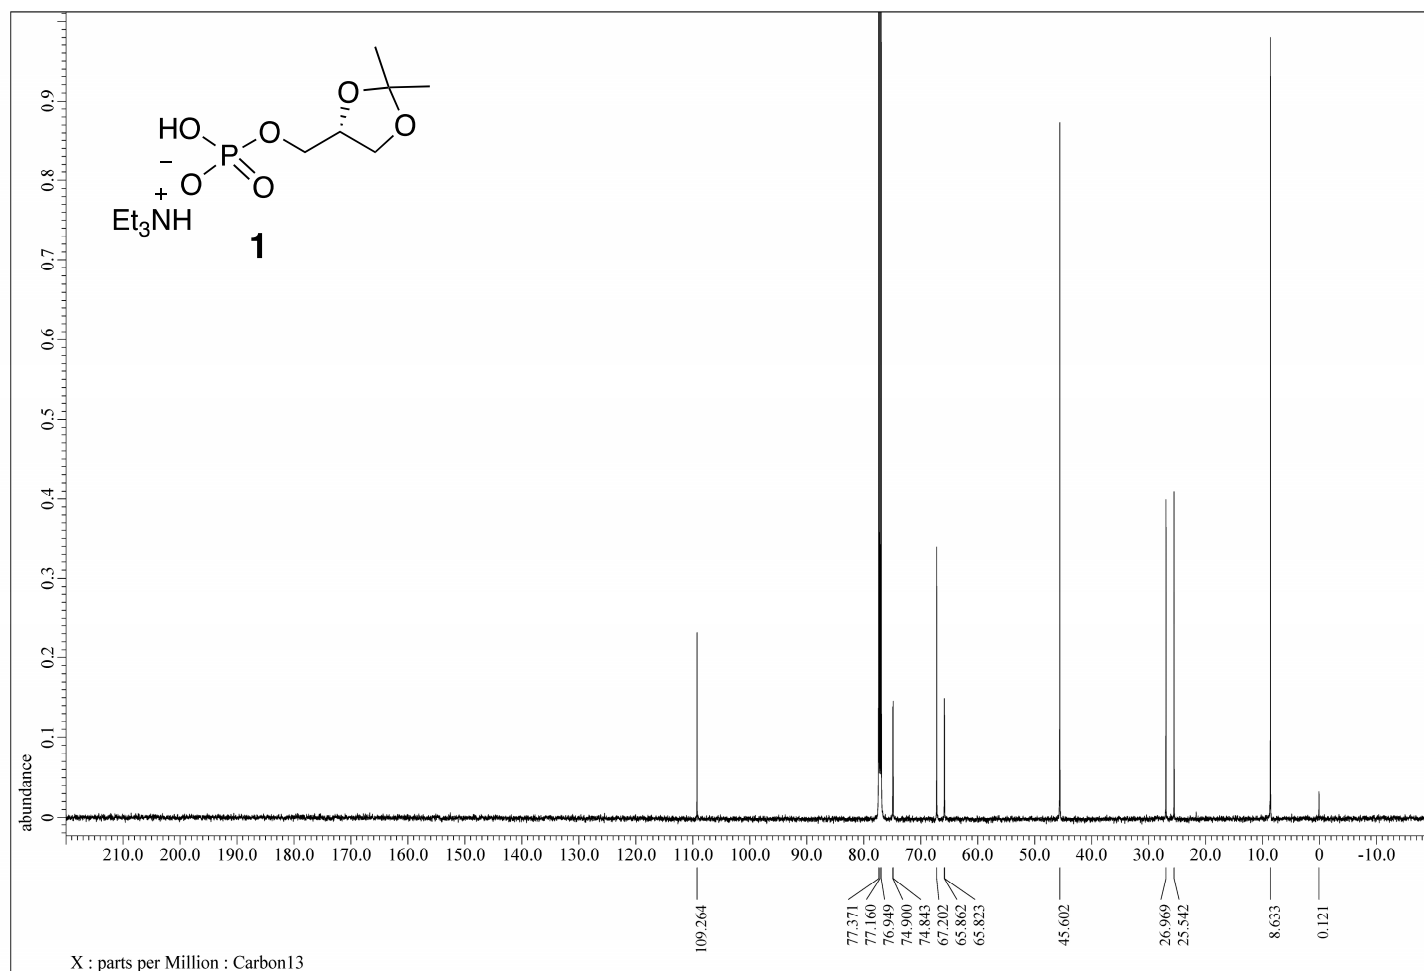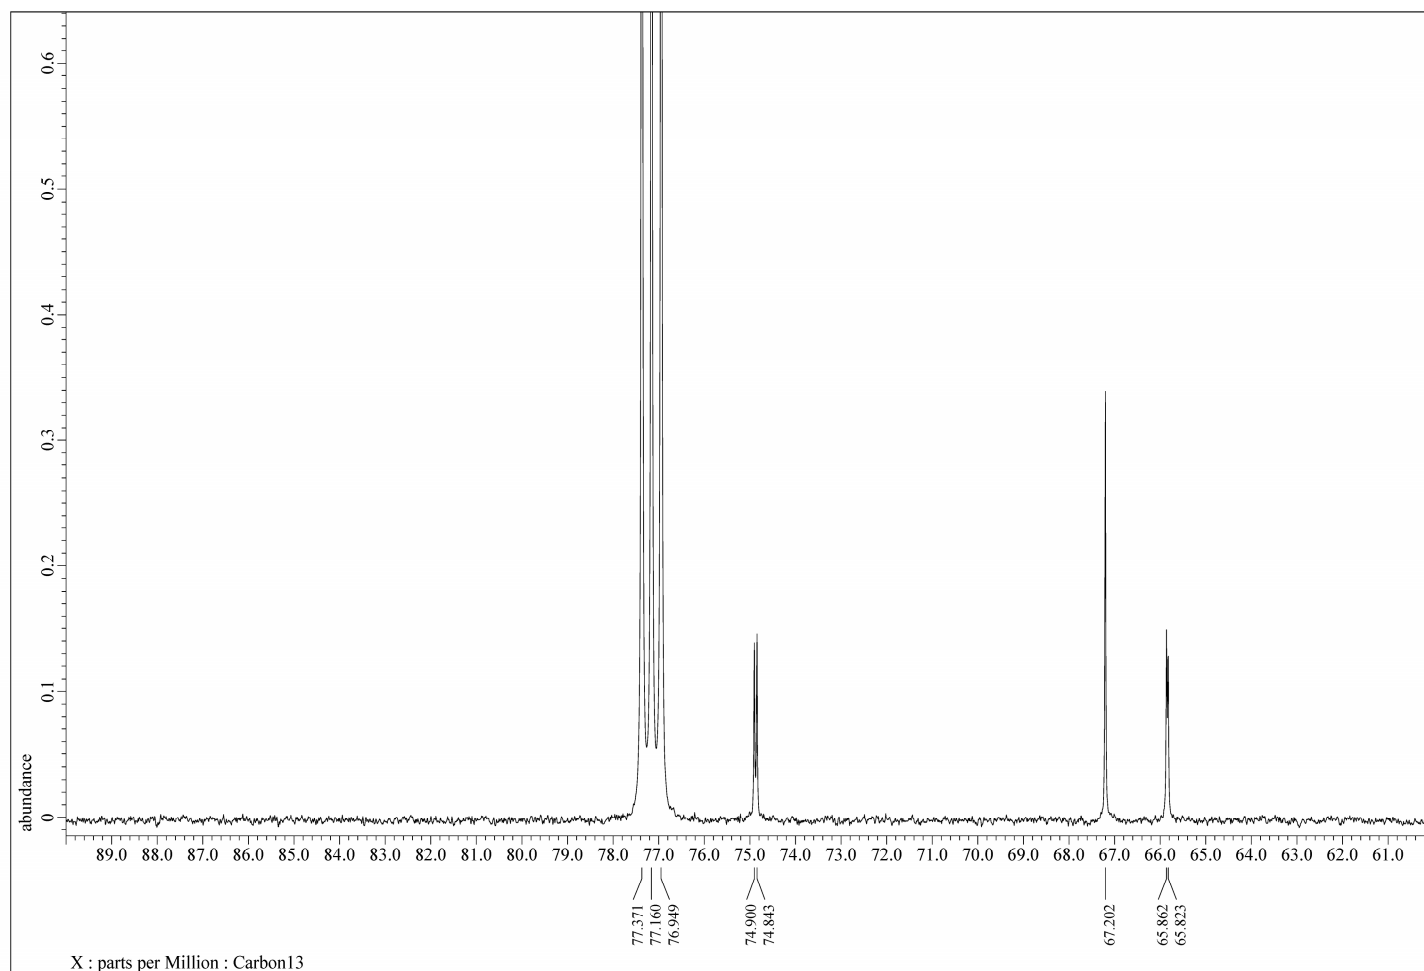

$^{31}\text{P}$ -NMR data of (*R*)-(2,2-dimethyl-1,3-dioxolan-4-yl)methyl hydrogen phosphate triethylammonium salt (**1**), 243 MHz,  $\text{CDCl}_3$ ,  $\text{CD}_3\text{OD}$  3%

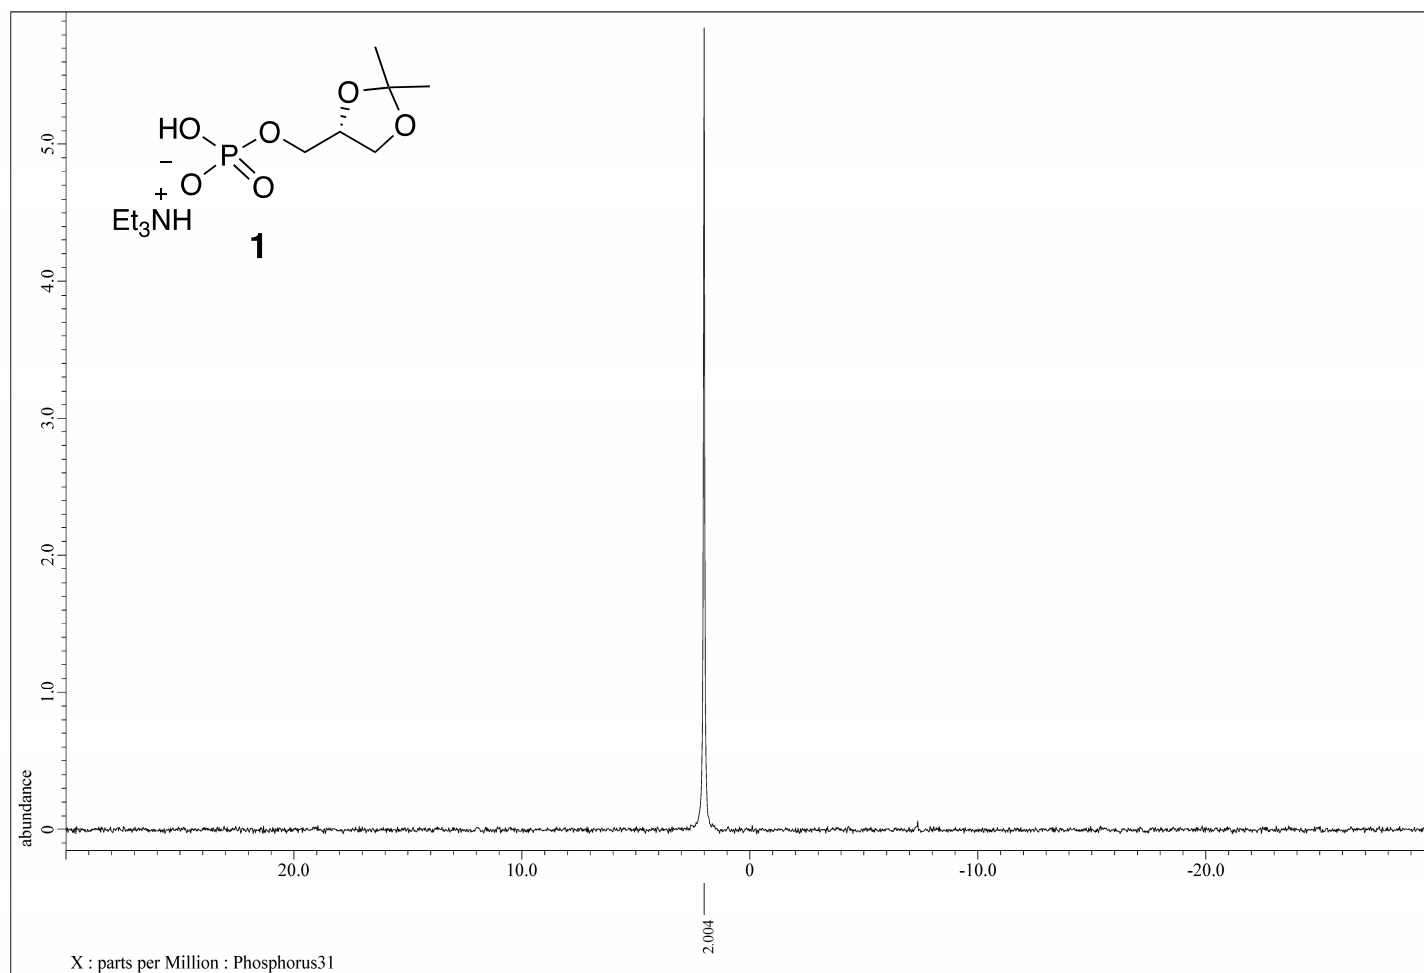

$^1\text{H}$ -NMR data of PA (18:0/18:0): 1, 2-di-O-stearyl-*sn*-glycerol-3-phosphate triethylammonium salt (**5**), 600 MHz,  $\text{CDCl}_3$ ,  $\text{CD}_3\text{OD}$  3%

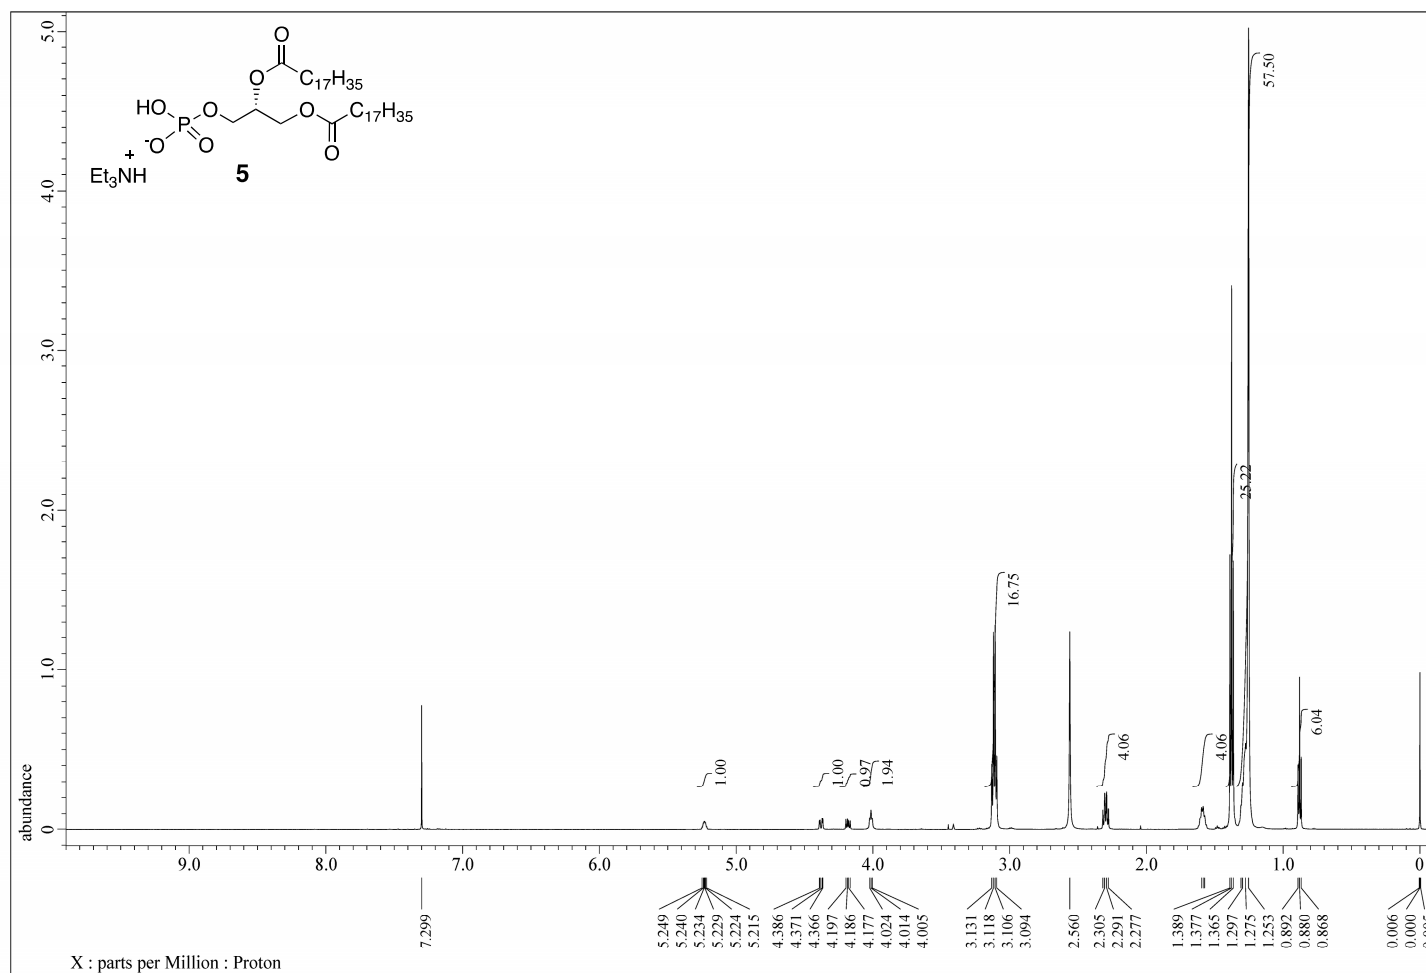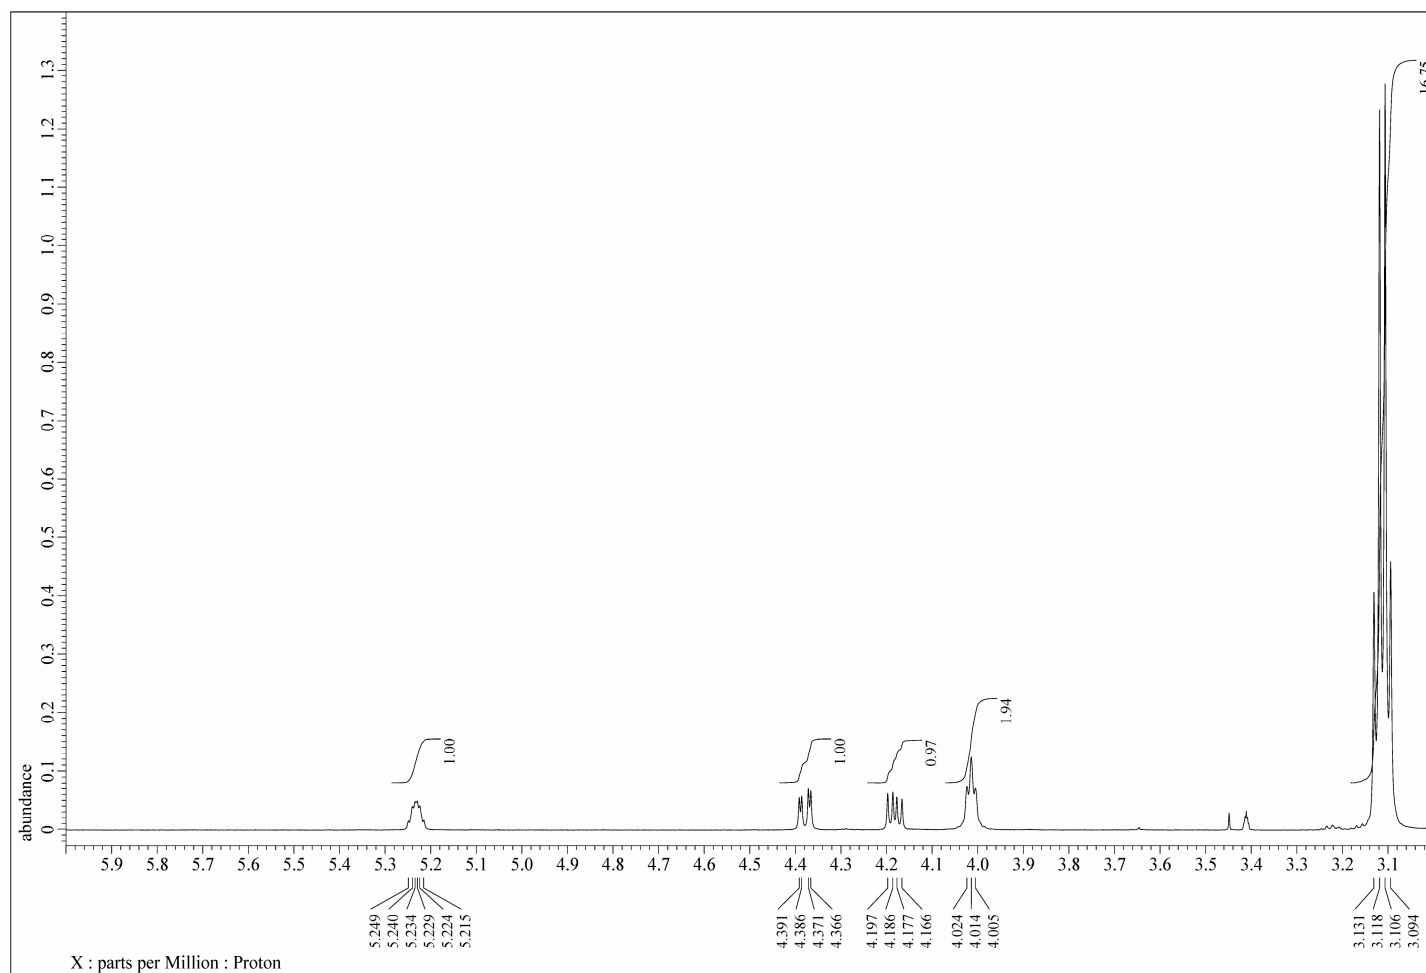

$^{13}\text{C}$ -NMR data of PA (18:0/18:0): 1, 2-di-*O*-stearyl-*sn*-glycerol-3-phosphate triethylammonium salt (**5**), 150 MHz,  $\text{CDCl}_3$ ,  $\text{CD}_3\text{OD}$  3%

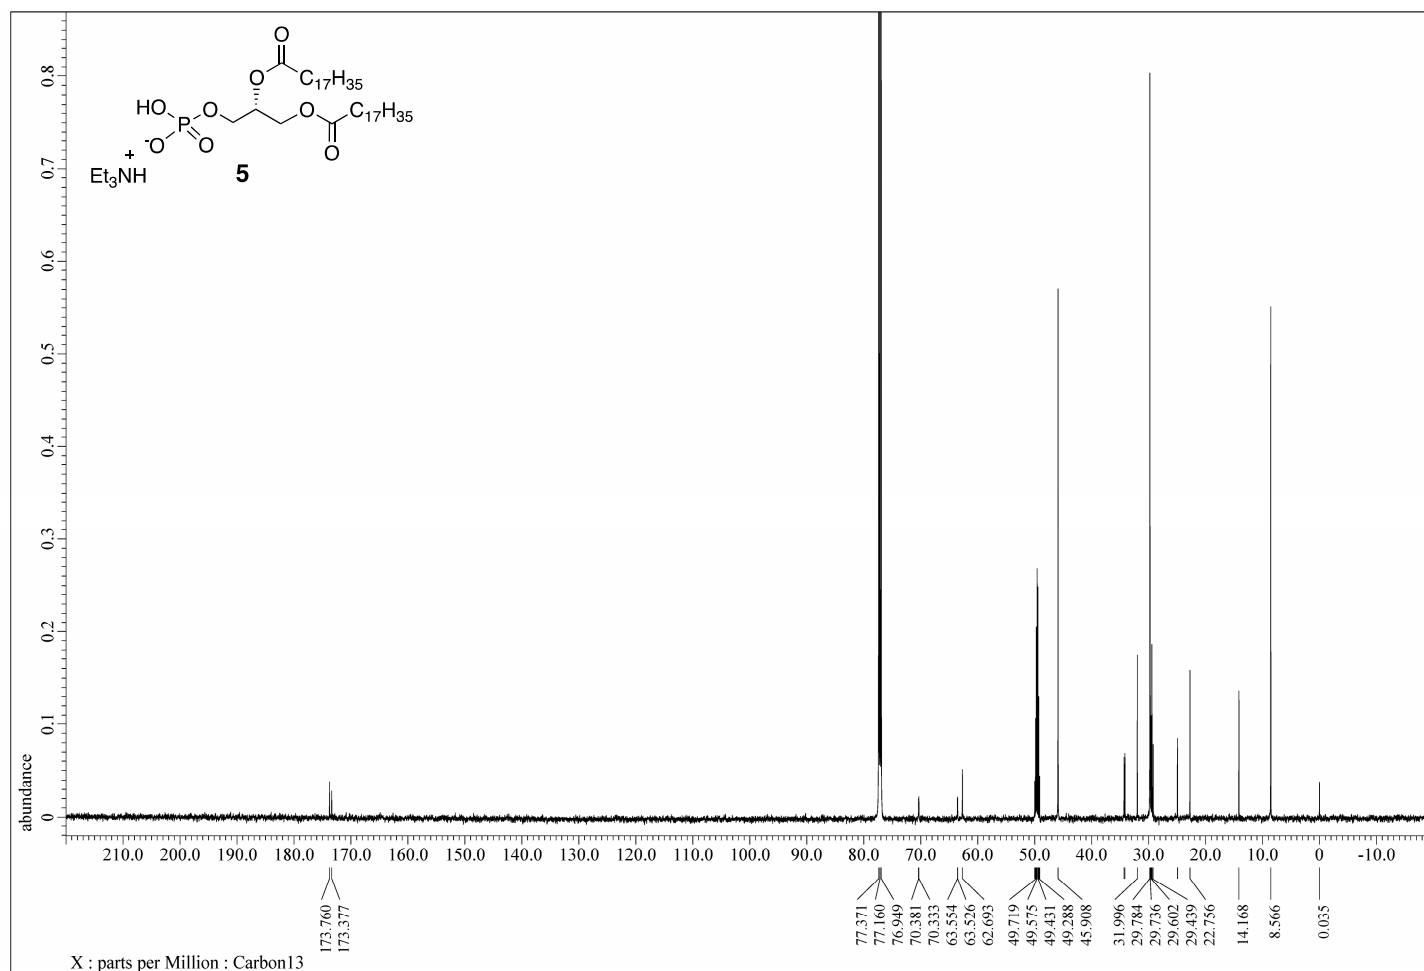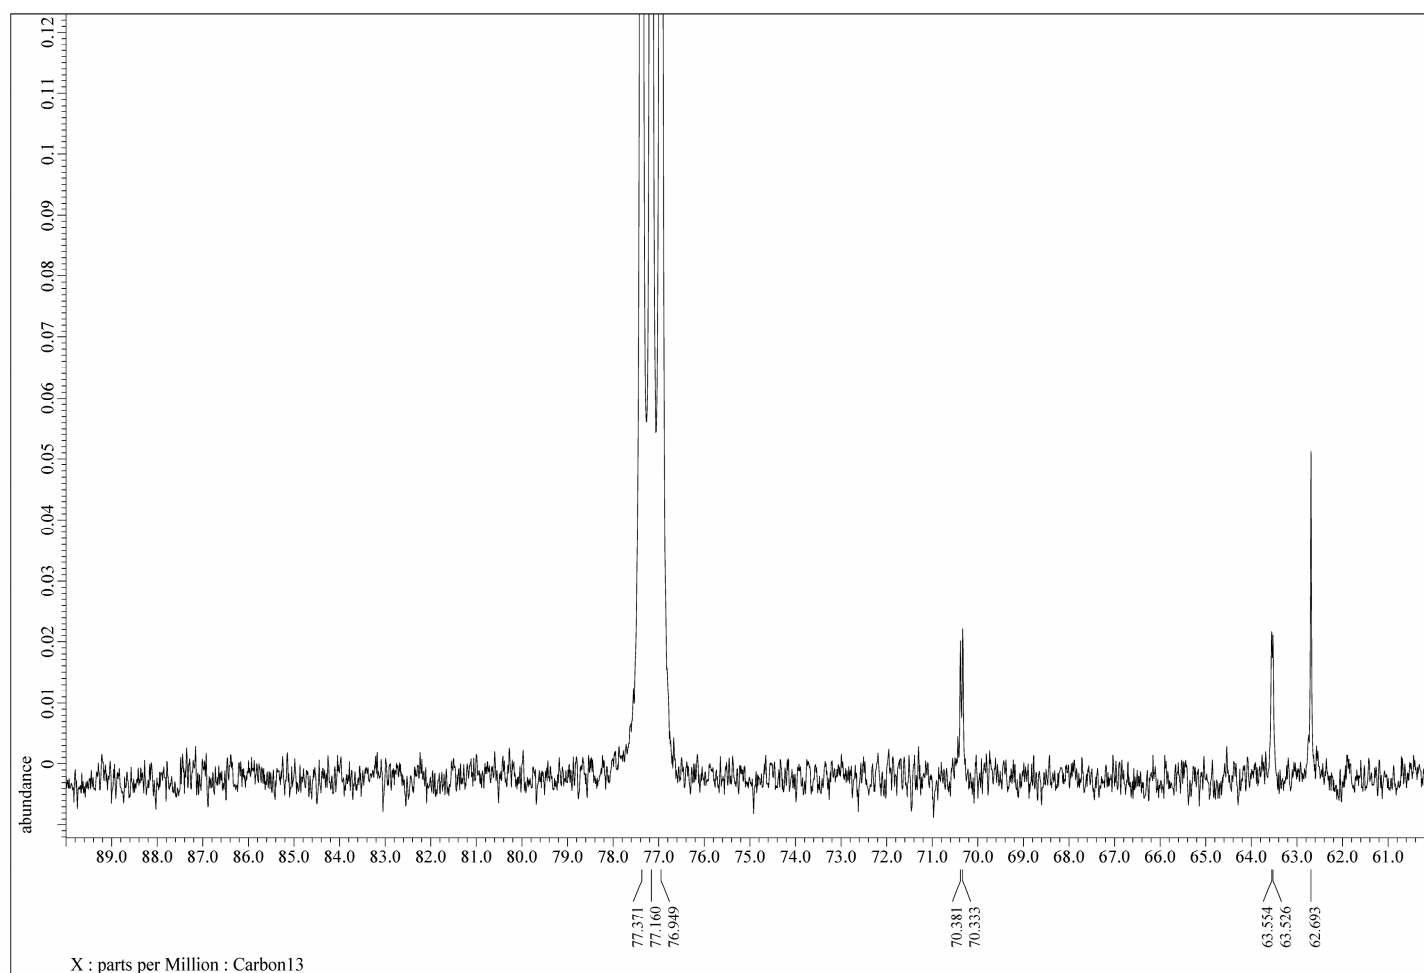

$^{31}\text{P}$ -NMR data of PA (18:0/18:0): 1, 2-di-*O*-stearyl-*sn*-glycerol-3-phosphate triethylammonium salt (**5**), 243 MHz,  $\text{CDCl}_3$ ,  $\text{CD}_3\text{OD}$  3%

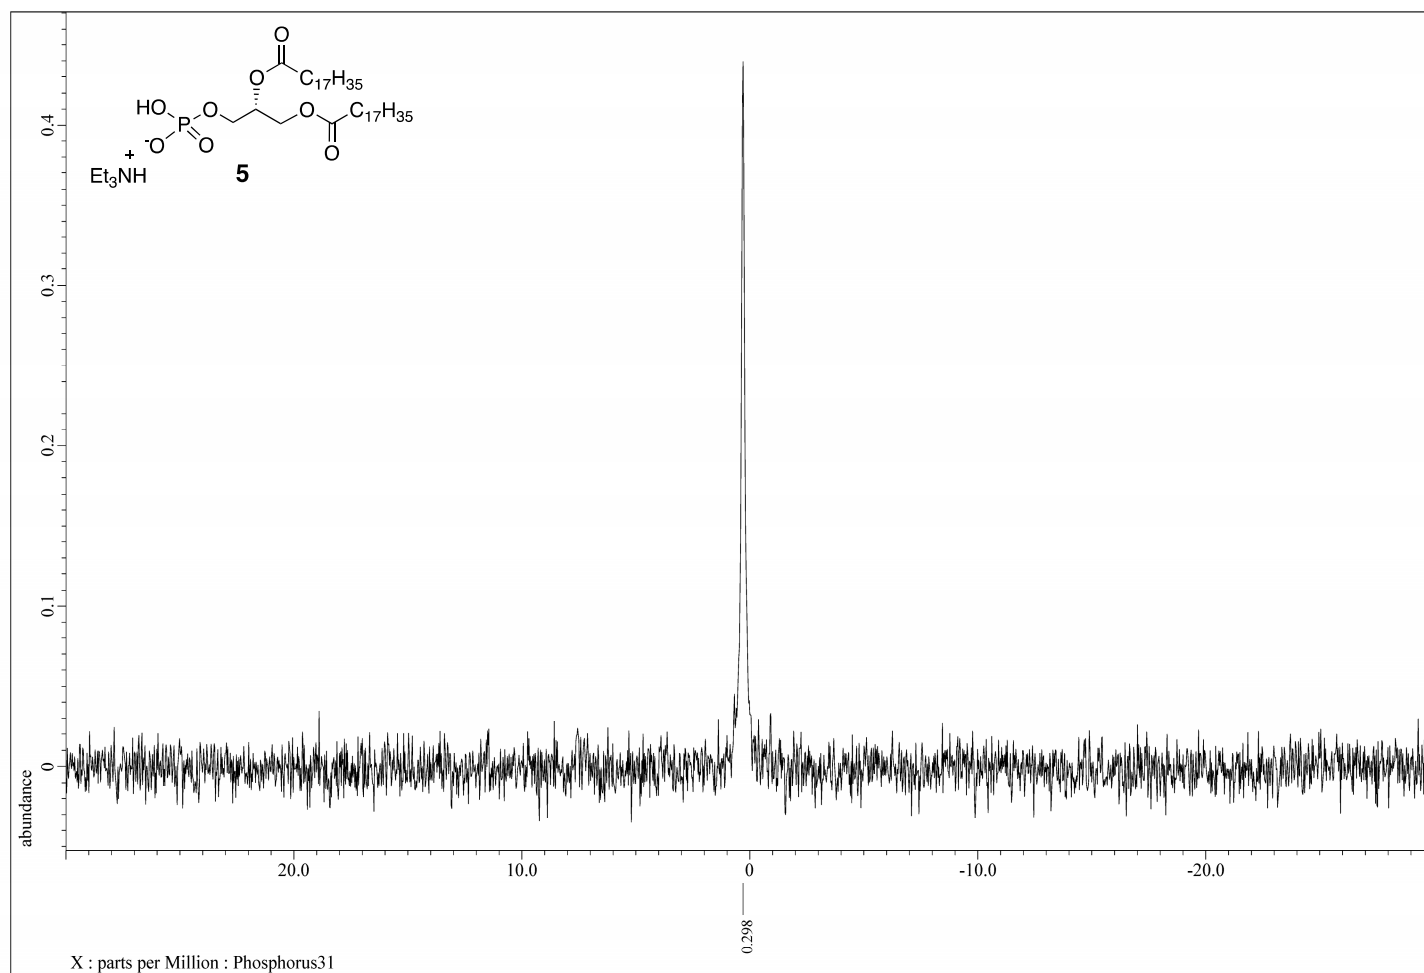

$^1\text{H}$ -NMR data of PA (18:1/18:1): 1, 2-di-*O*-oleoyl-*sn*-glycerol-3-phosphate triethylammonium salt (**7**), 600 MHz,  $\text{CDCl}_3$ ,  $\text{CD}_3\text{OD}$  3%

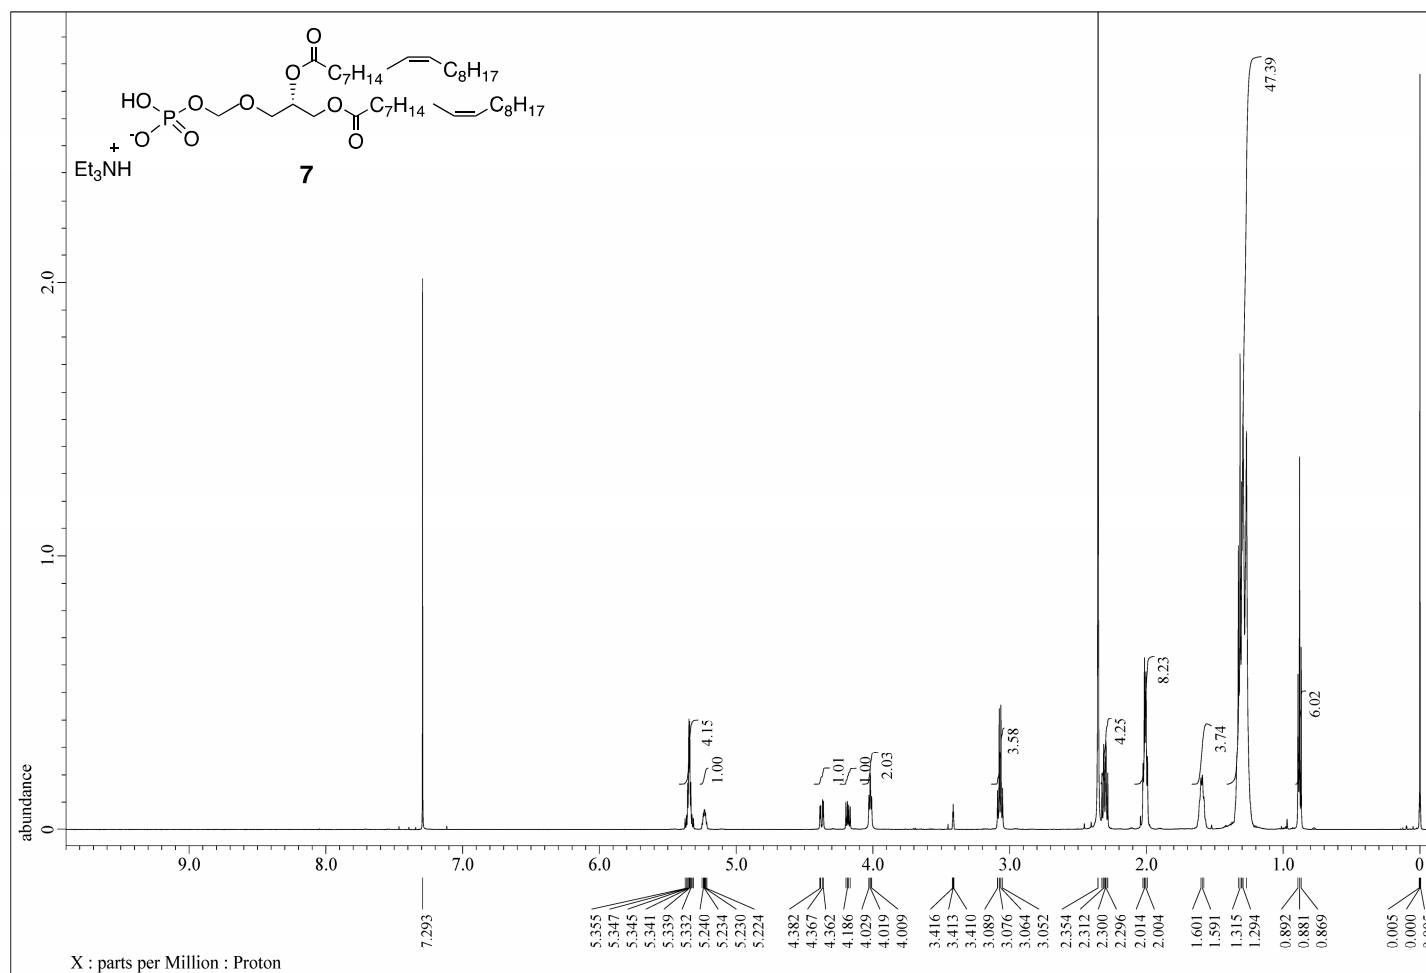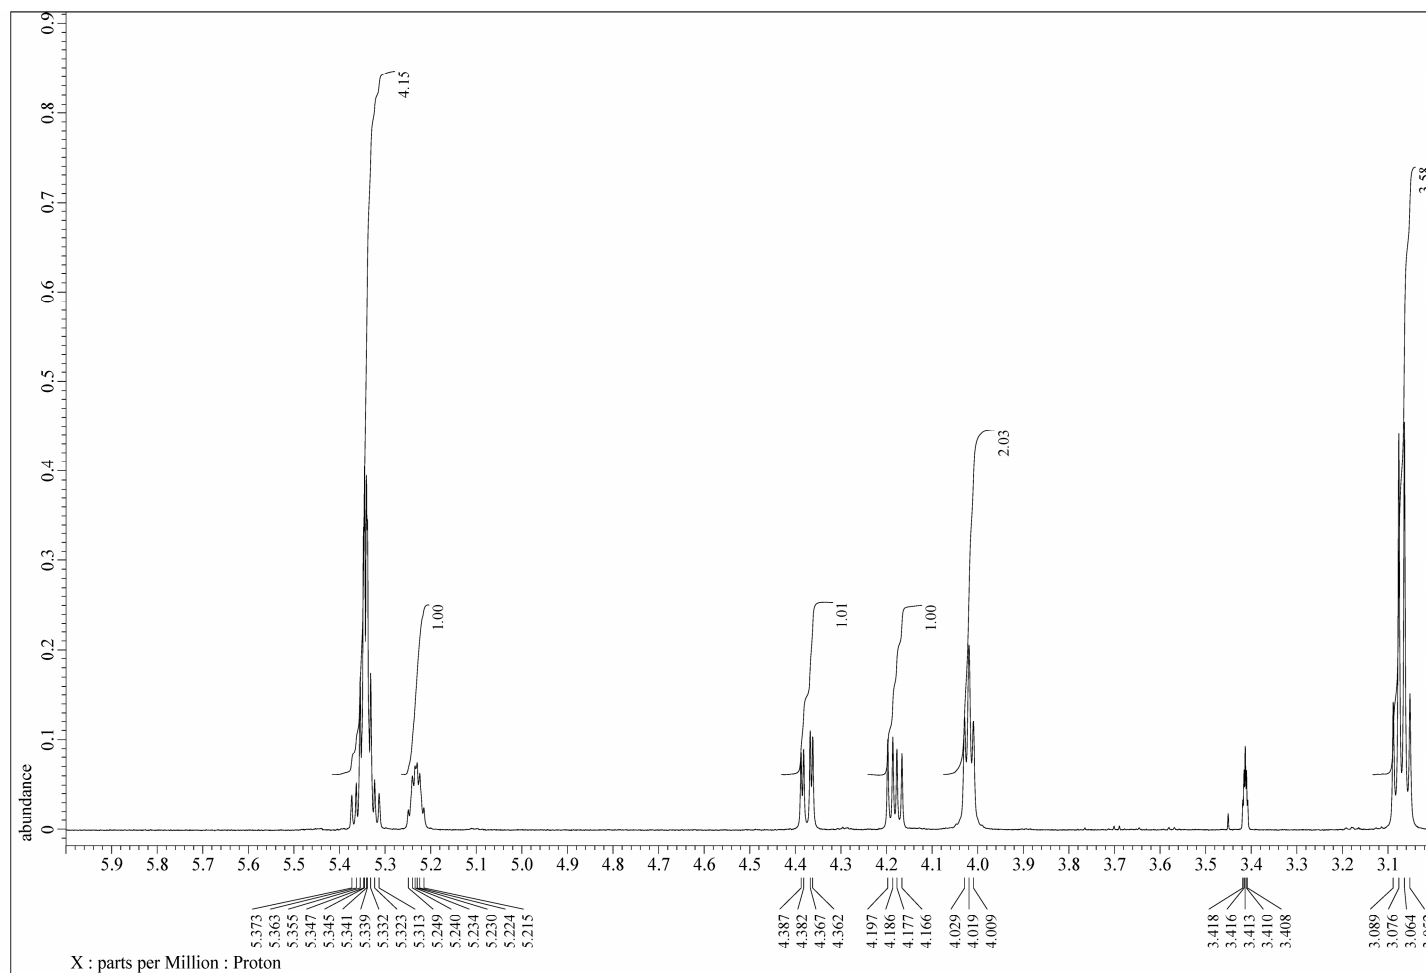



$^{13}\text{C}$ -NMR data of PA (18:1/18:1): 1, 2-di-*O*-oleoyl-*sn*-glycerol-3-phosphate triethylammonium salt (**7**), 150 MHz,  $\text{CDCl}_3$ ,  $\text{CD}_3\text{OD}$  3%

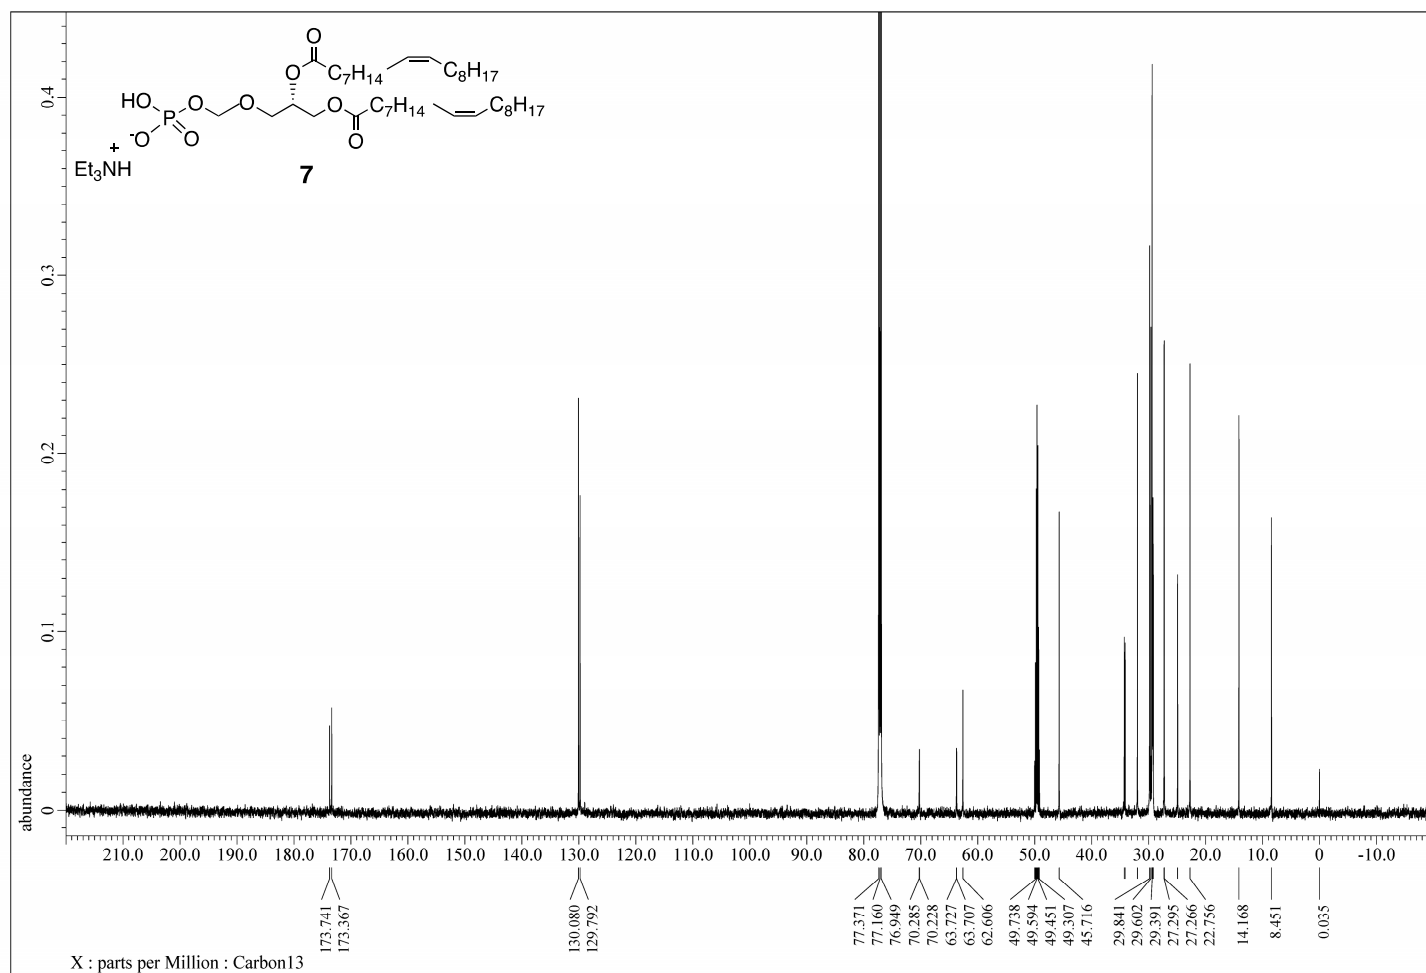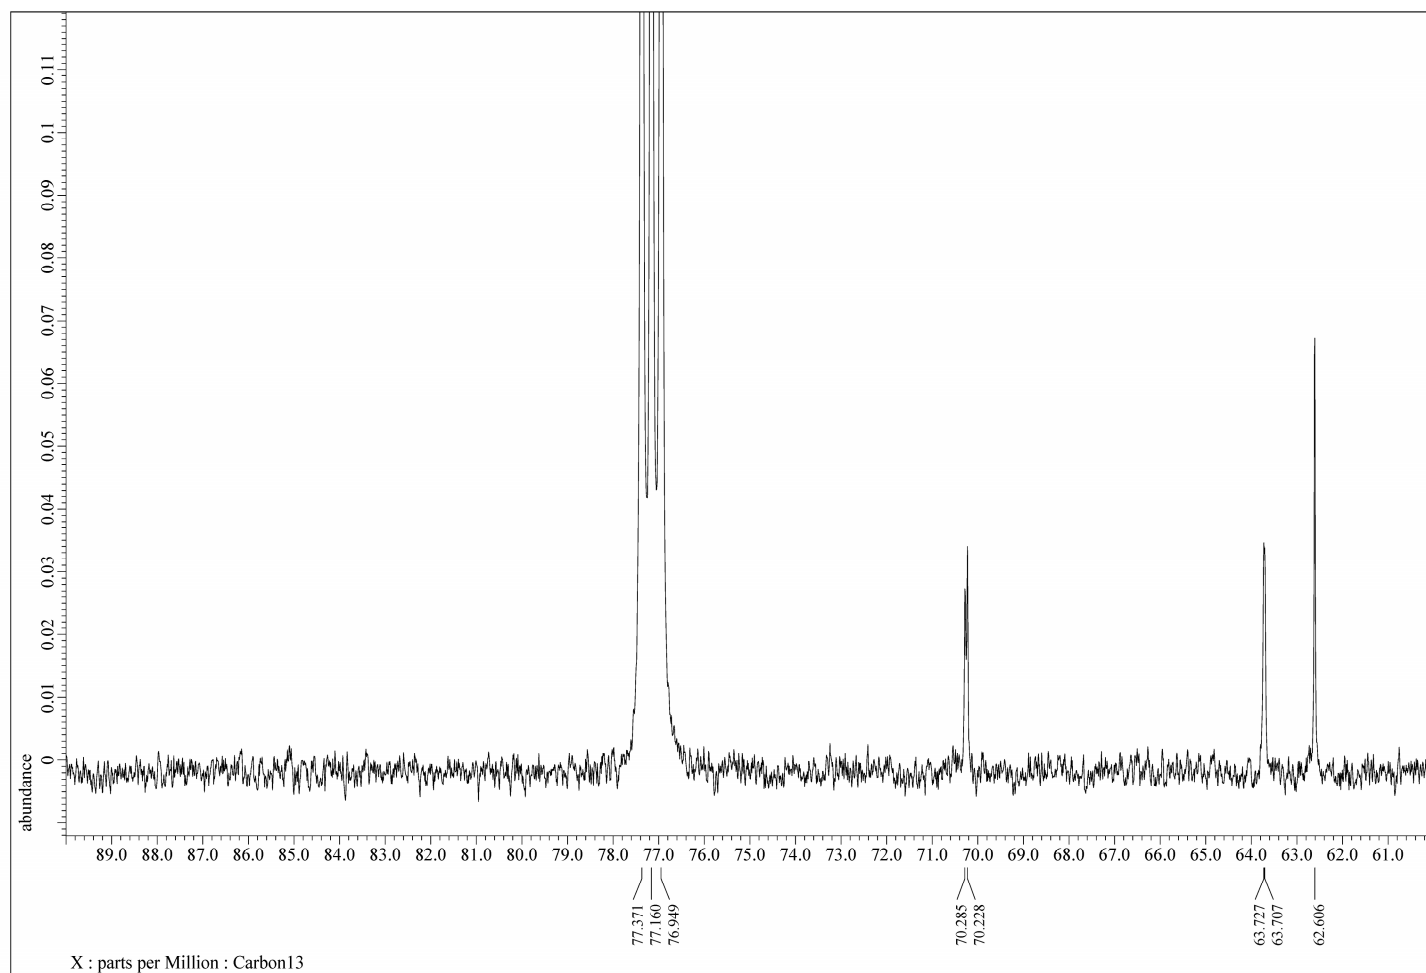

$^{31}\text{P}$ -NMR data of PA (18:1/18:1): 1, 2-di-*O*-oleoyl-*sn*-glycerol-3-phosphate triethylammonium salt (**7**), 243 MHz,  $\text{CDCl}_3$ ,  $\text{CD}_3\text{OD}$  3%

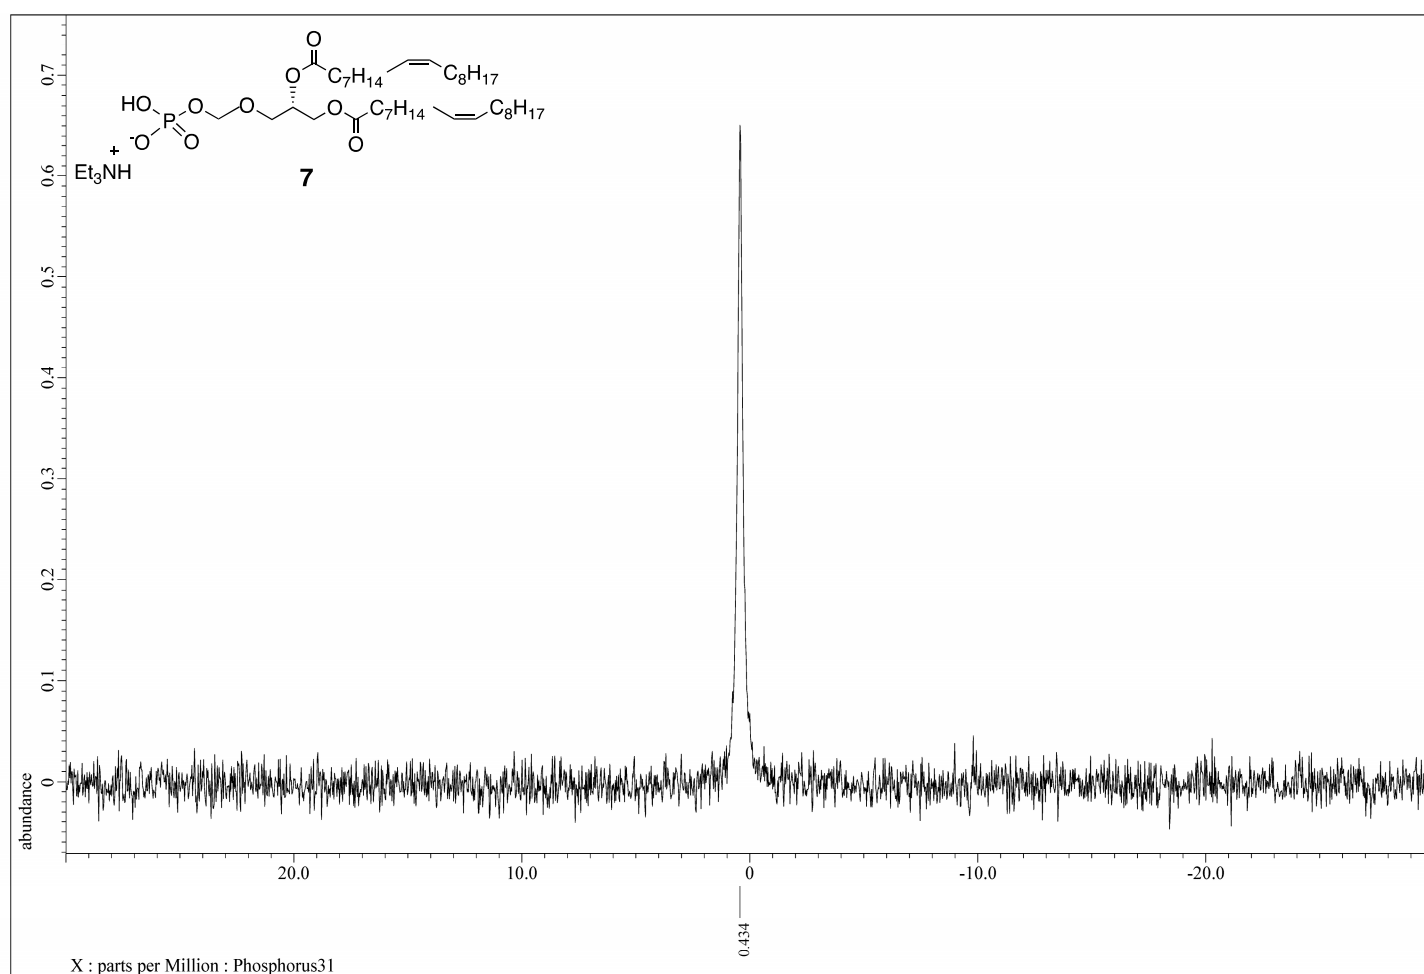

$^1\text{H}$ -NMR data of PA (18:0/16:0): 1-O-stearoyl-2-O-palmitoyl-*sn*-glycerol-3-phosphate triethylammonium salt (**9**) , 600 MHz,  $\text{CDCl}_3$ ,  $\text{CD}_3\text{OD}$  3%

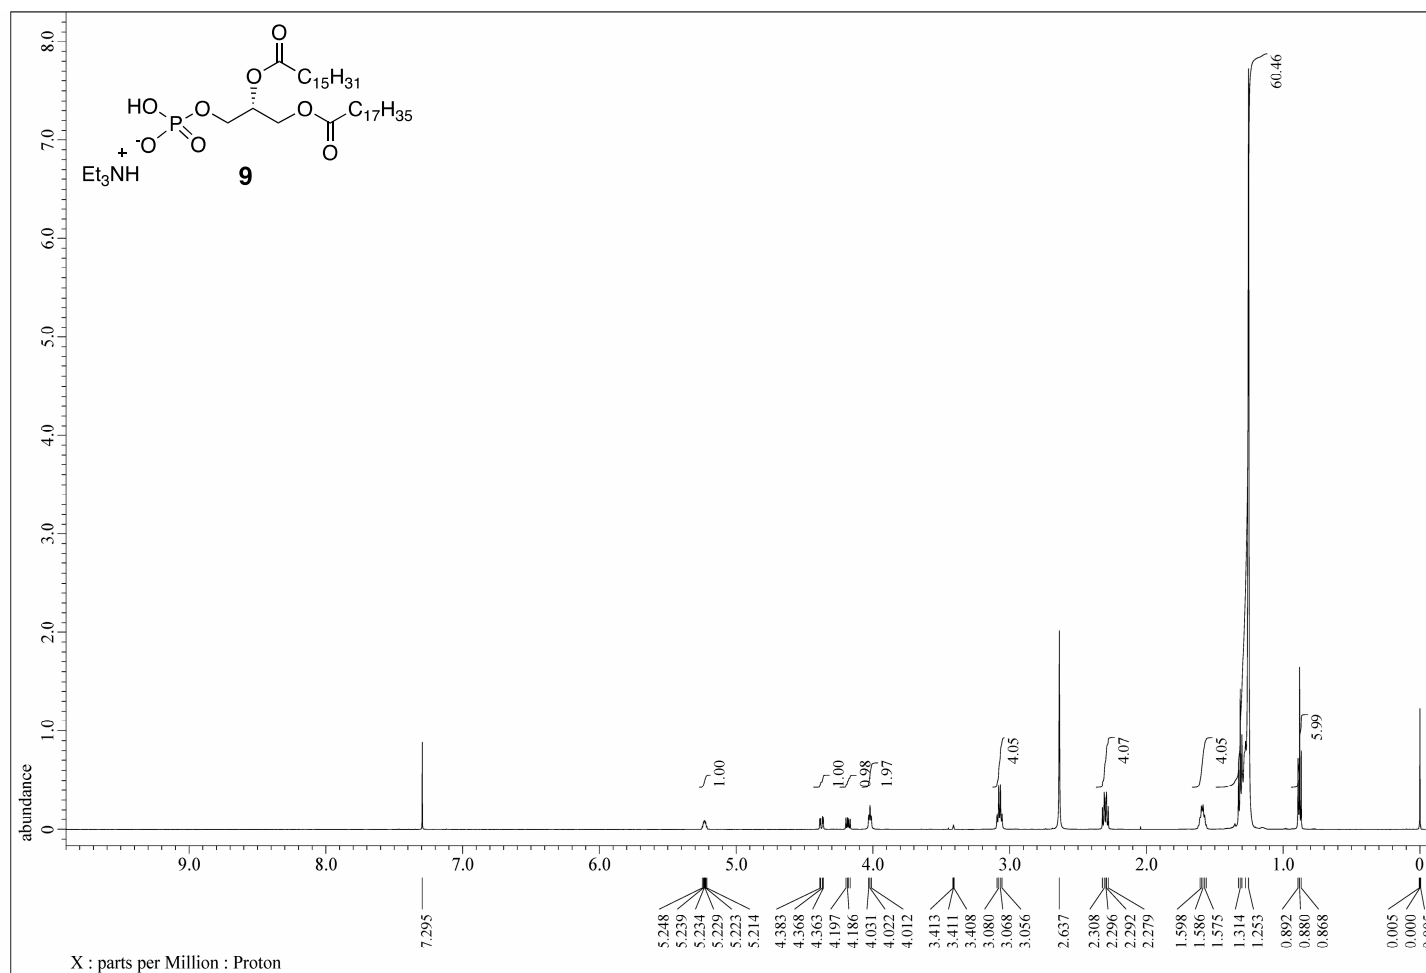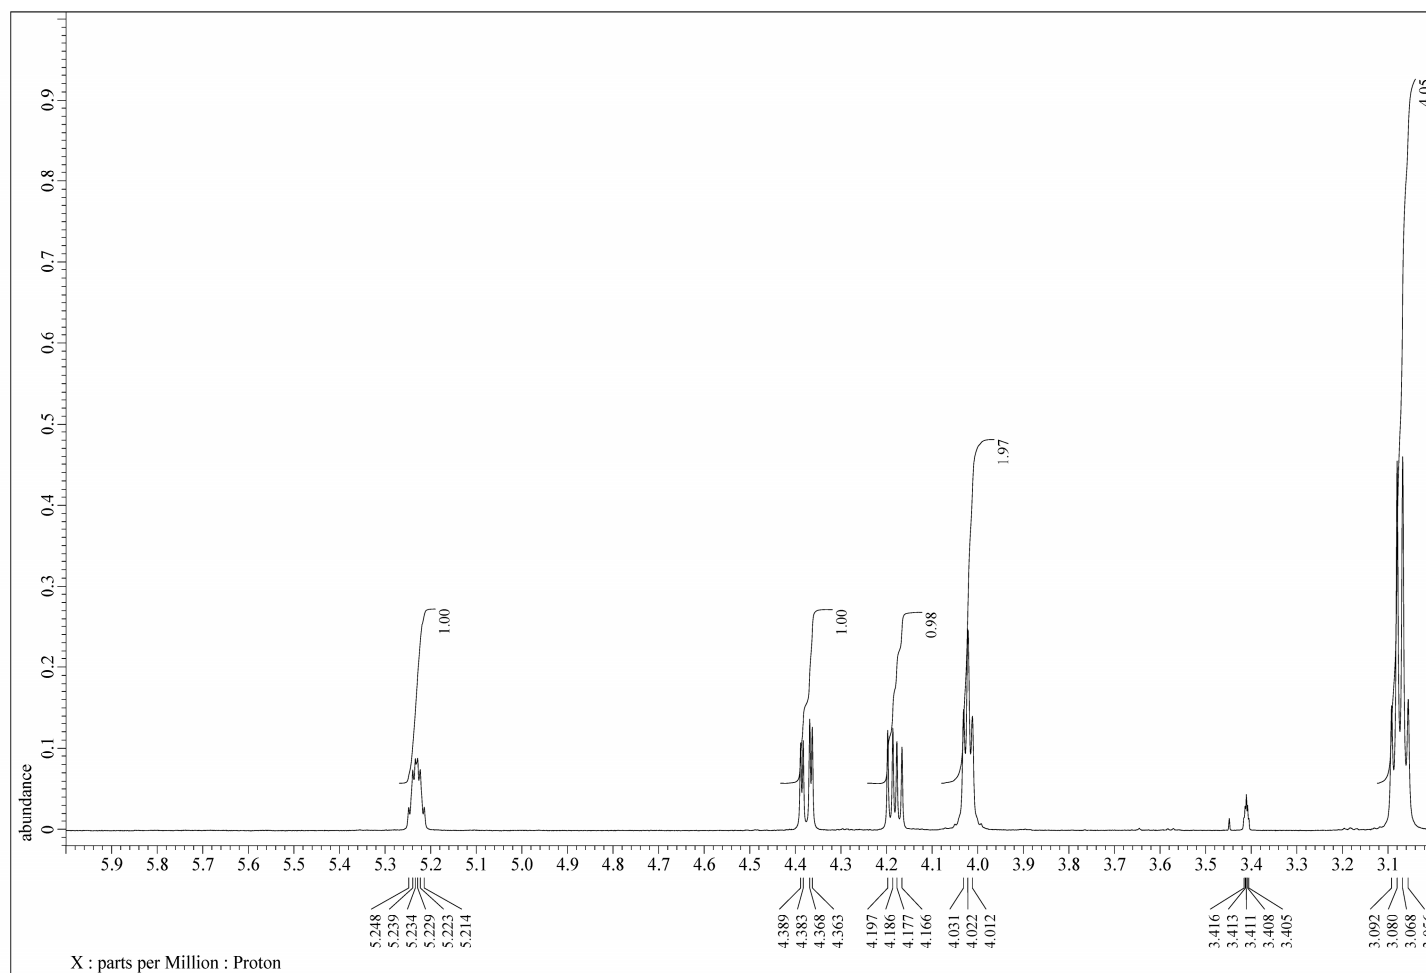

$^{13}\text{C}$ -NMR data of PA (18:0/16:0): 1-O-stearoyl-2-O-palmitoyl-*sn*-glycerol-3-phosphate triethylammonium salt (**9**), 150 MHz,  $\text{CDCl}_3$ ,  $\text{CD}_3\text{OD}$  3%

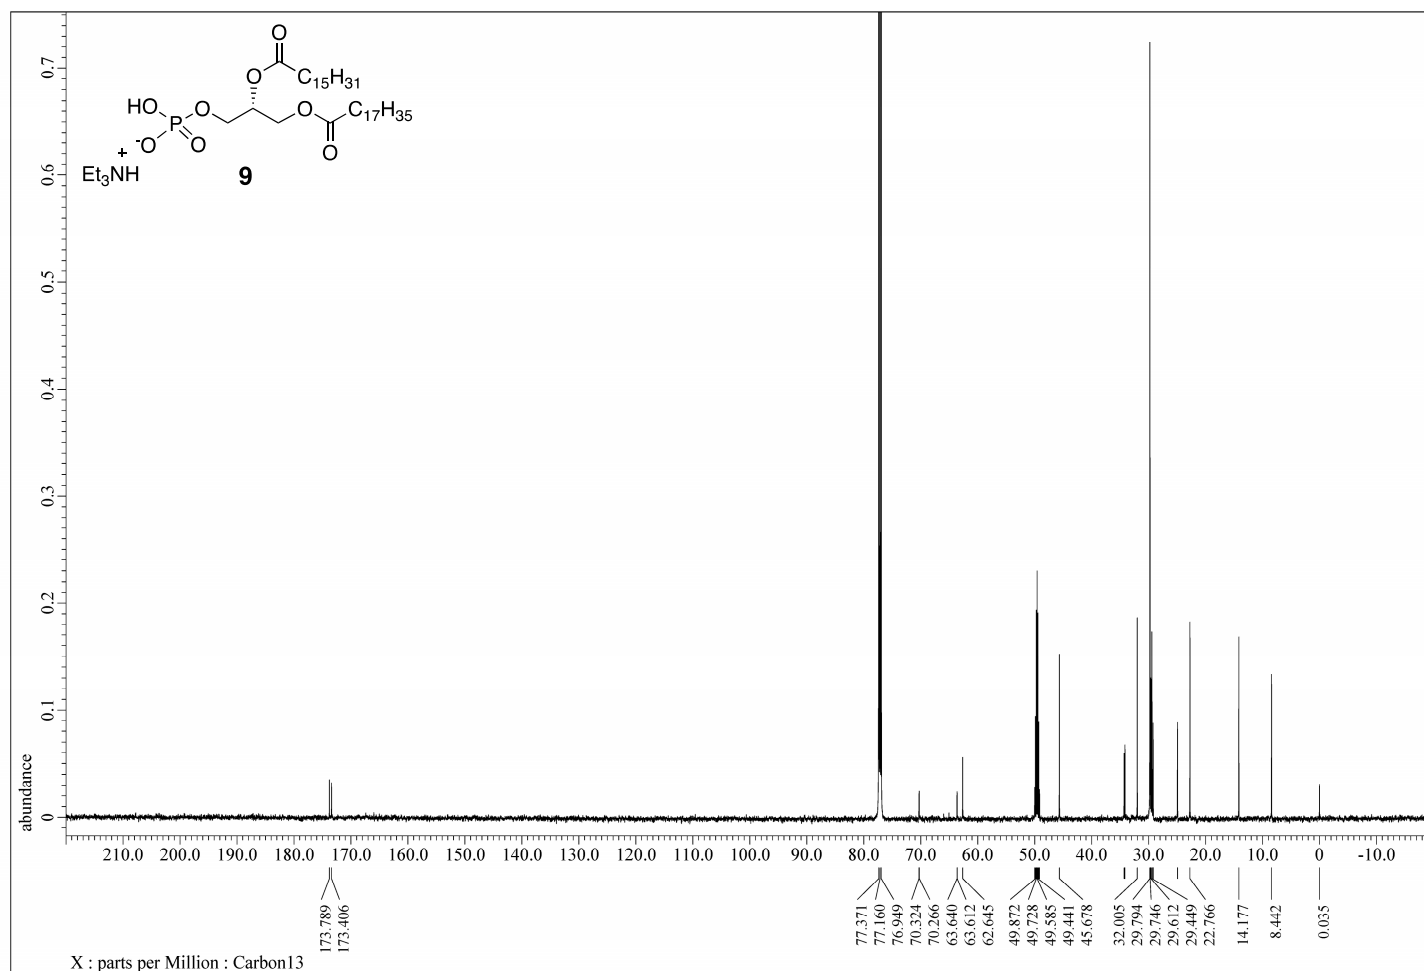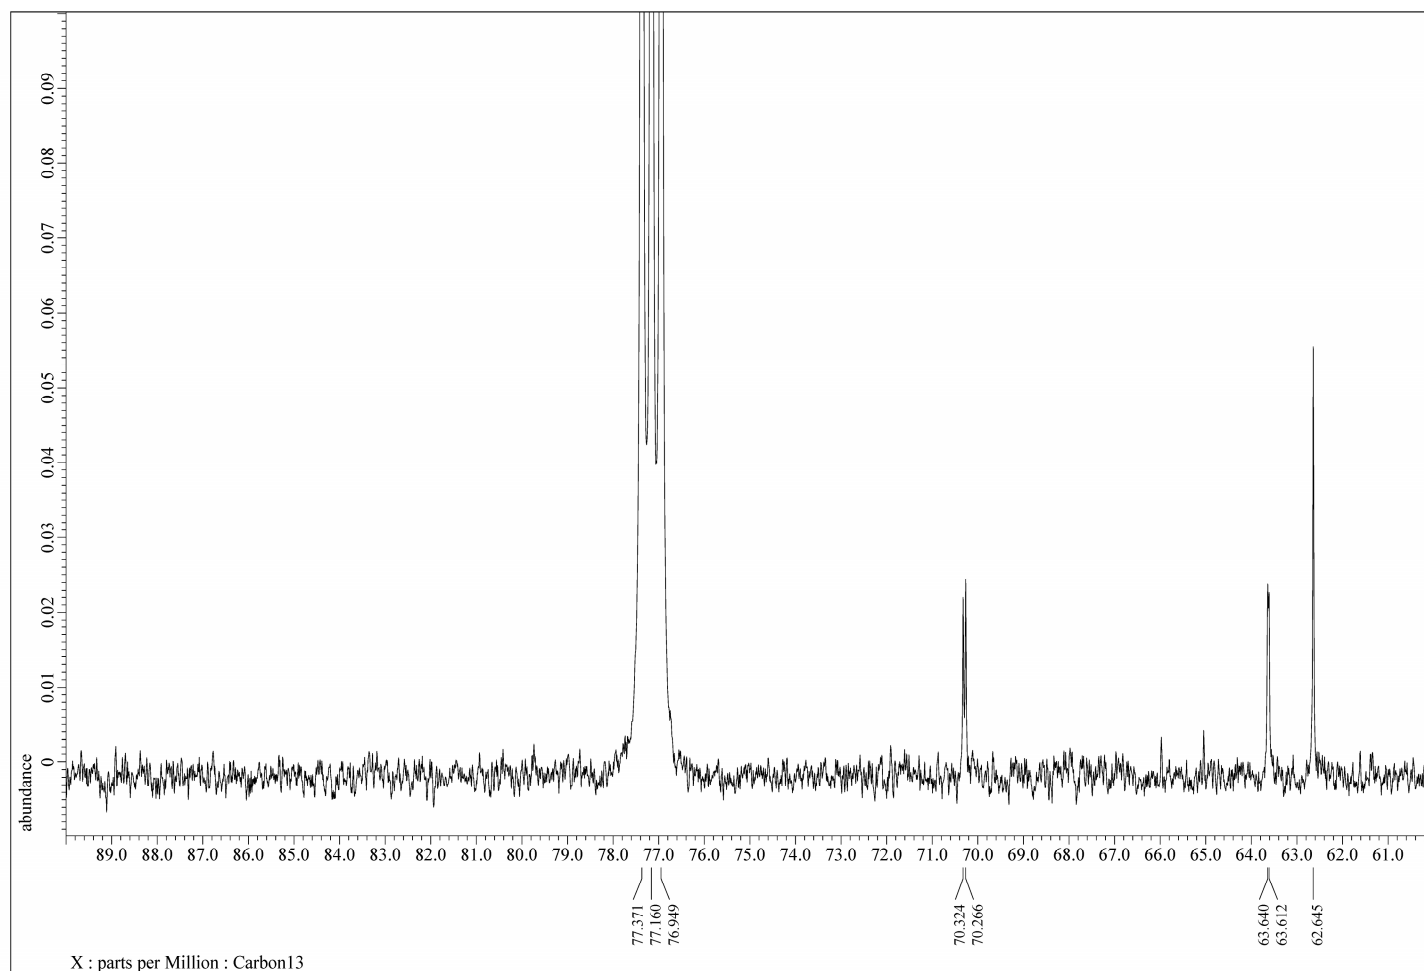

$^{31}\text{P}$ -NMR data of PA (18:0/16:0): 1-*O*-stearoyl-2-*O*-palmitoyl-*sn*-glycerol-3-phosphate triethylammonium salt (**9**), 243 MHz,  $\text{CDCl}_3$ ,  $\text{CD}_3\text{OD}$  3%

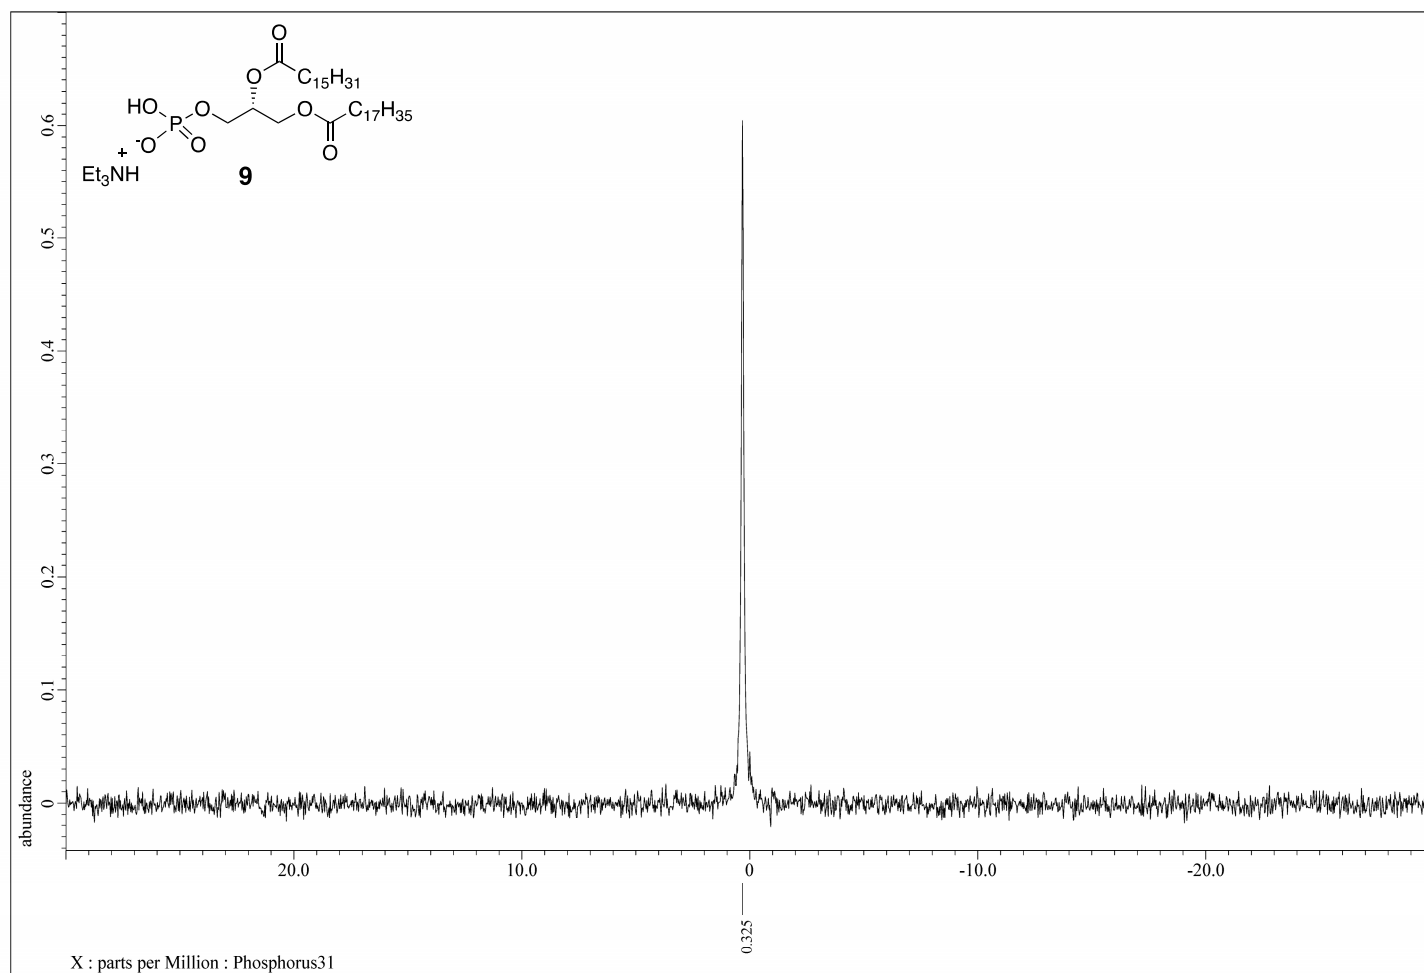

<sup>1</sup>H-NMR data of PA (16:0/18:0): 1-O-palmitoyl-2-O-stearoyl-*sn*-glycerol-3-phosphate triethylammonium salt (**11**), 600 MHz, CDCl<sub>3</sub>, CD<sub>3</sub>OD 3%

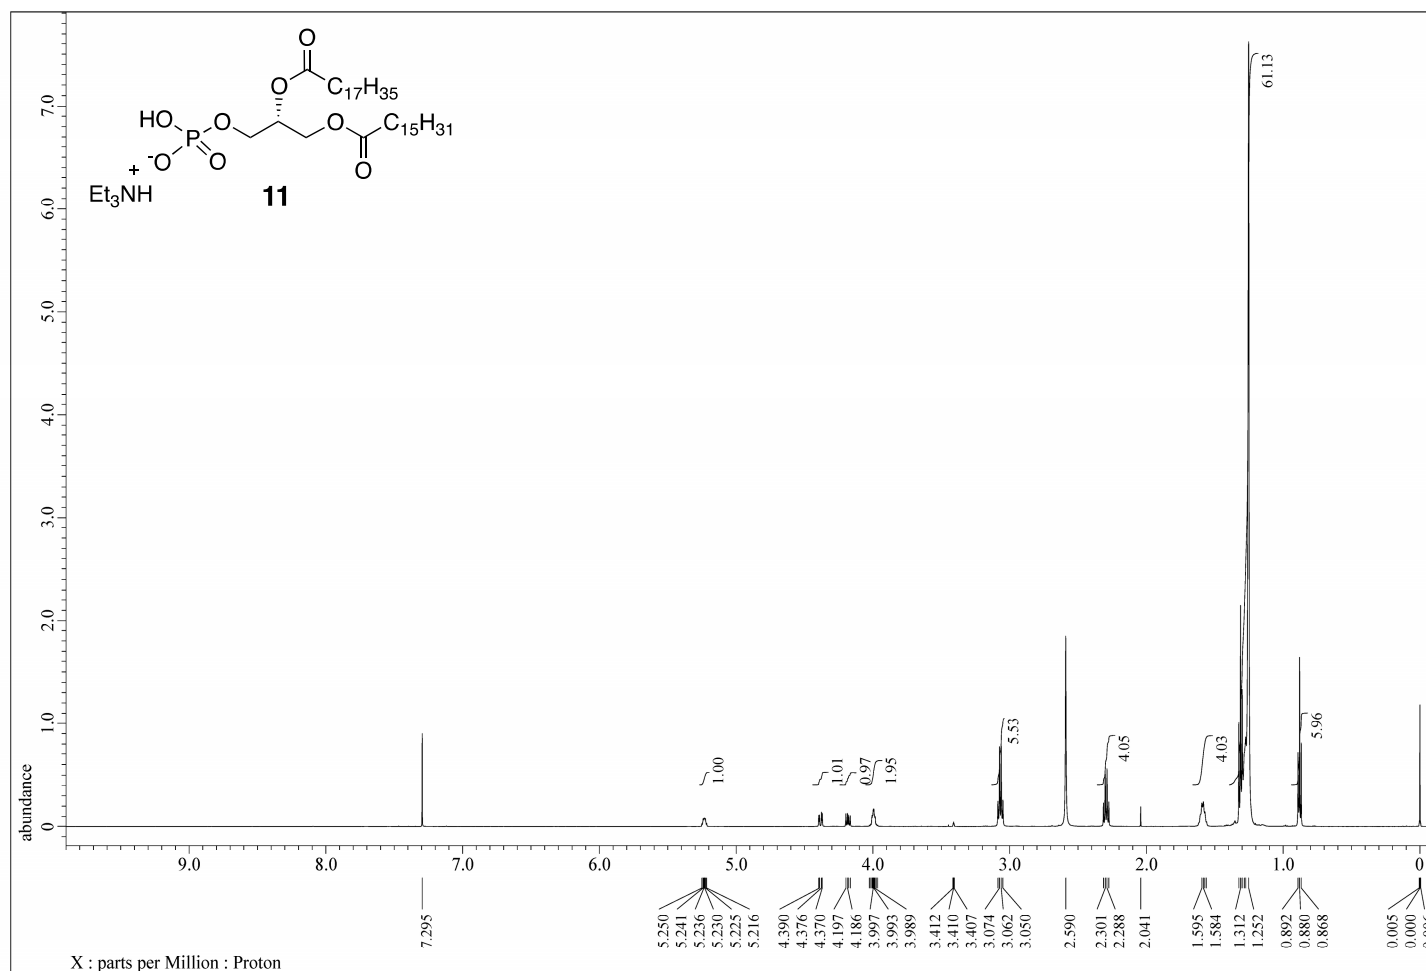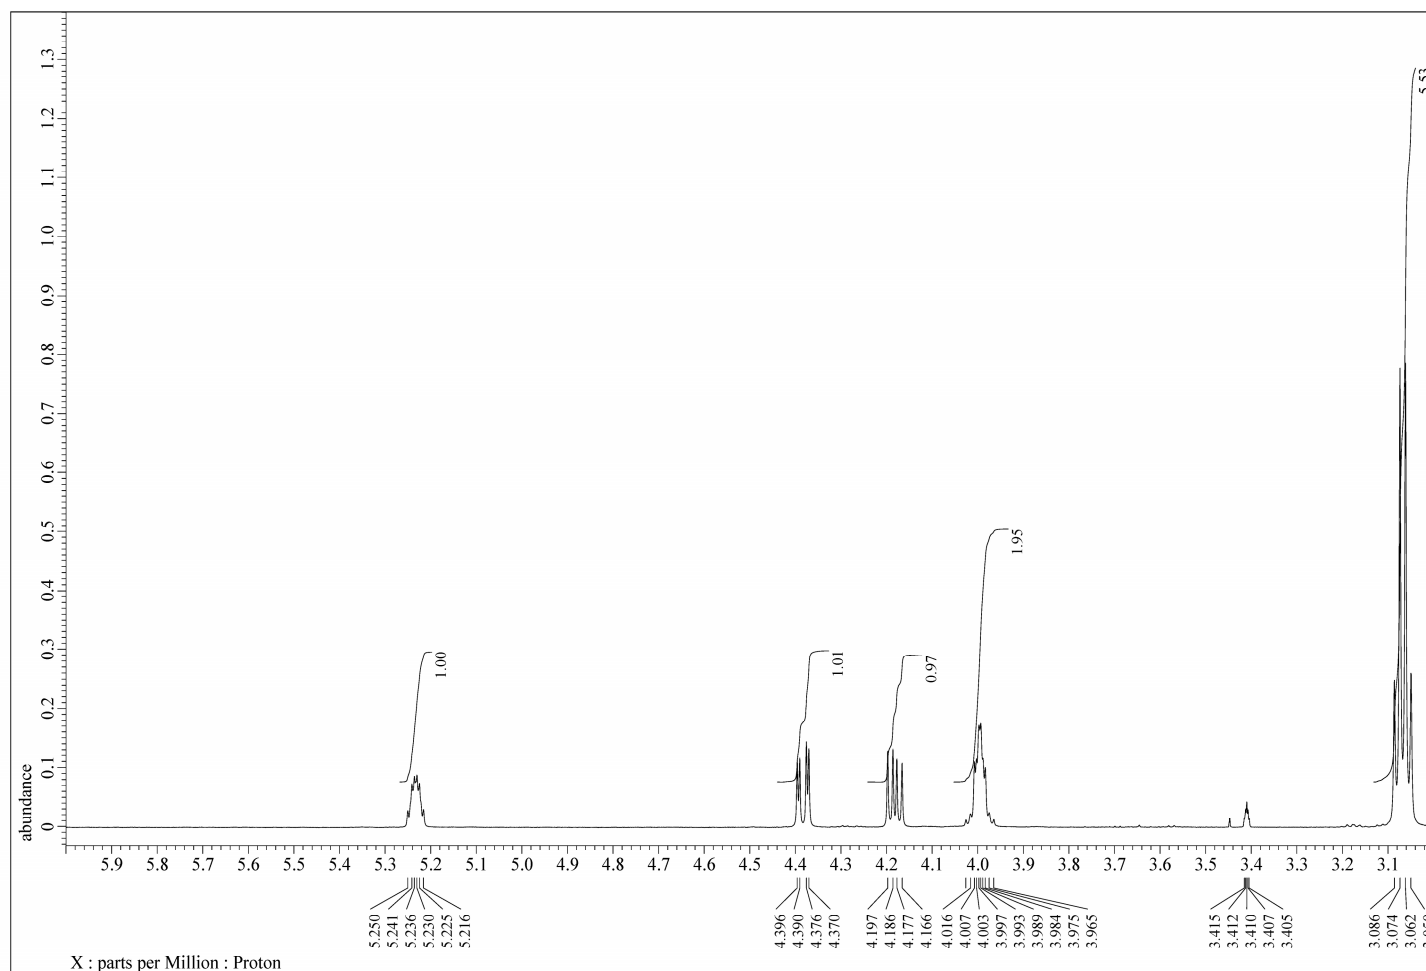

$^{13}\text{C}$ -NMR data of PA (16:0/18:0): 1-O-palmitoyl-2-O-stearoyl-*sn*-glycerol-3-phosphate triethylammonium salt (**11**), 150 MHz,  $\text{CDCl}_3$ ,  $\text{CD}_3\text{OD}$  3%

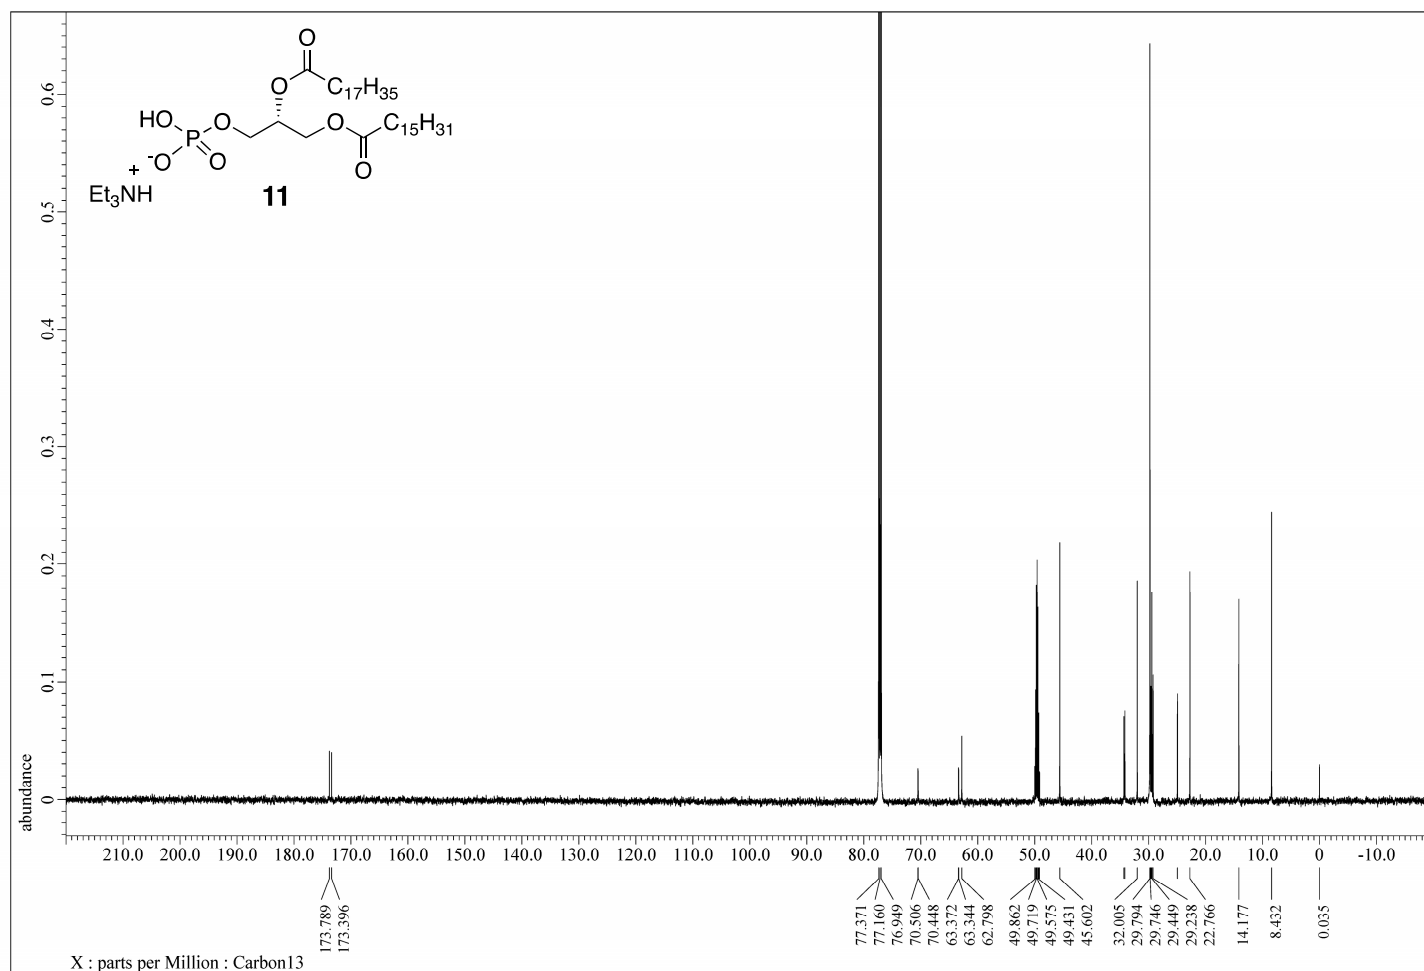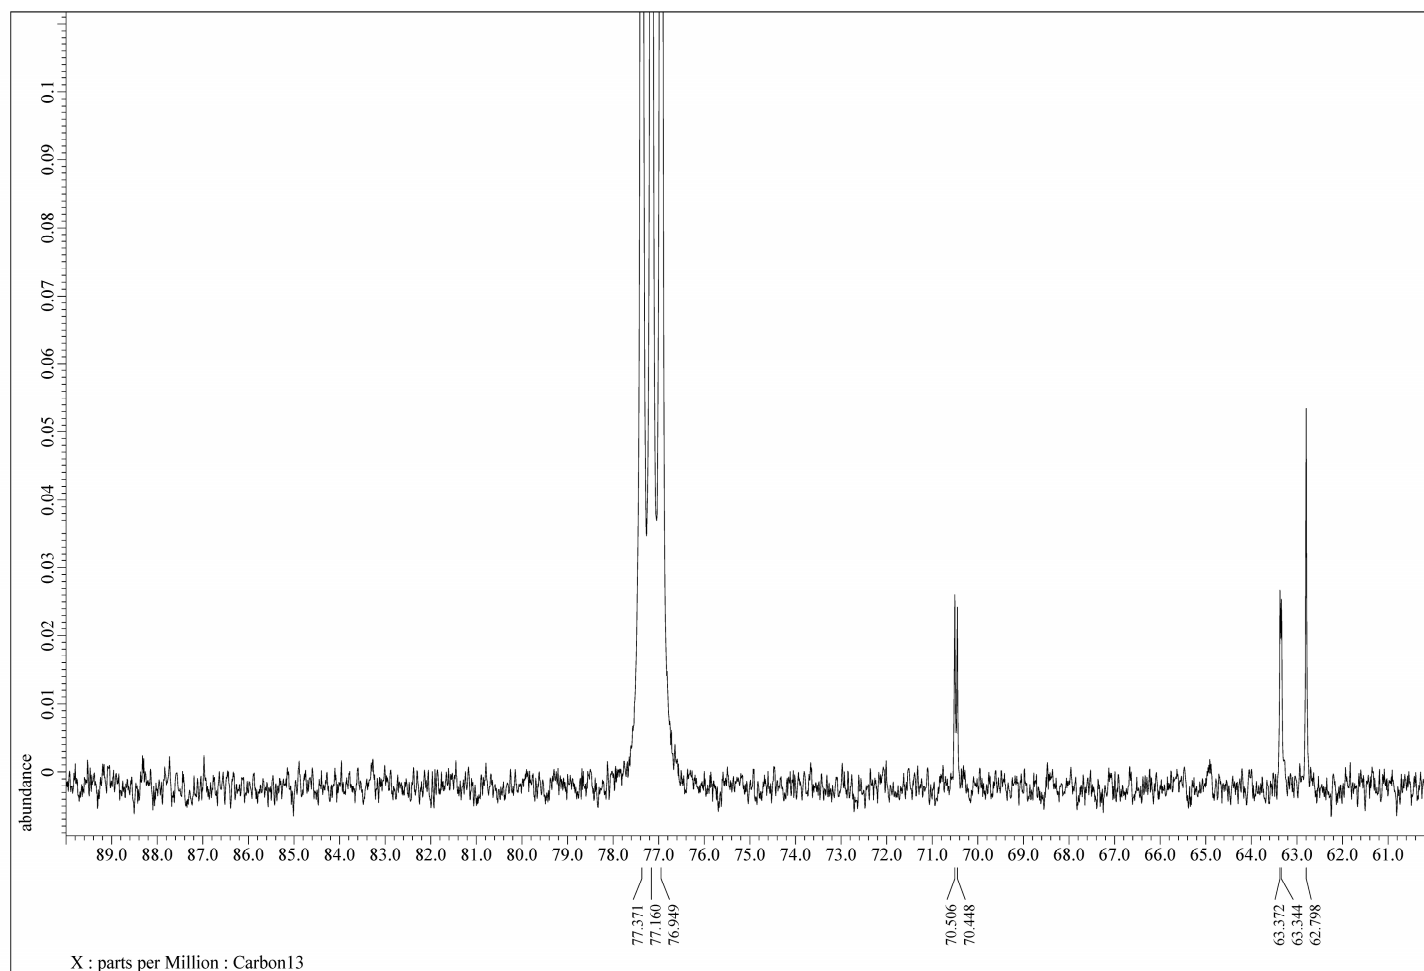

$^{31}\text{P}$ -NMR data of PA (16:0/18:0): 1-O-palmitoyl-2-O-stearoyl-*sn*-glycerol-3-phosphate triethylammonium salt (**11**), 243 MHz,  $\text{CDCl}_3$ ,  $\text{CD}_3\text{OD}$  3%

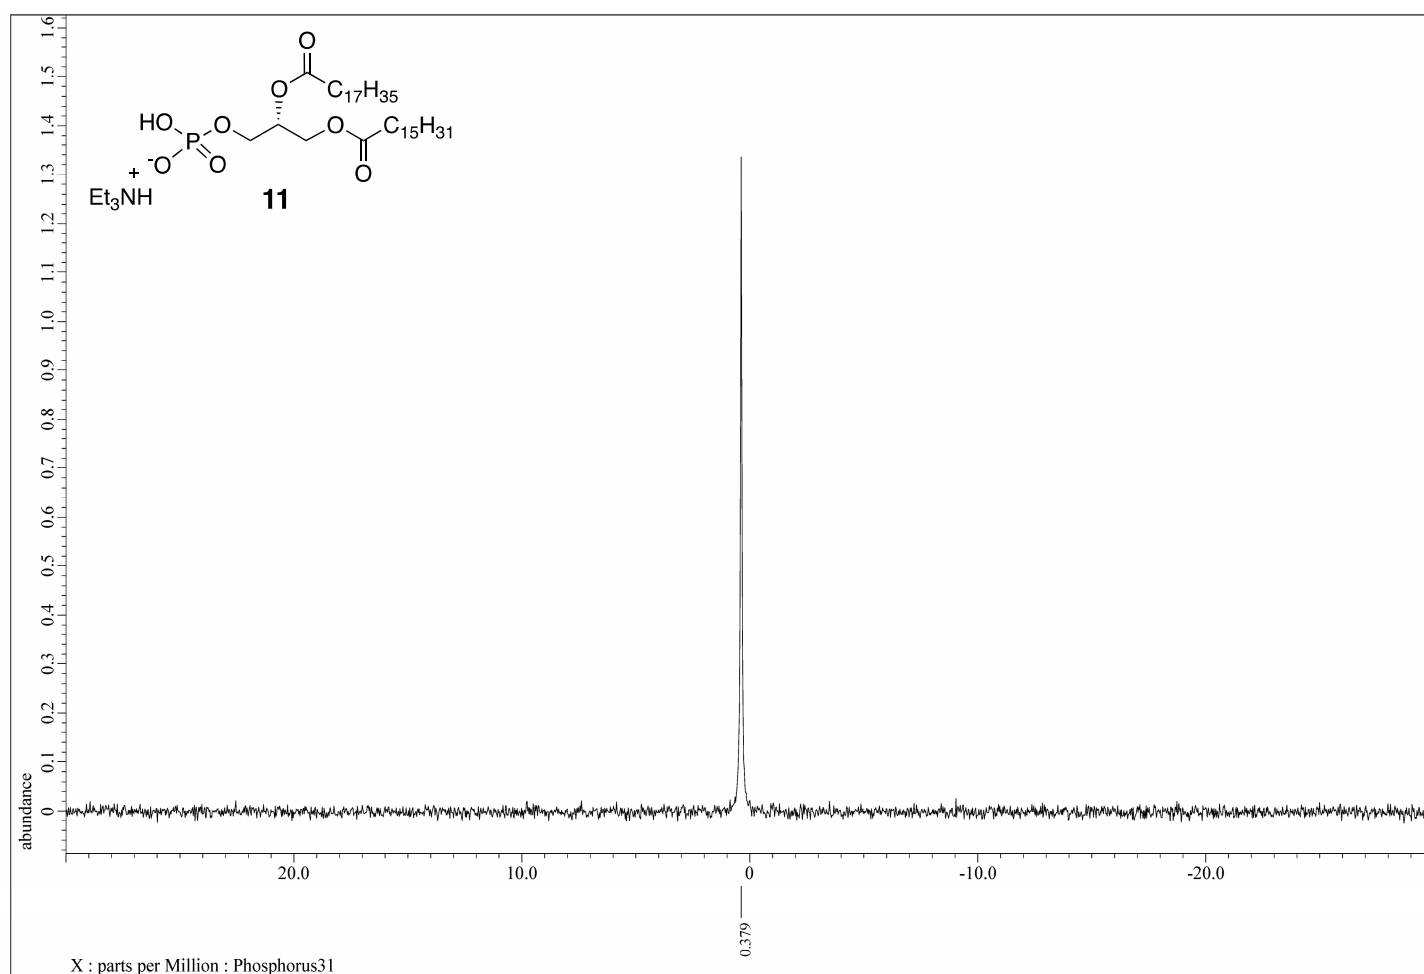



$^1\text{H}$ -NMR data of PA (16:0/16:0): 1, 2-di-O-palmitoyl-*sn*-glycerol-3-phosphate triethylammonium salt (**13**), 600 MHz,  $\text{CDCl}_3$ ,  $\text{CD}_3\text{OD}$  3%

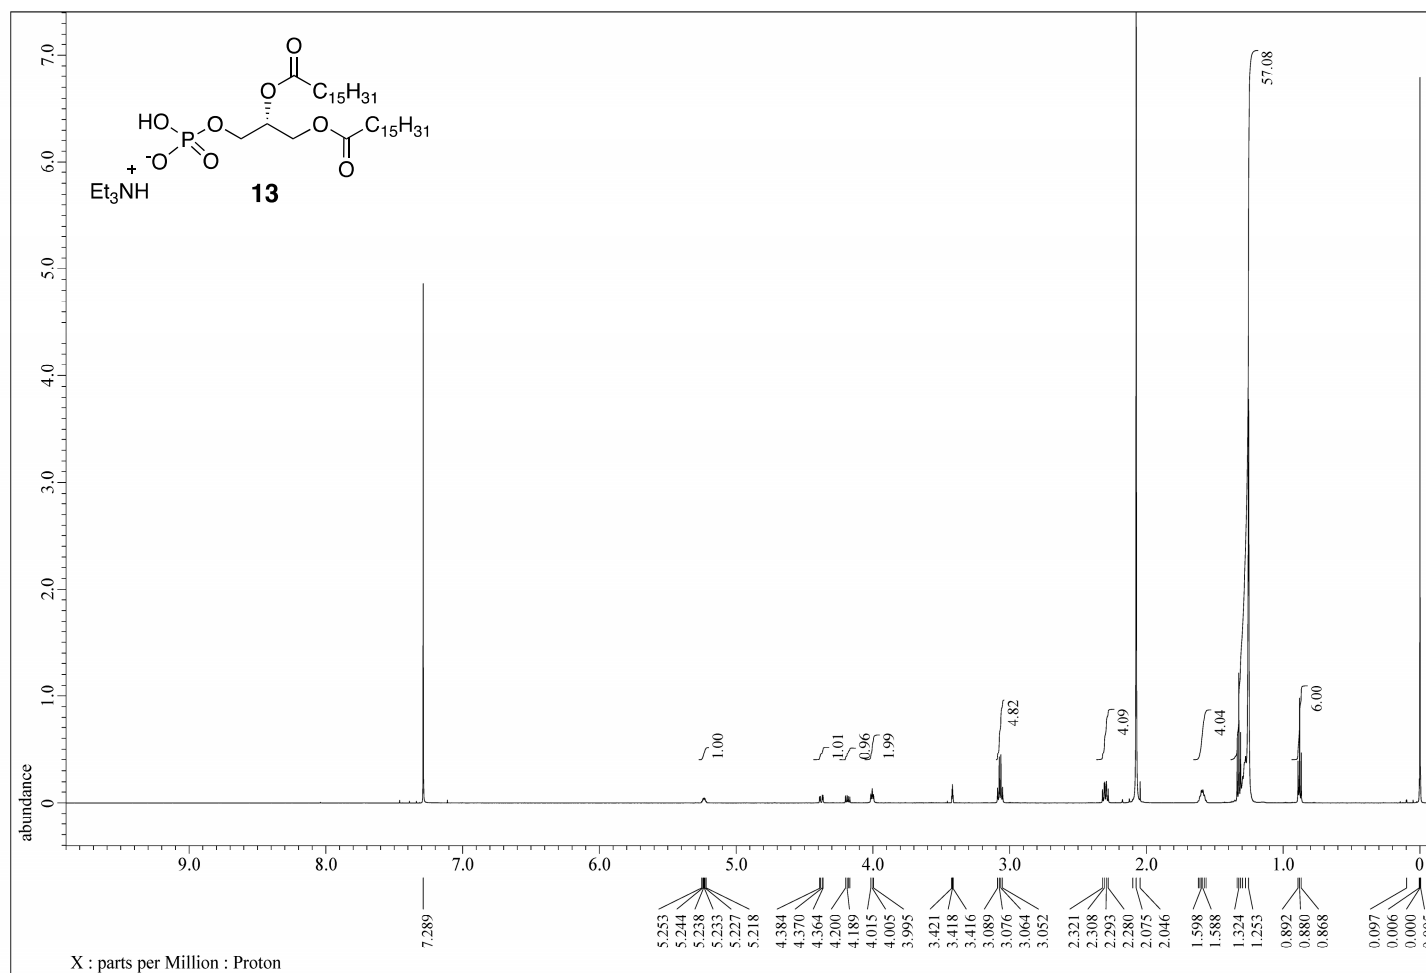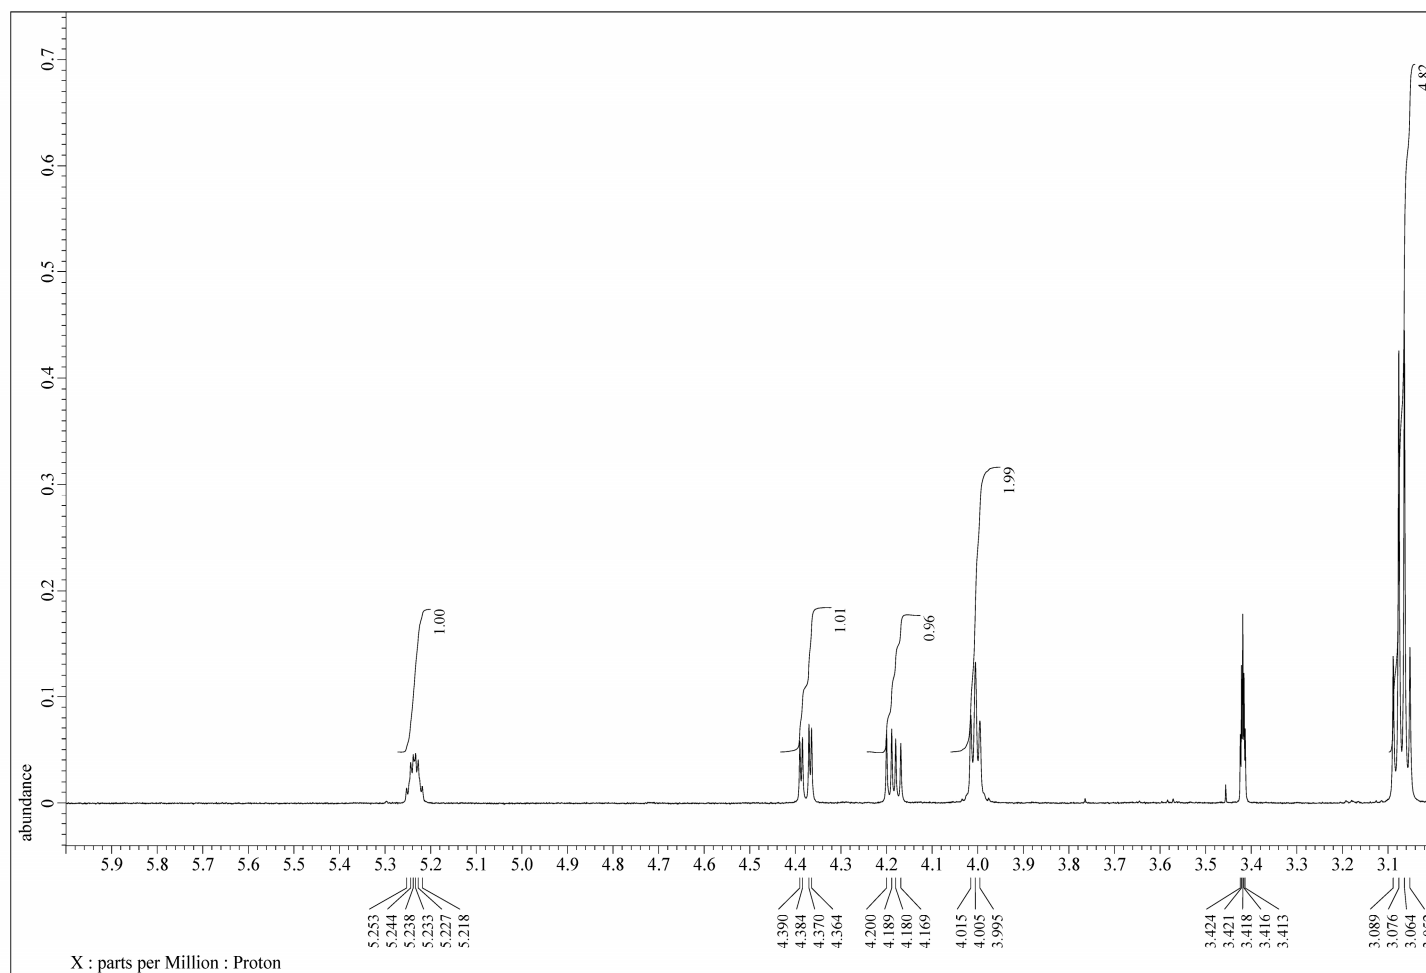

$^{13}\text{C}$ -NMR data of PA (16:0/16:0): 1, 2-di-*O*-palmitoyl-*sn*-glycerol-3-phosphate triethylammonium salt (**13**), 150 MHz,  $\text{CDCl}_3$ ,  $\text{CD}_3\text{OD}$  3%

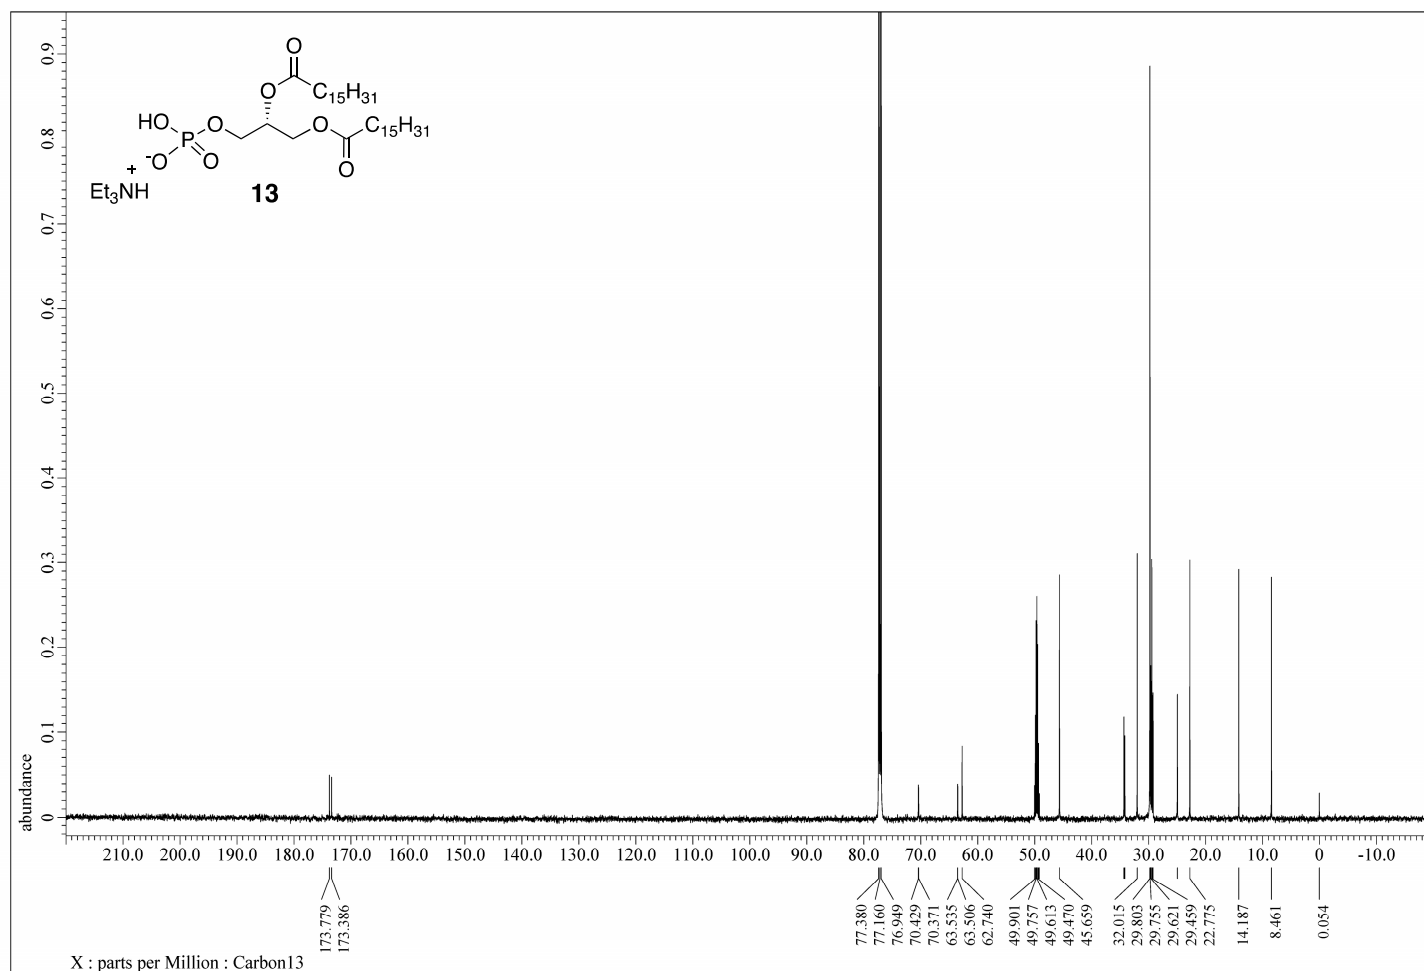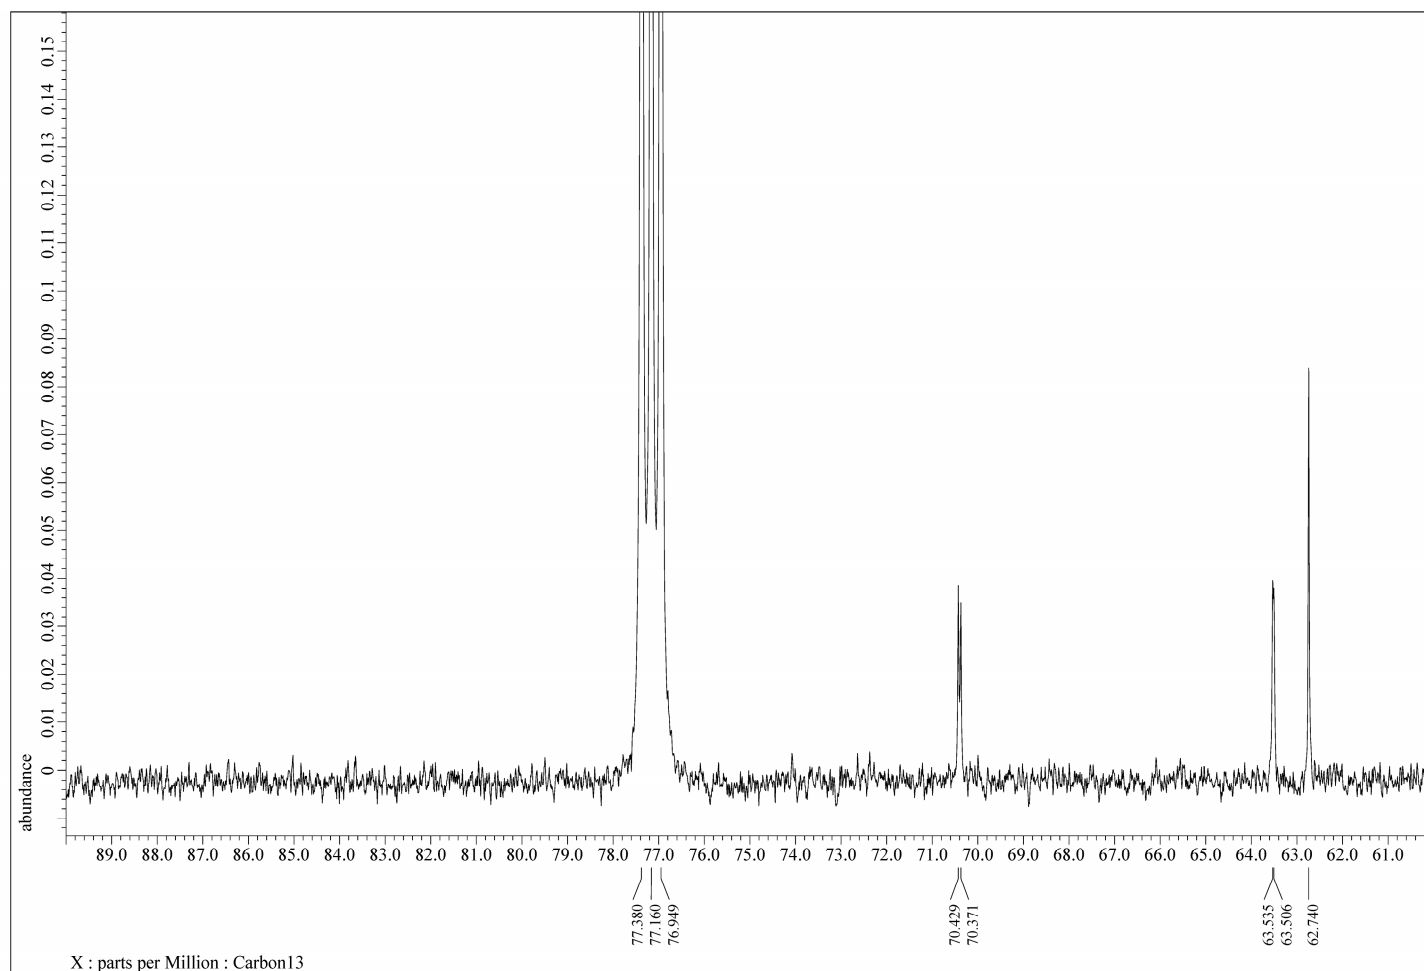

$^{31}\text{P}$ -NMR data of PA (16:0/16:0): 1, 2-di-*O*-palmitoyl-*sn*-glycerol-3-phosphate triethylammonium salt (**13**), 243 MHz,  $\text{CDCl}_3$ ,  $\text{CD}_3\text{OD}$  3%

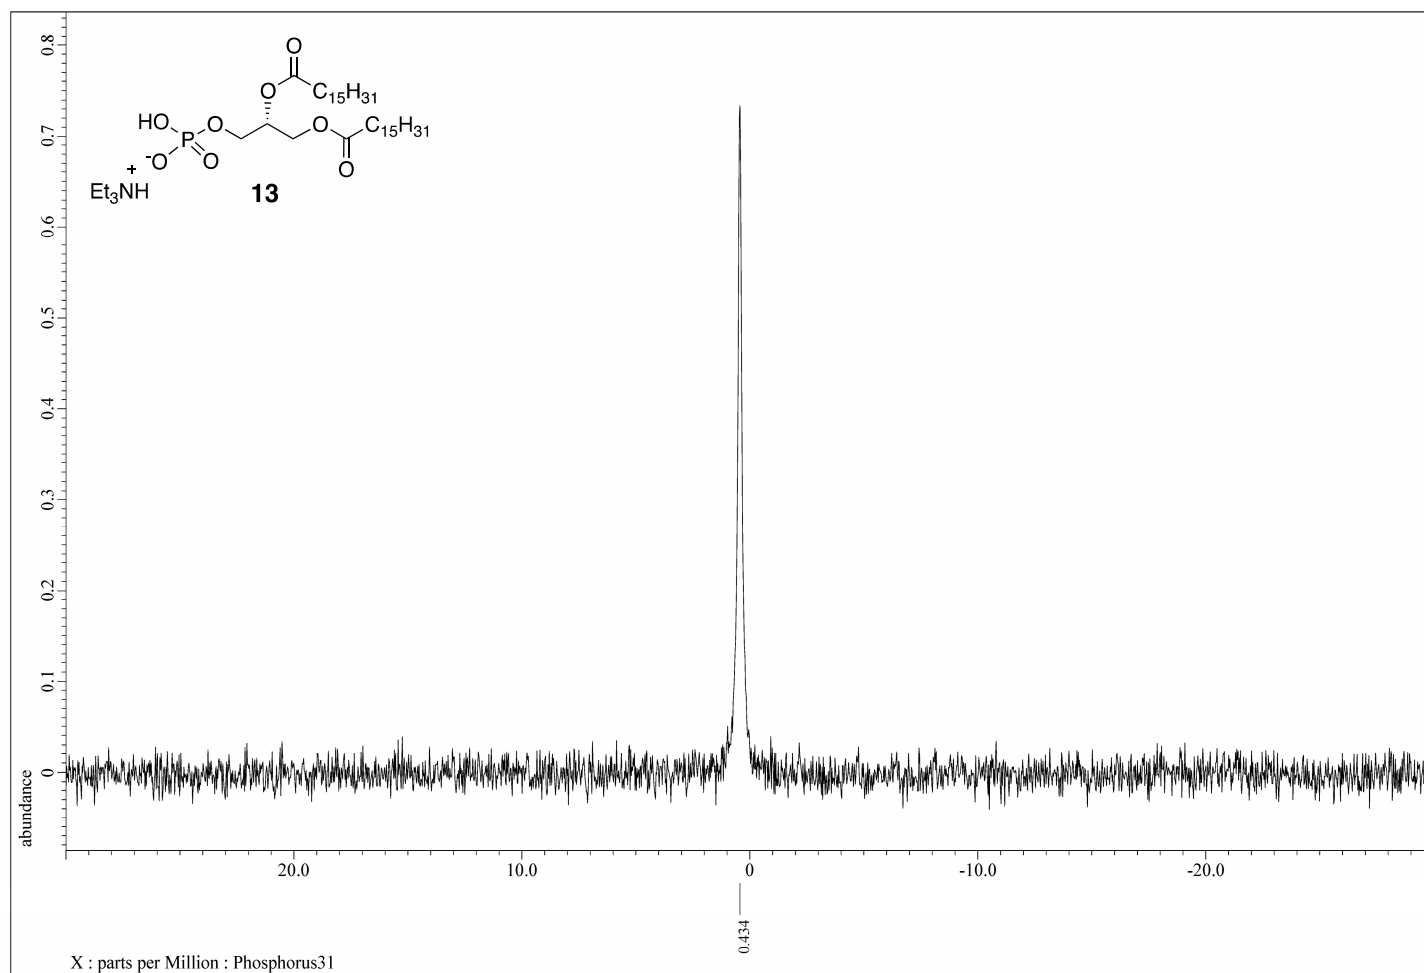

$^1\text{H}$ -NMR data of 2,2-dimethyl-1,3-dioxolan-4-ylmethyl phosphatidyl glucoside (**2**), 600 MHz,  $\text{CDCl}_3$ ,  $\text{CD}_3\text{OD}$  3%

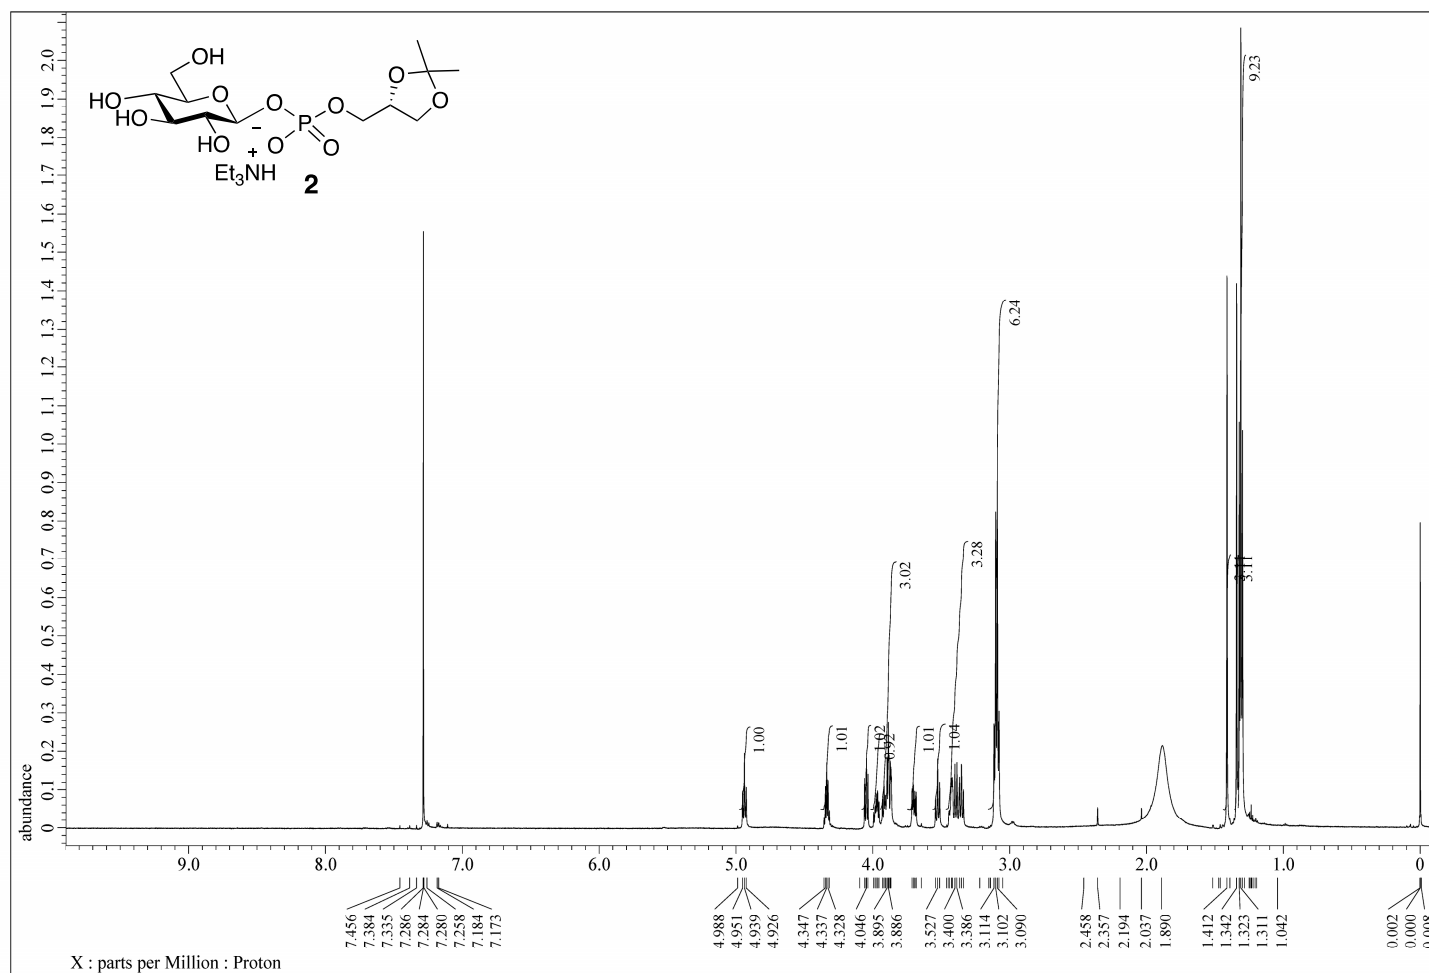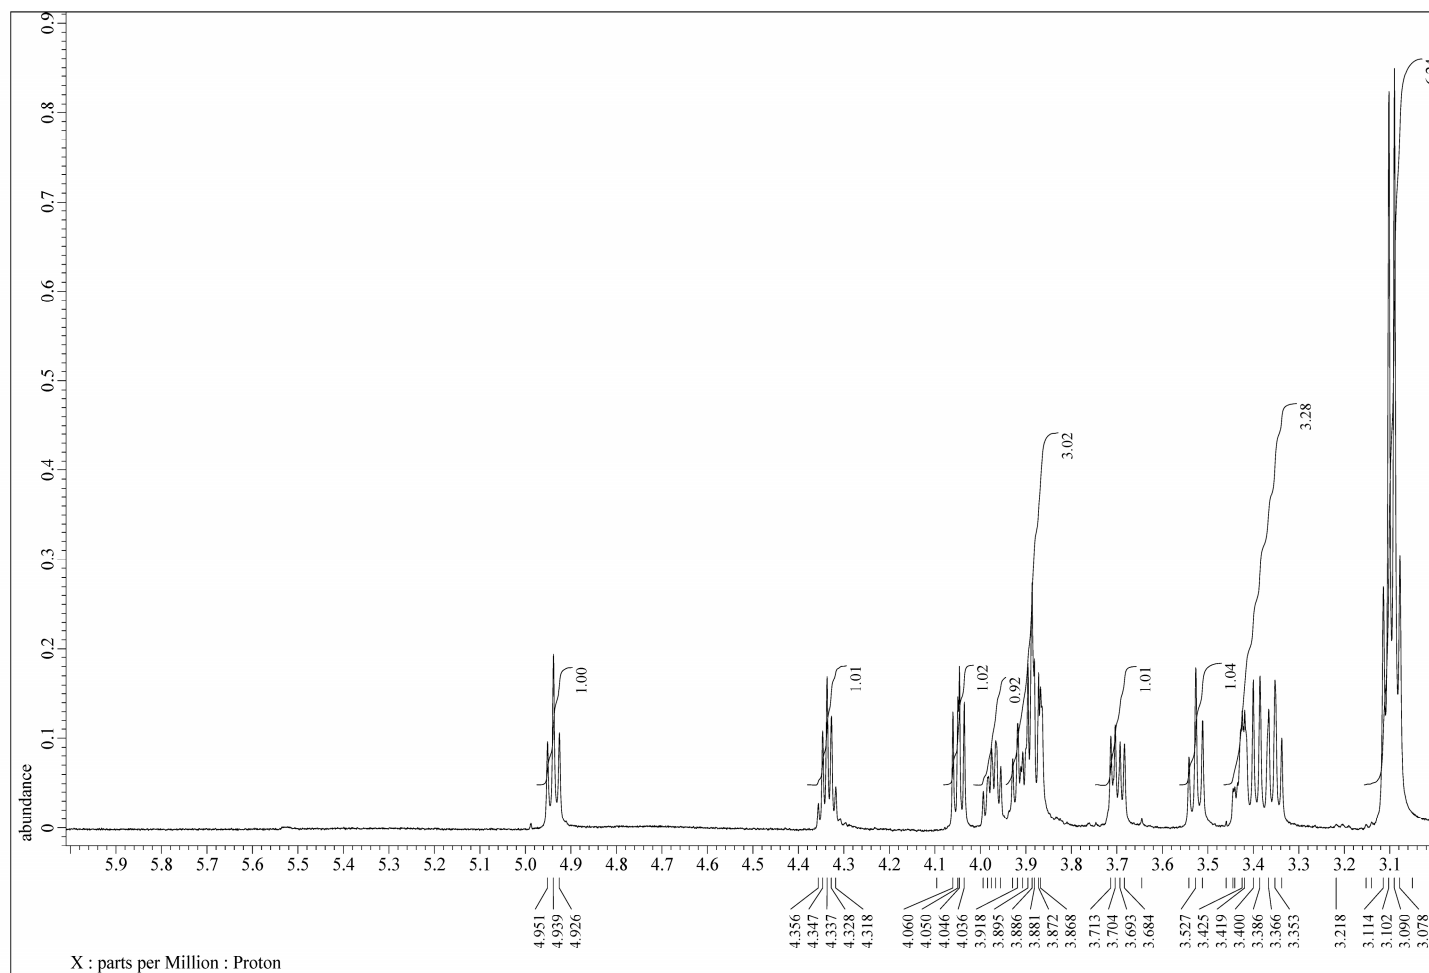

$^{13}\text{C}$ -NMR data of 2,2-dimethyl-1,3-dioxolan-4-ylmethyl phosphatidyl glucoside (**2**), 150 MHz,  $\text{CDCl}_3$ ,  $\text{CD}_3\text{OD}$  3%

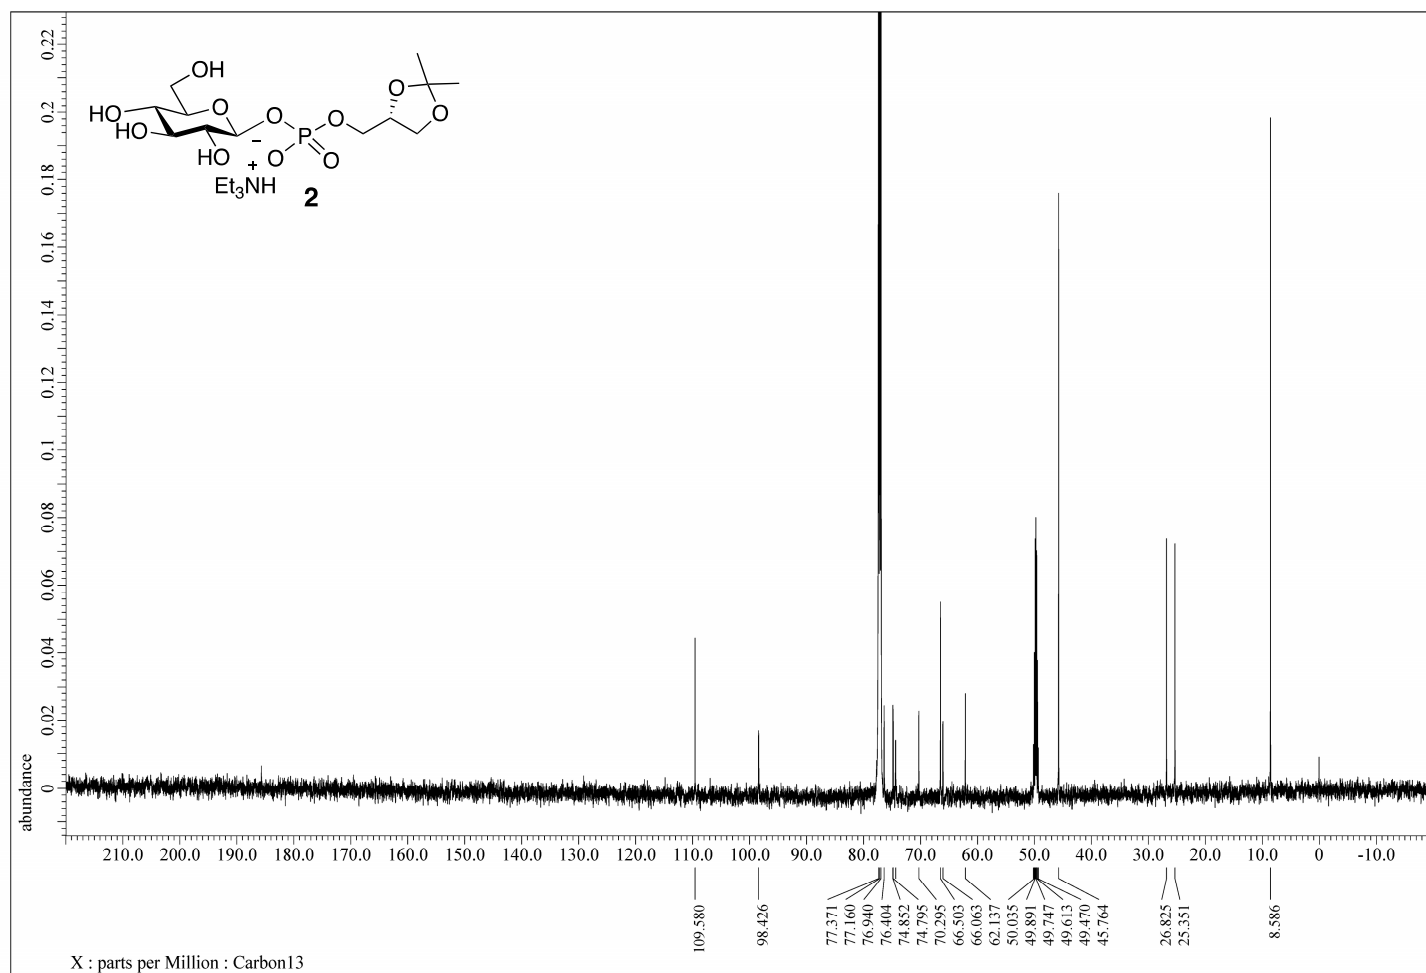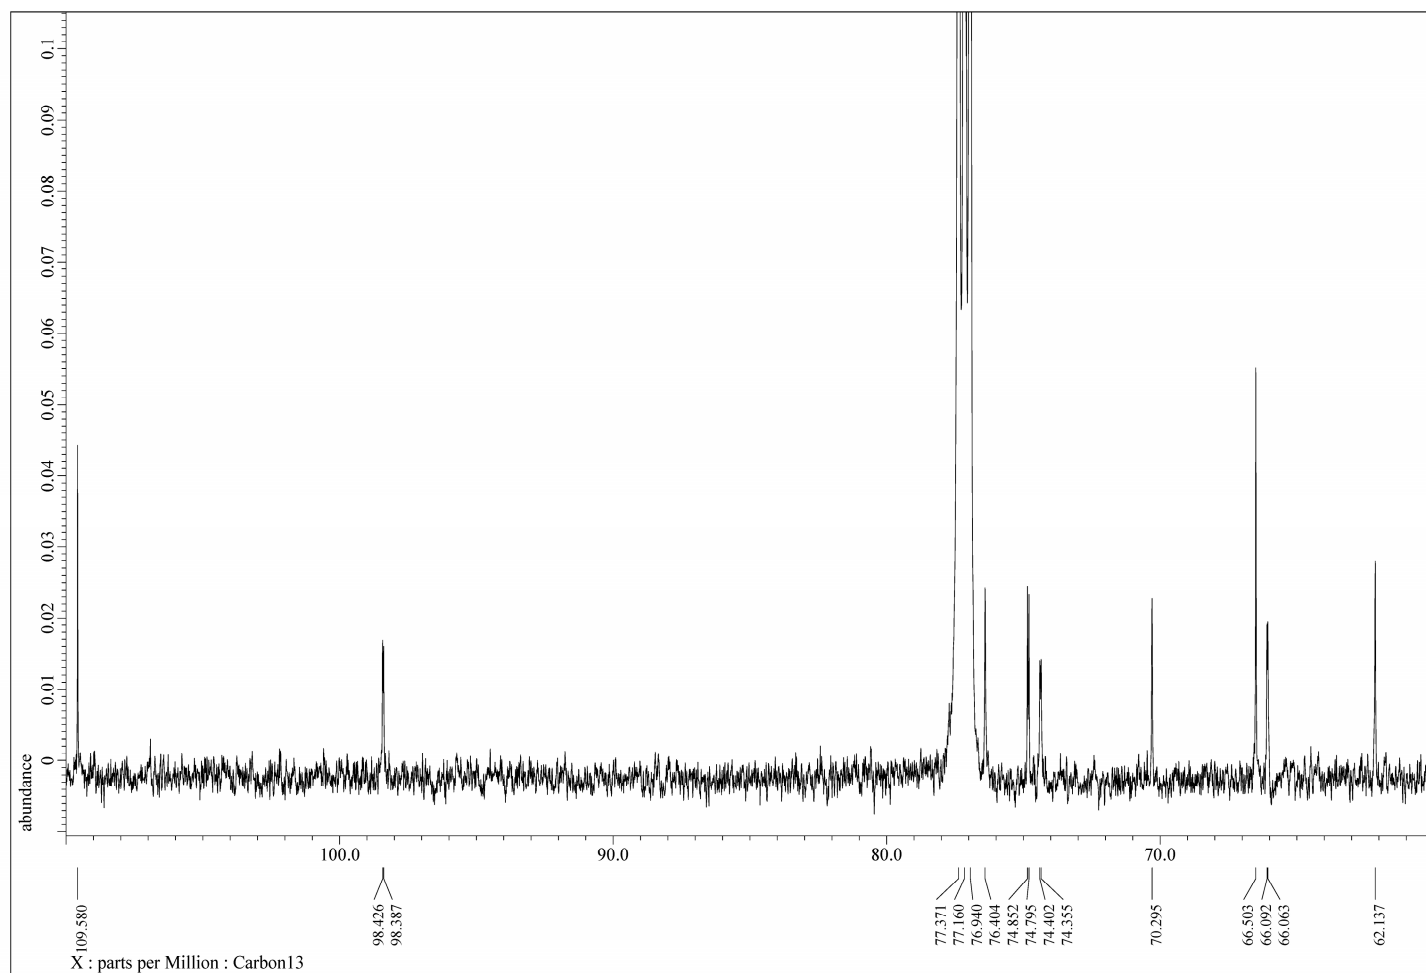

$^{31}\text{P}$ -NMR data of 2,2-dimethyl-1,3-dioxolan-4-ylmethyl phosphatidyl glucoside (**2**), 243 MHz,  $\text{CDCl}_3$ ,  $\text{CD}_3\text{OD}$  3%

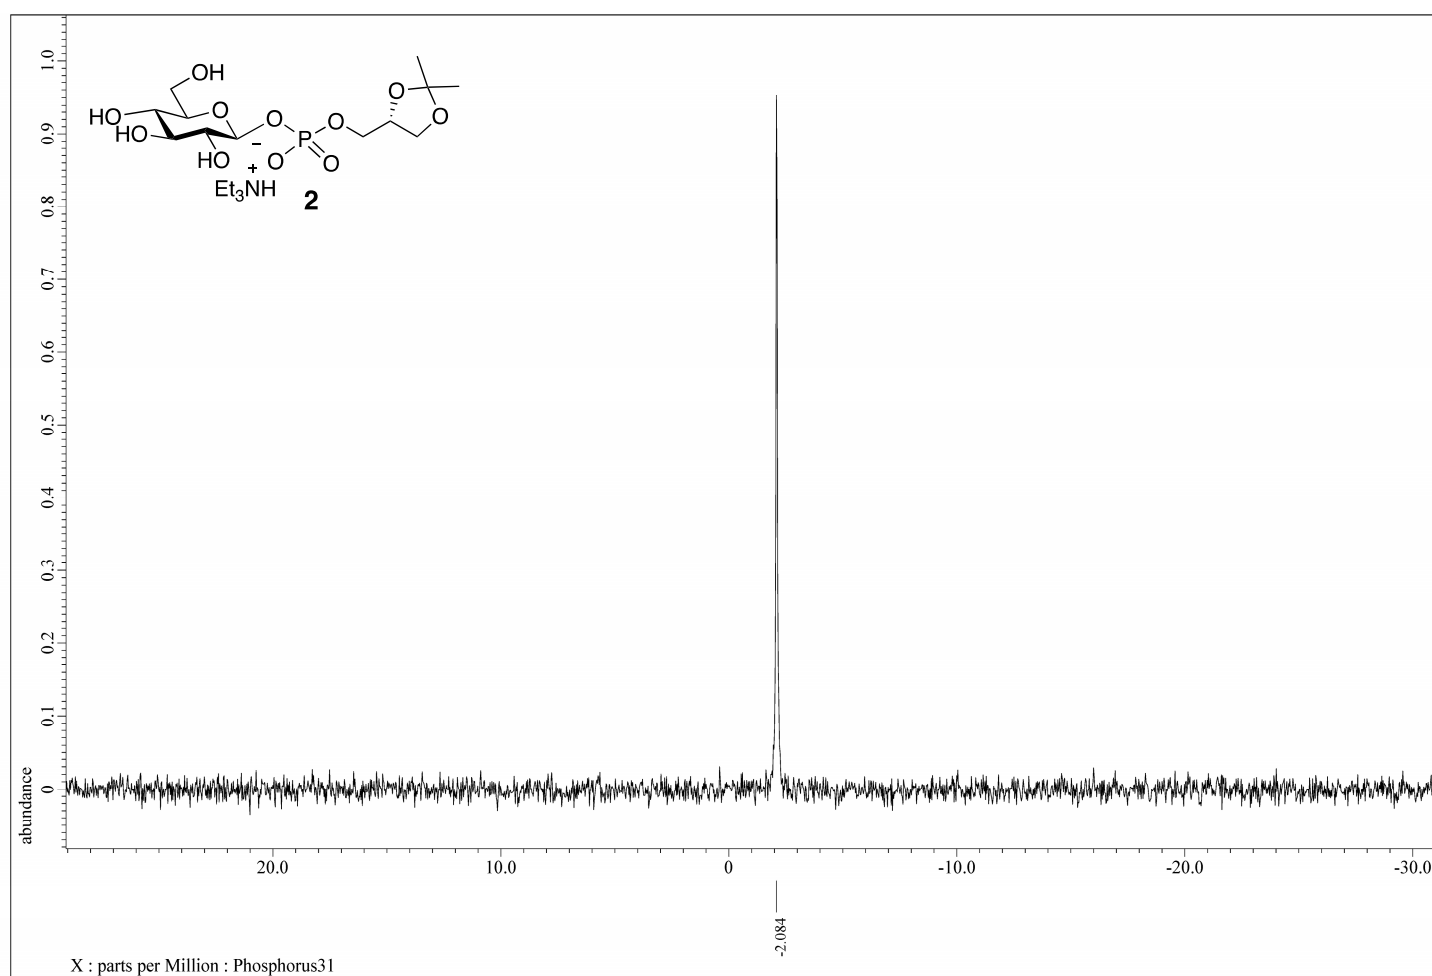

$^1\text{H}$ -NMR data of phosphatidyl glucoside (PtdGlc) (18:0/20:0) (**4**), 600 MHz,  $\text{CDCl}_3/\text{CD}_3\text{OD} = 2/1$

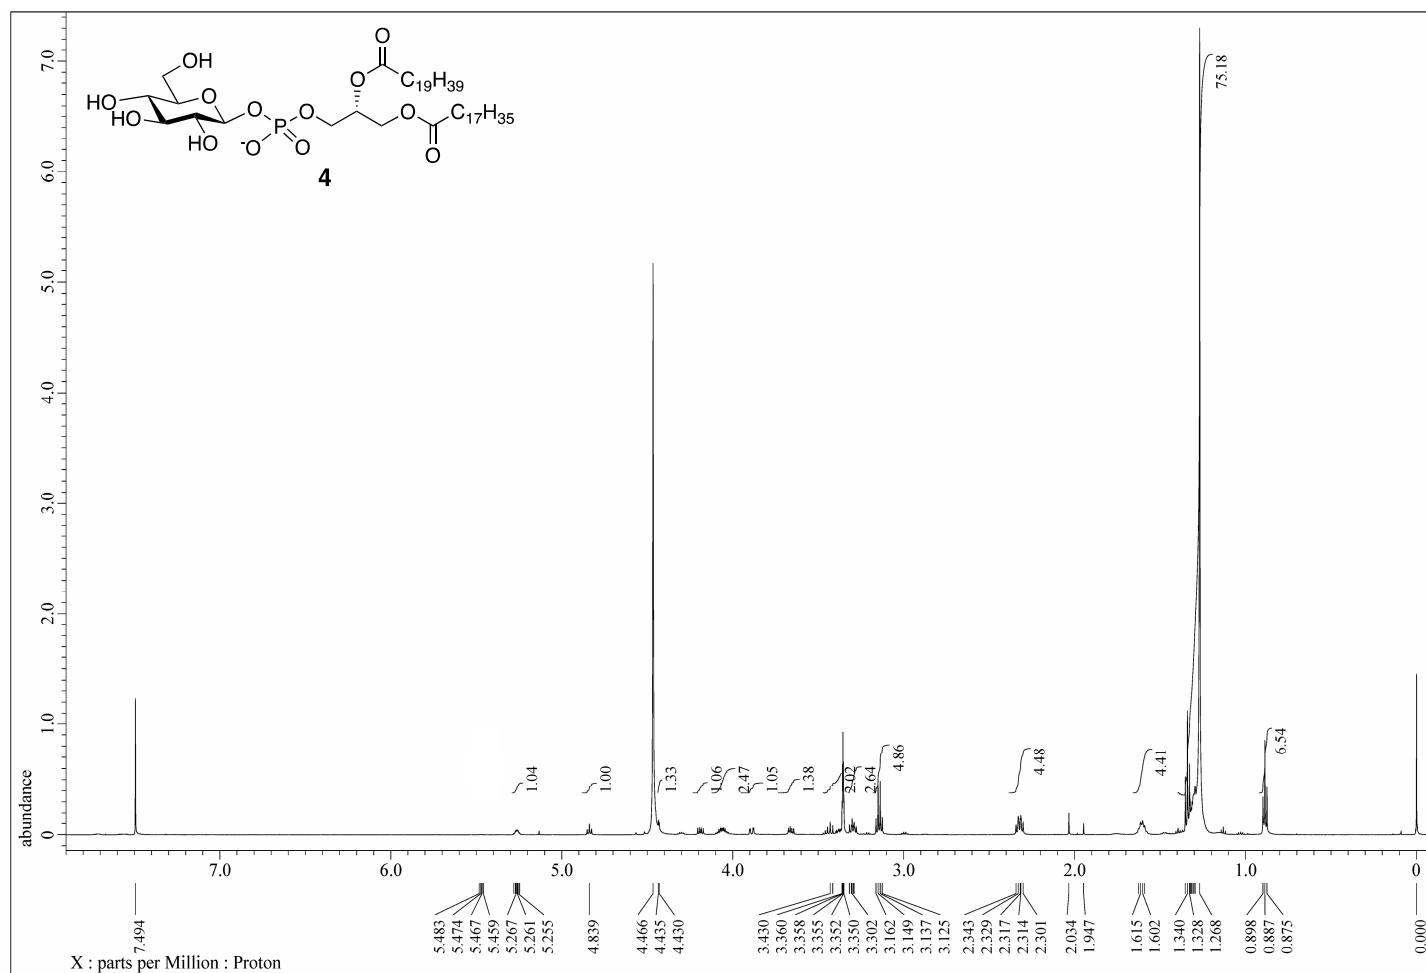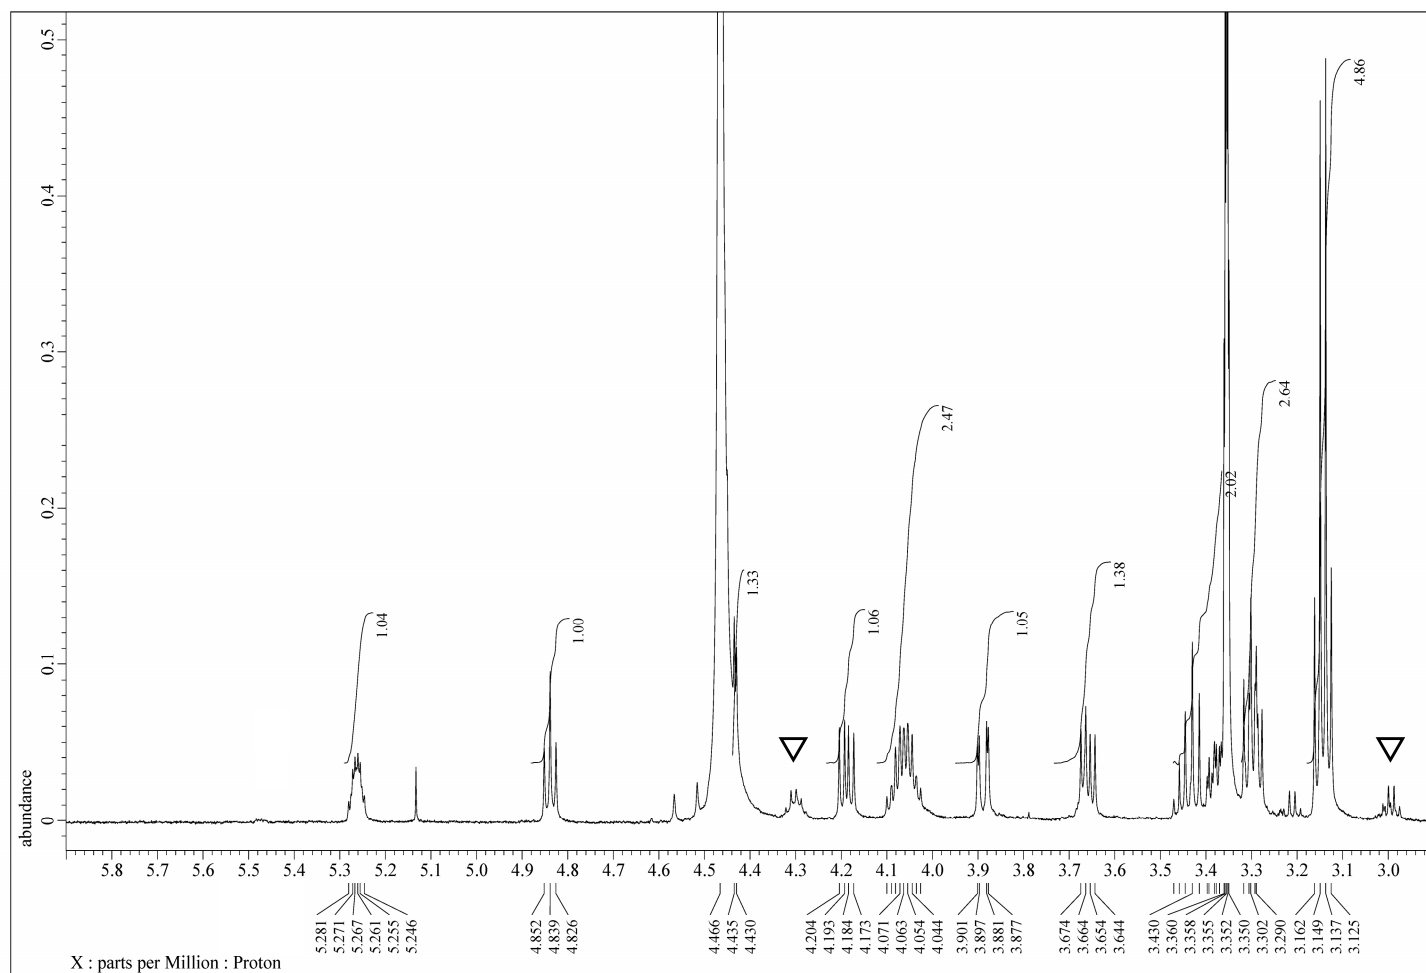

$^{13}\text{C}$ -NMR data phosphatidyl glucoside (PtdGlc) (18:0/20:0) (**4**), 150 MHz,  $\text{CDCl}_3/\text{CD}_3\text{OD} = 2/1$

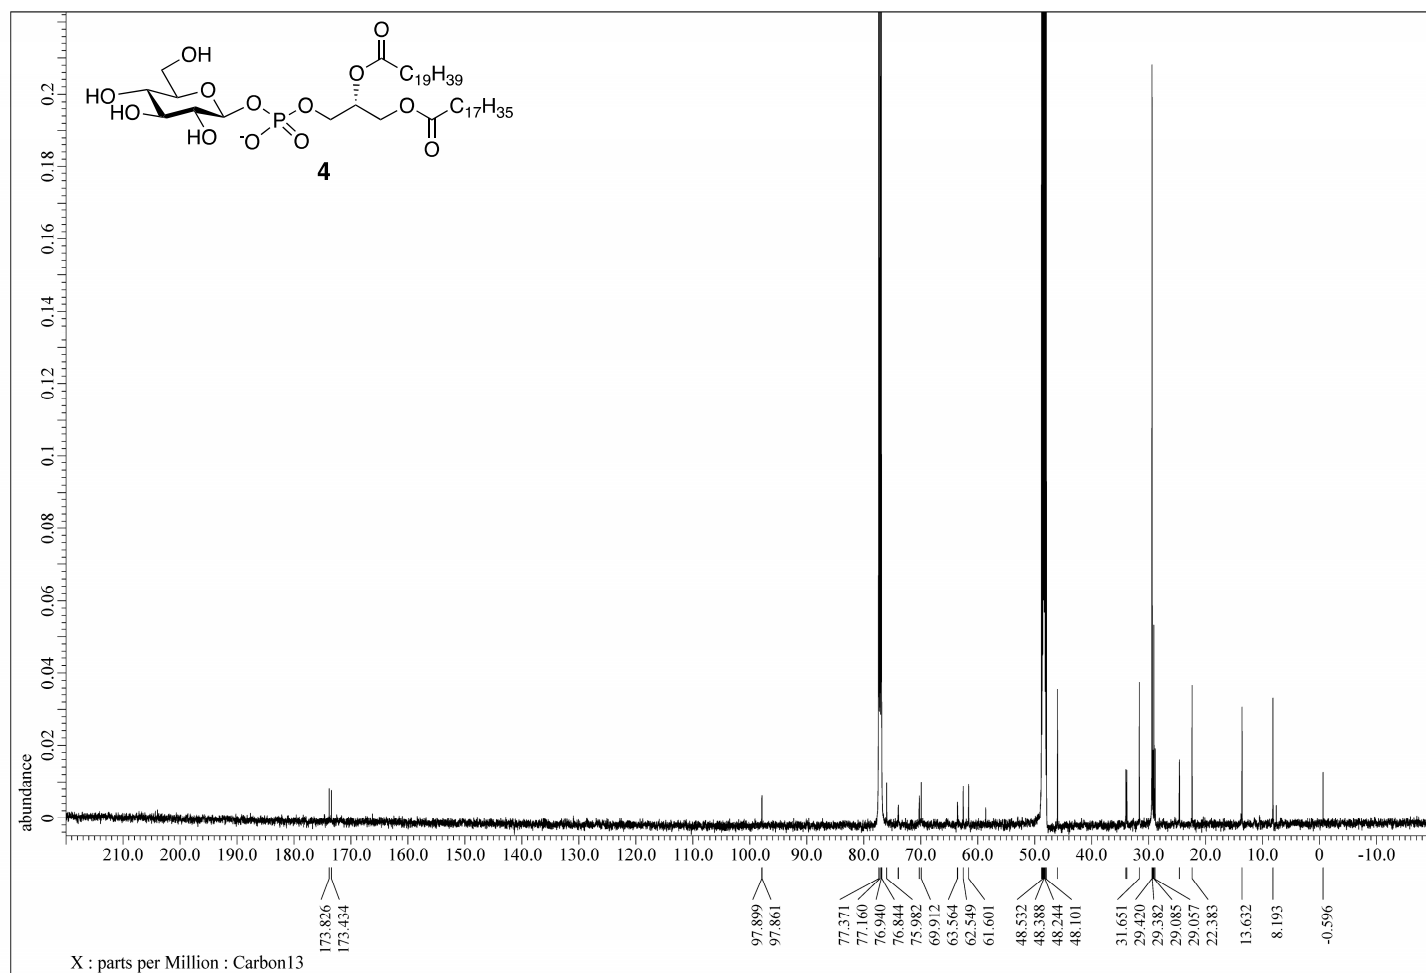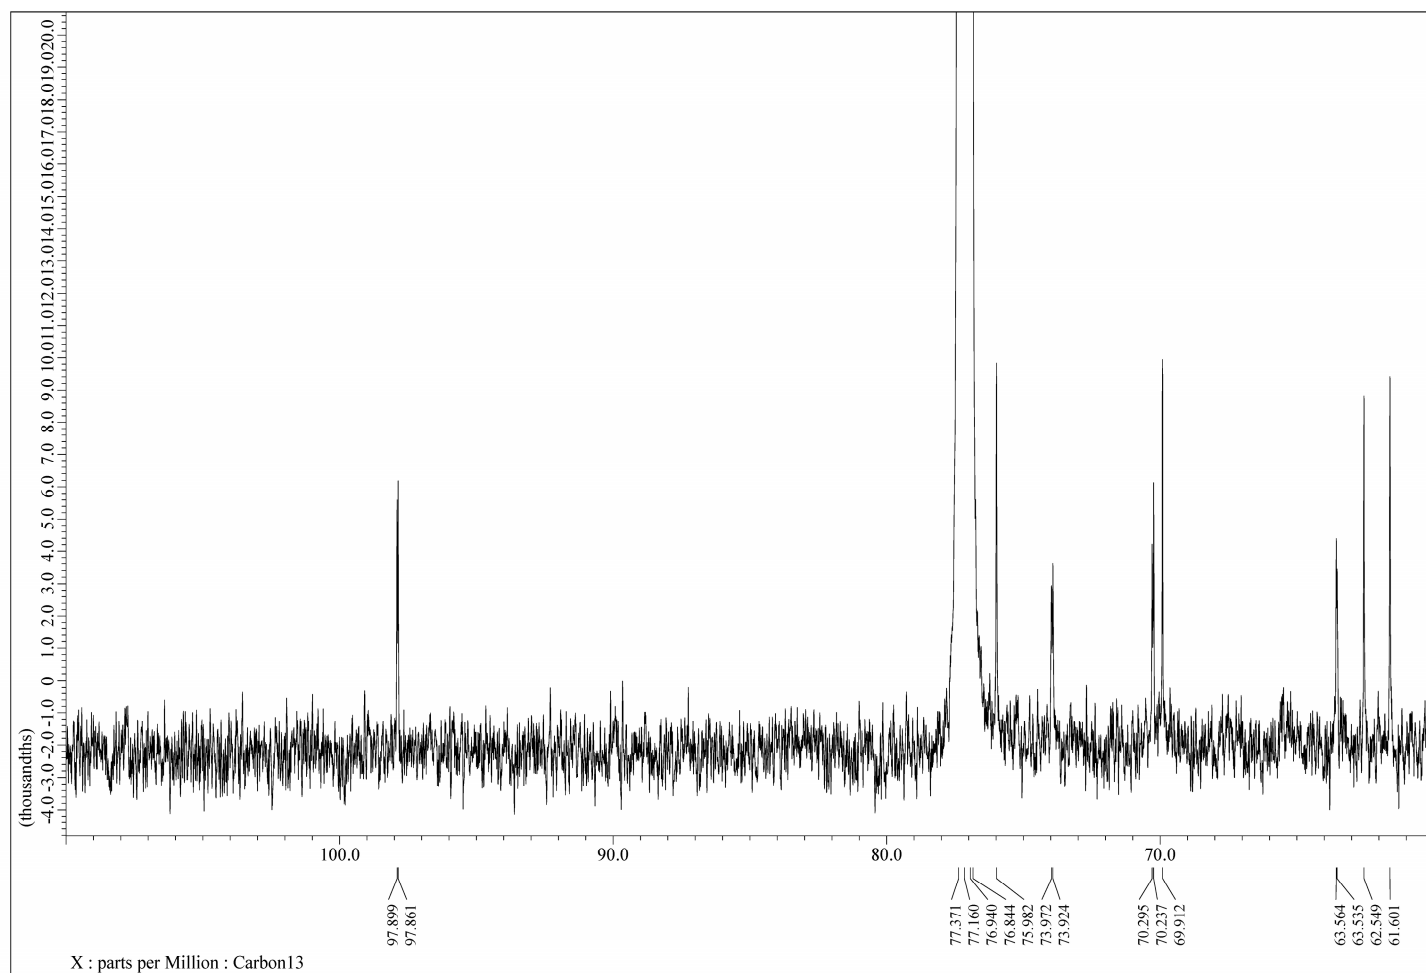



$^{31}\text{P}$ -NMR data of phosphatidyl glucoside (PtdGlc) (18:0/20:0) (**4**), 243 MHz,  $\text{CDCl}_3/\text{CD}_3\text{OD} = 2/1$

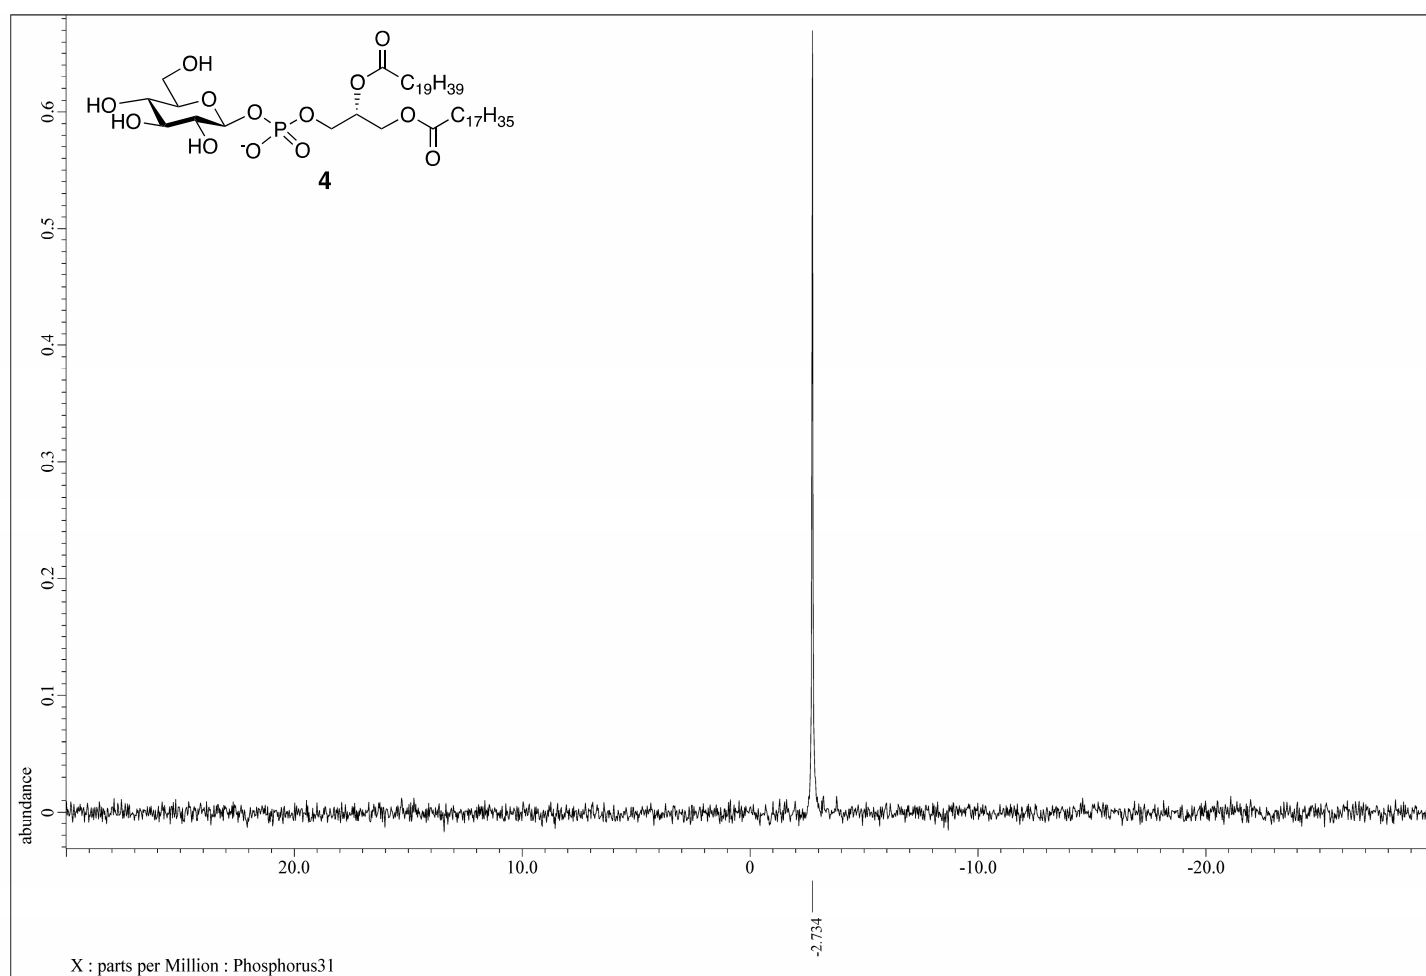

<sup>1</sup>H-NMR data of PtdGlc (18:0/18:0) (**6**), 600 MHz, CDCl<sub>3</sub>/CD<sub>3</sub>OD = 2/1

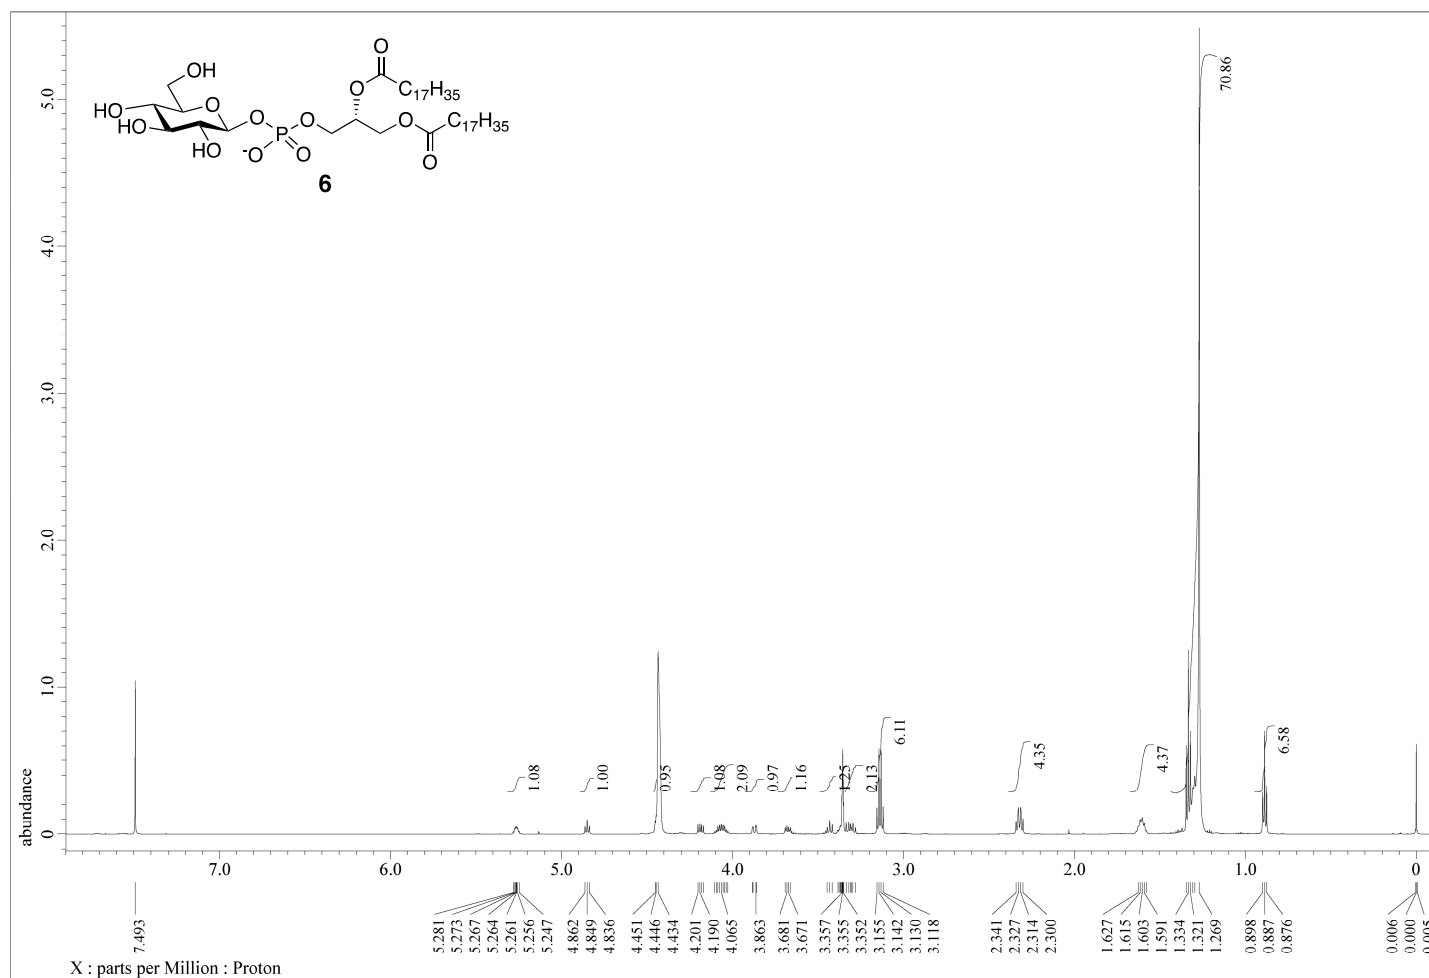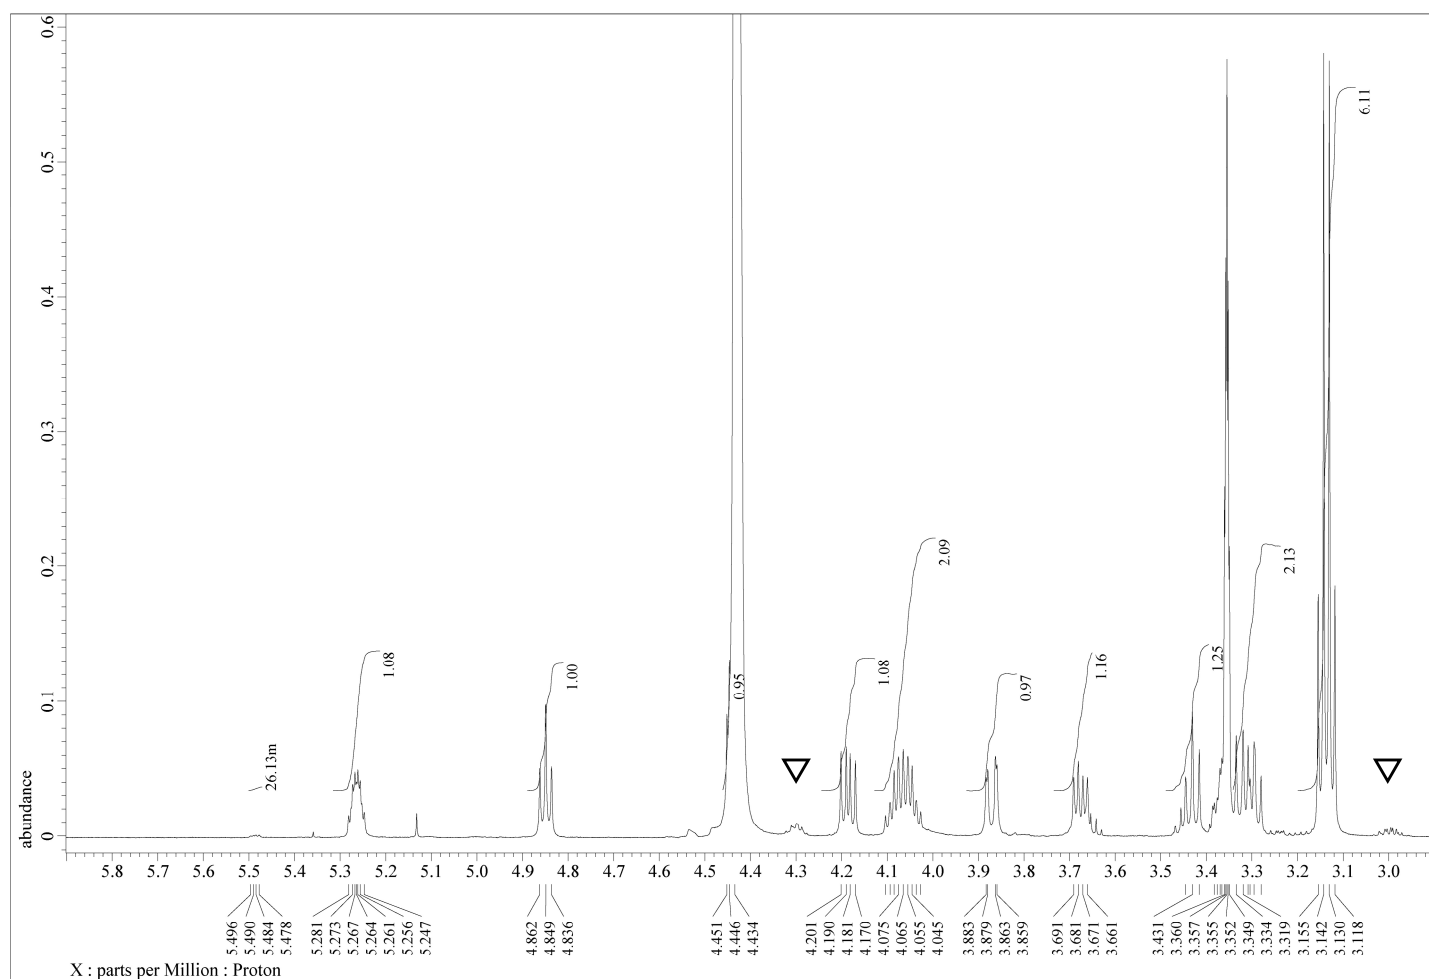

$^{13}\text{C}$ -NMR data of PtdGlc (18:0/18:0) (**6**), 150 MHz,  $\text{CDCl}_3/\text{CD}_3\text{OD} = 2/1$

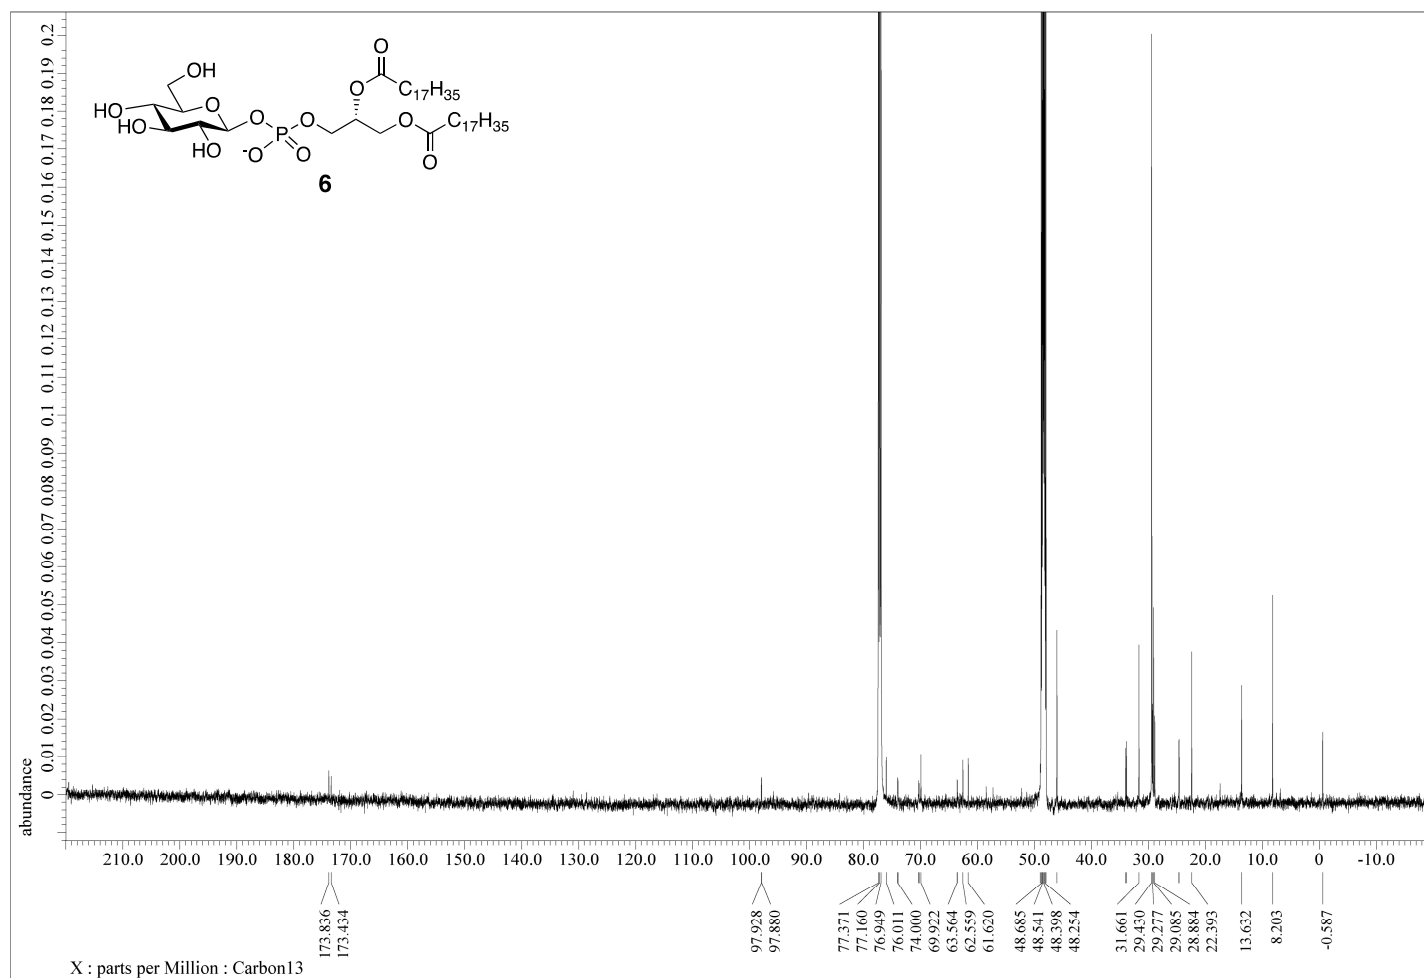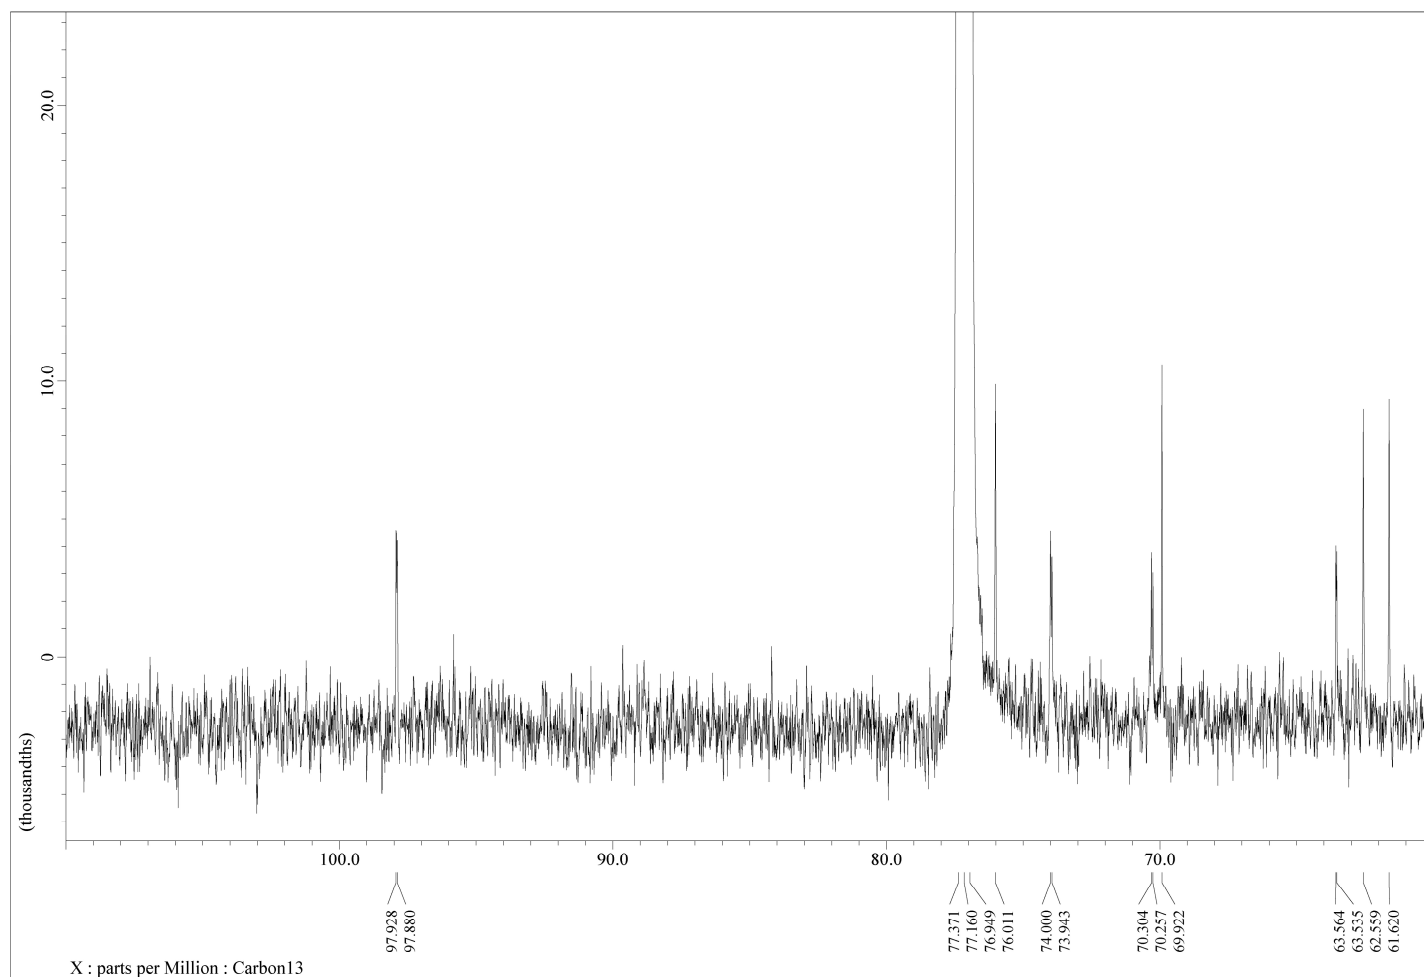

$^{31}\text{P}$ -NMR data of PtdGlc (18:0/18:0) (**6**), 150 MHz,  $\text{CDCl}_3/\text{CD}_3\text{OD} = 2/1$

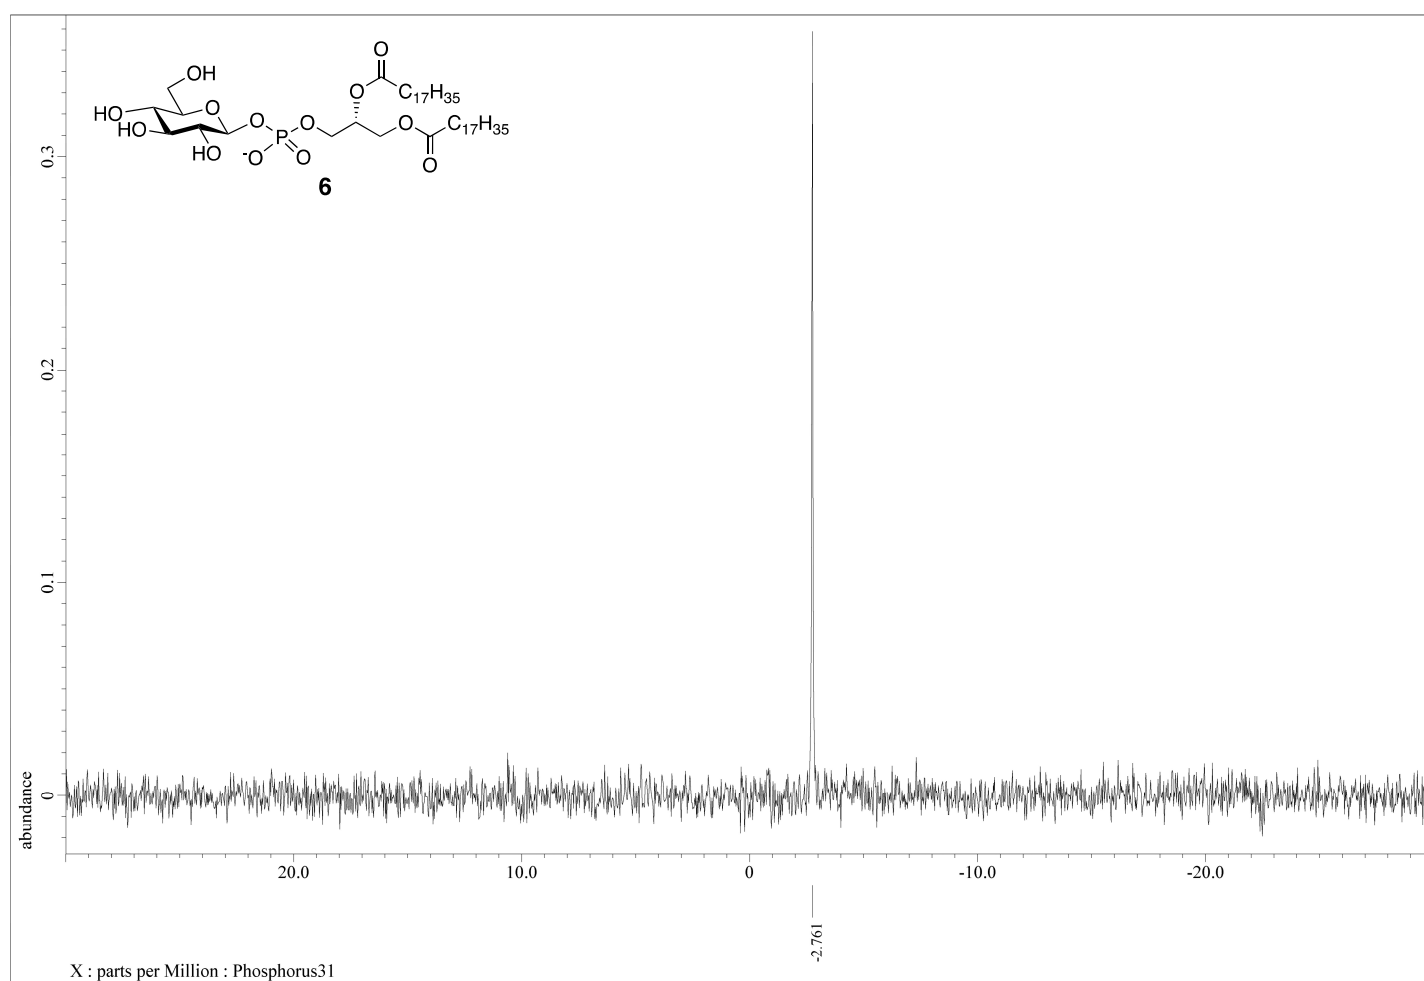

$^1\text{H}$ -NMR data of PtdGlc (18:1/18:1) (**8**), 600 MHz,  $\text{CDCl}_3/\text{CD}_3\text{OD} = 2/1$

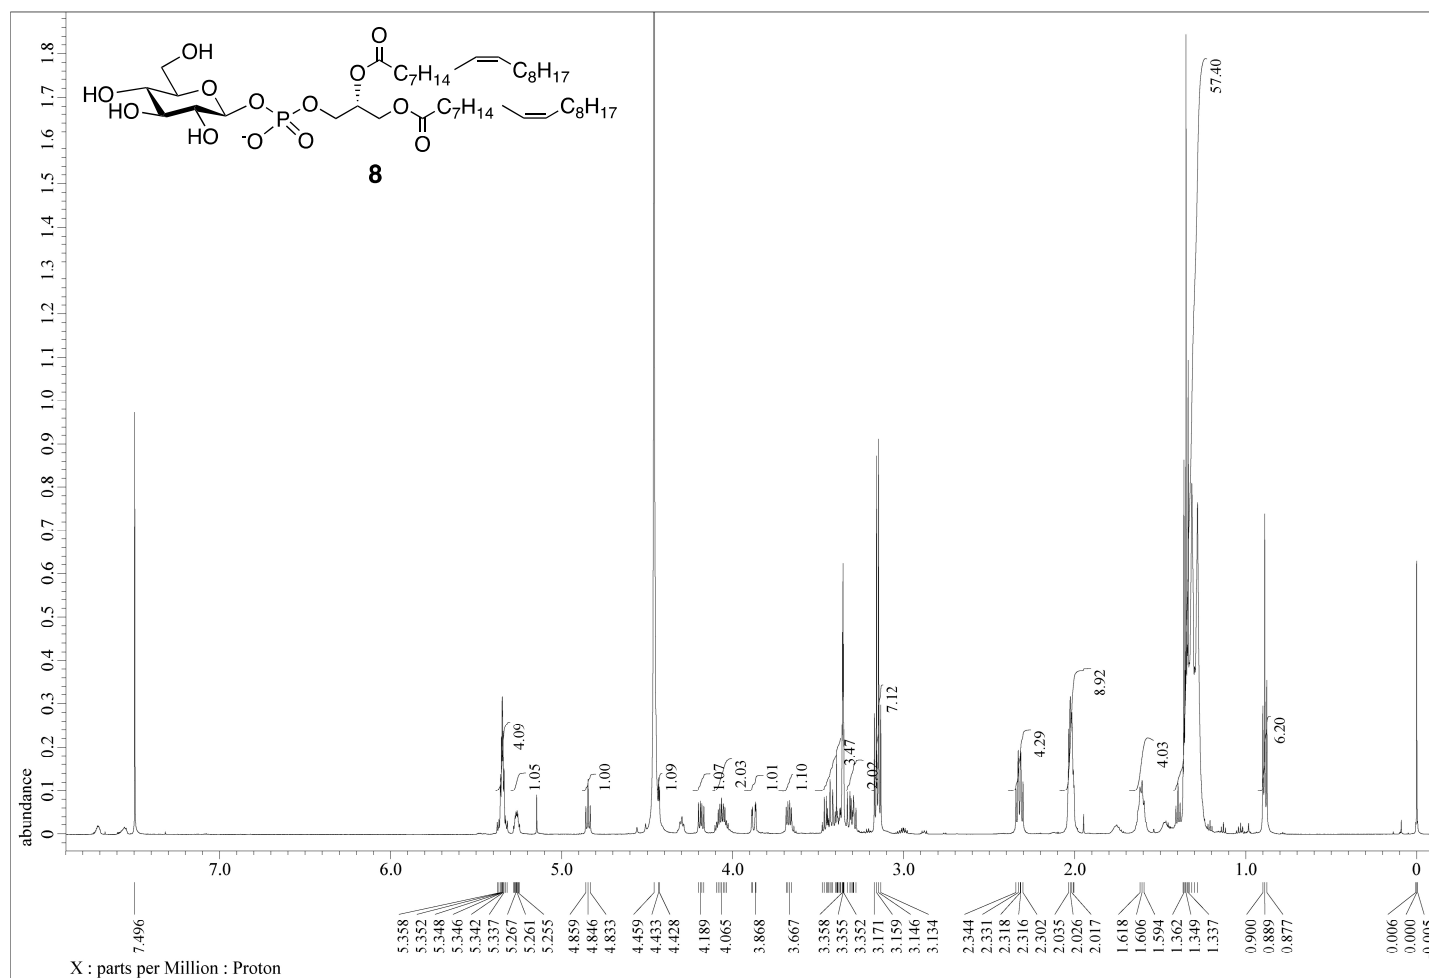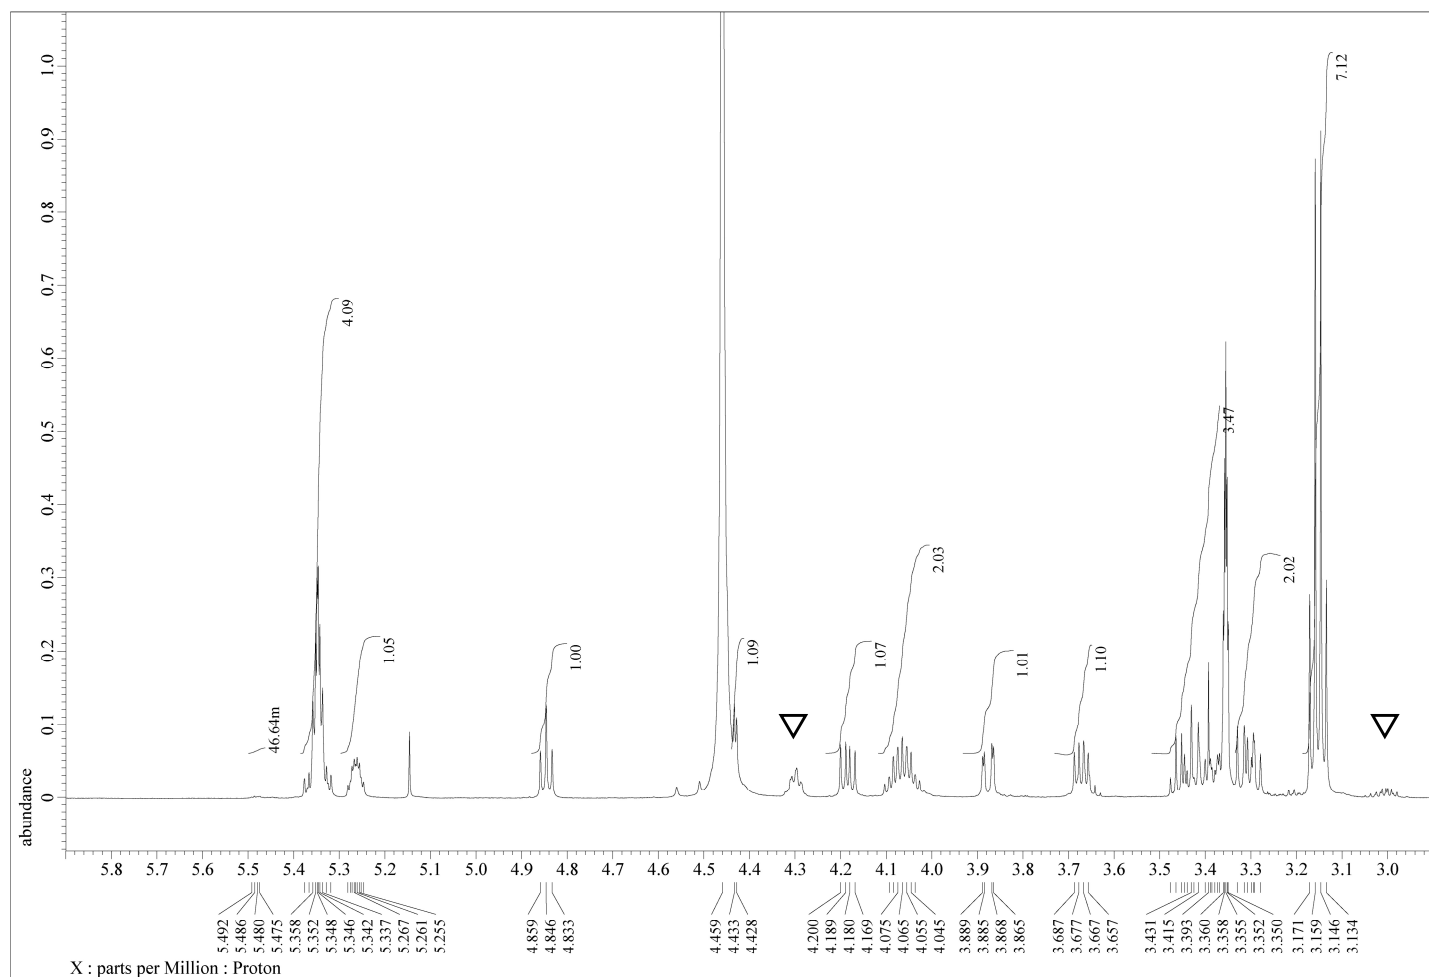

$^{13}\text{C}$ -NMR data of PtdGlc (18:1/18:1) (**8**), 150 MHz,  $\text{CDCl}_3/\text{CD}_3\text{OD} = 2/1$

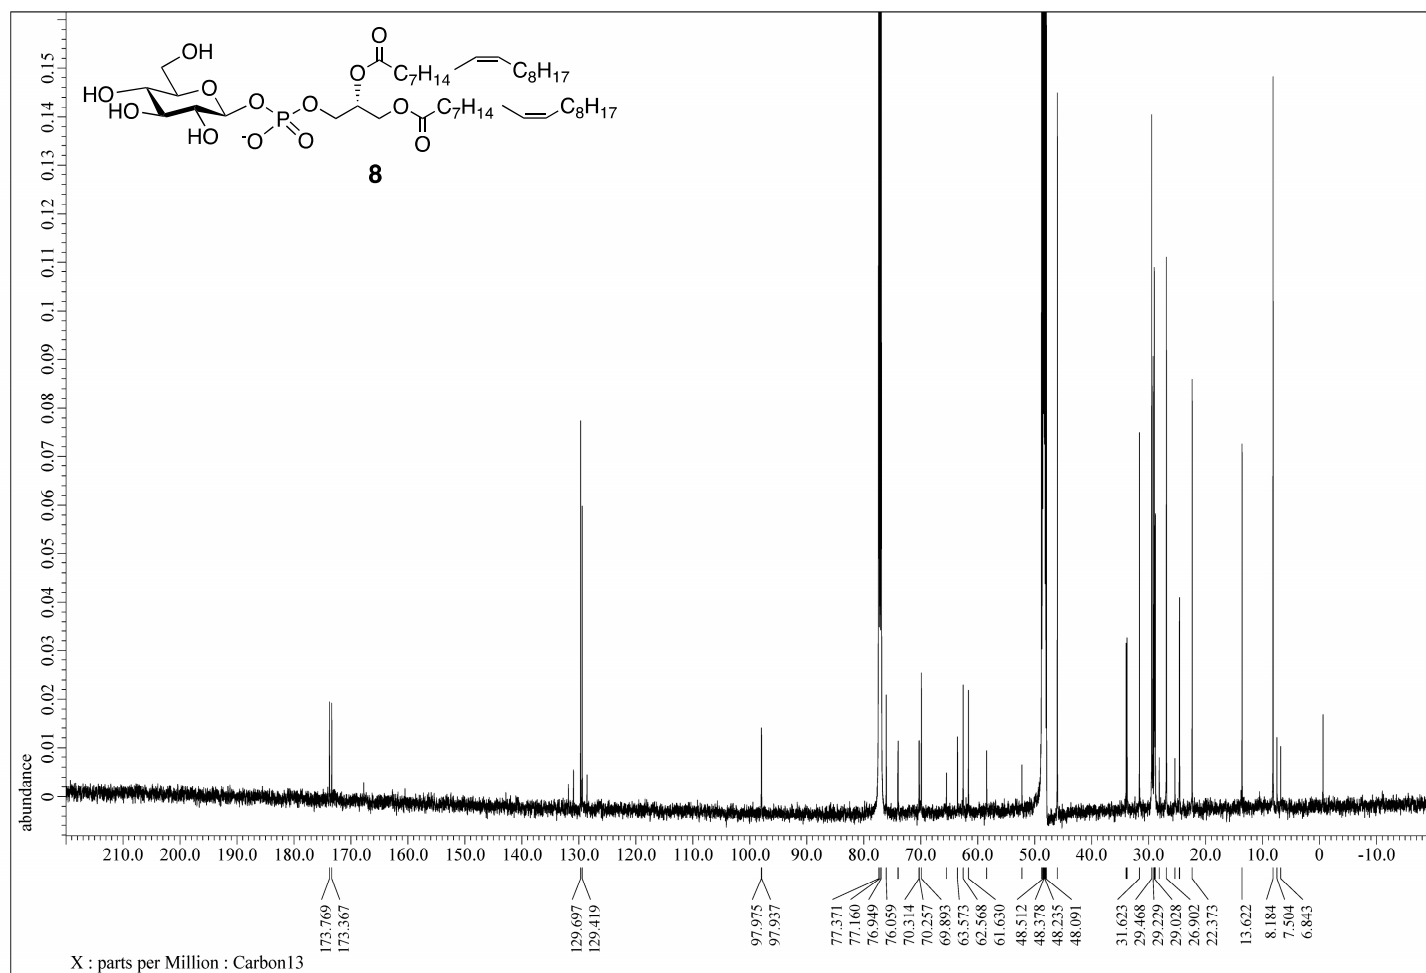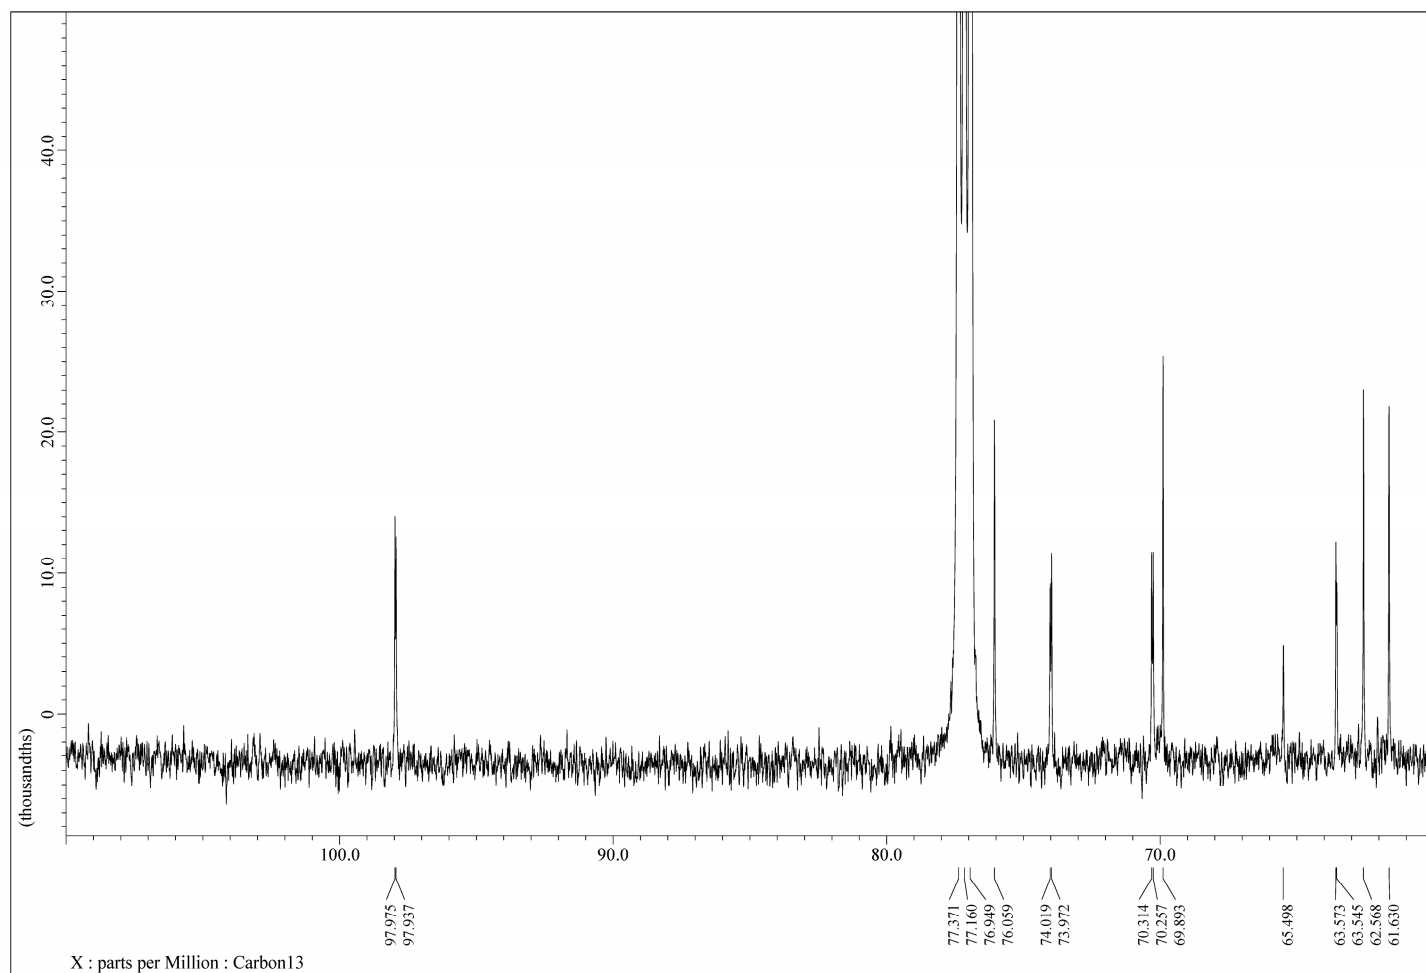

$^{31}\text{P}$ -NMR data of PtdGlc (18:1/18:1) (**8**), 243 MHz,  $\text{CDCl}_3/\text{CD}_3\text{OD} = 2/1$

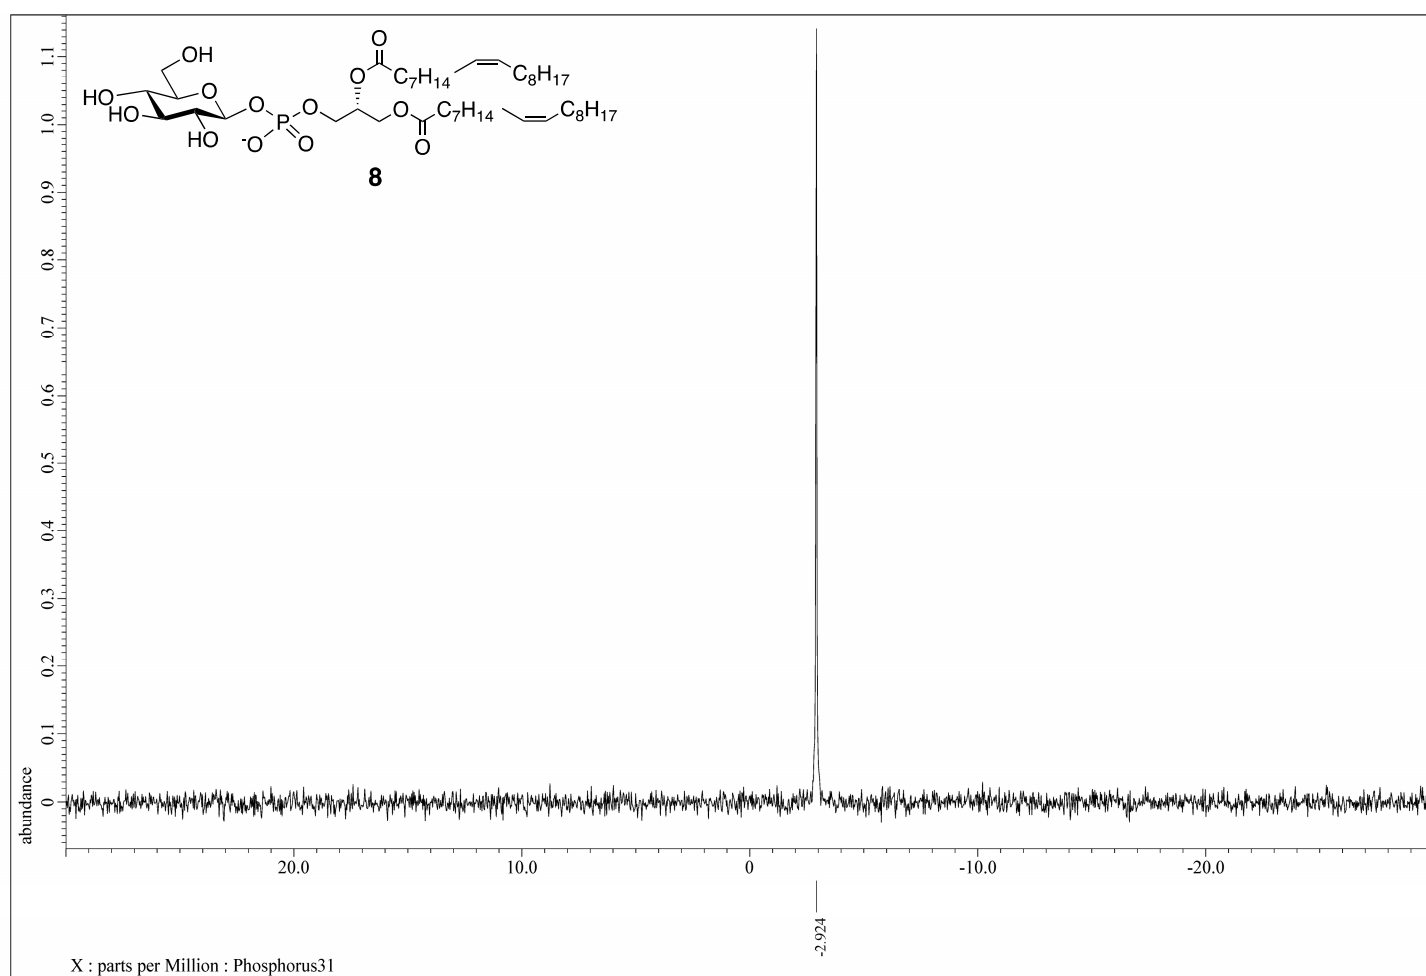

$^1\text{H}$ -NMR data of PtdGlc (18:0/16:0) (**10**), 600 MHz,  $\text{CDCl}_3/\text{CD}_3\text{OD} = 2/1$

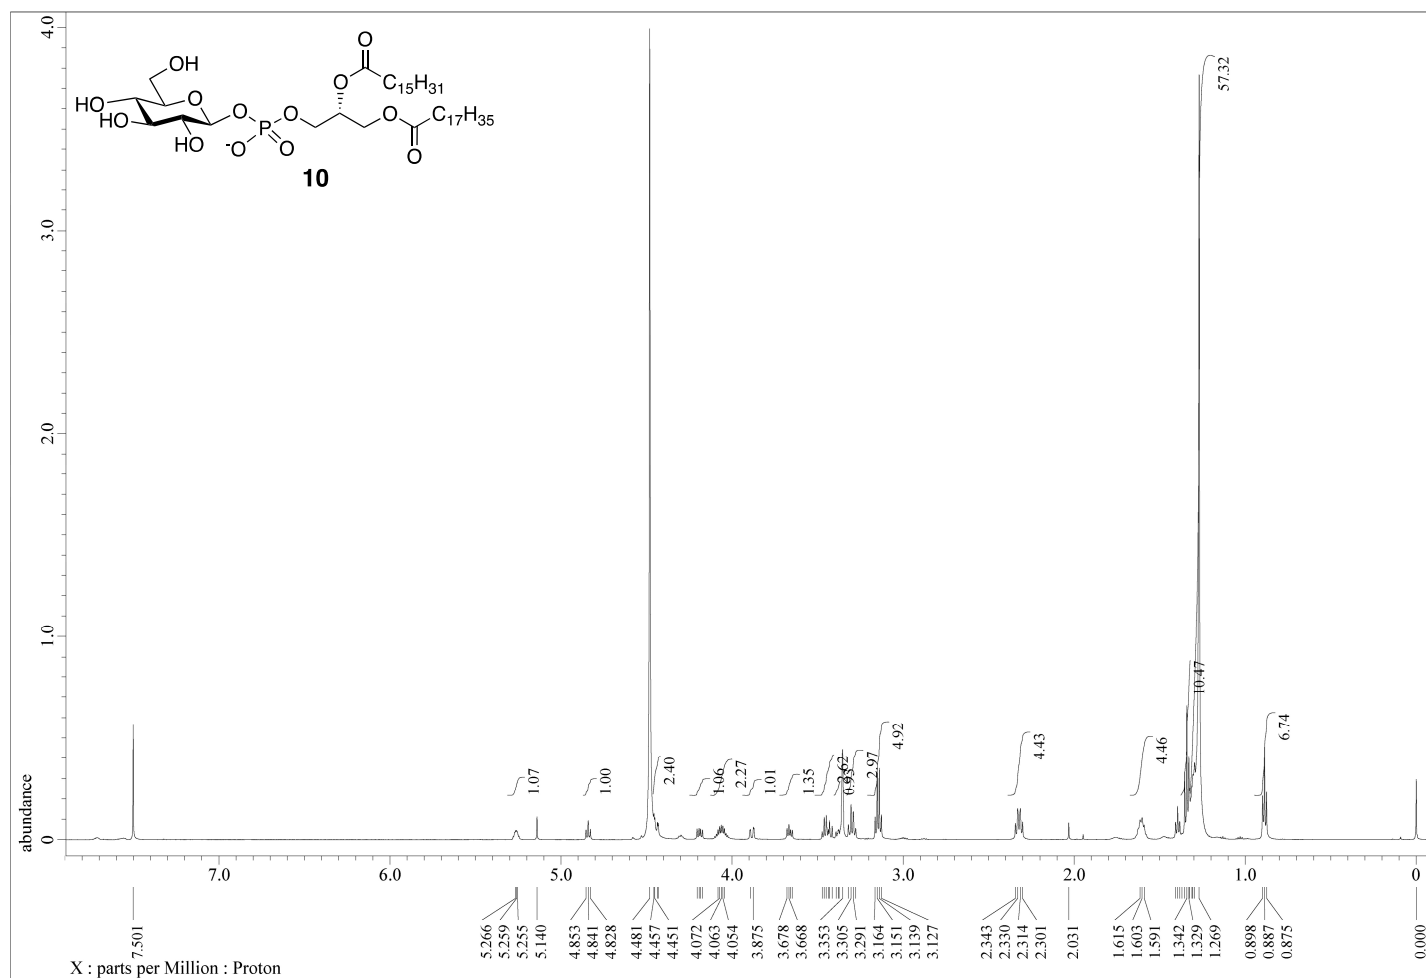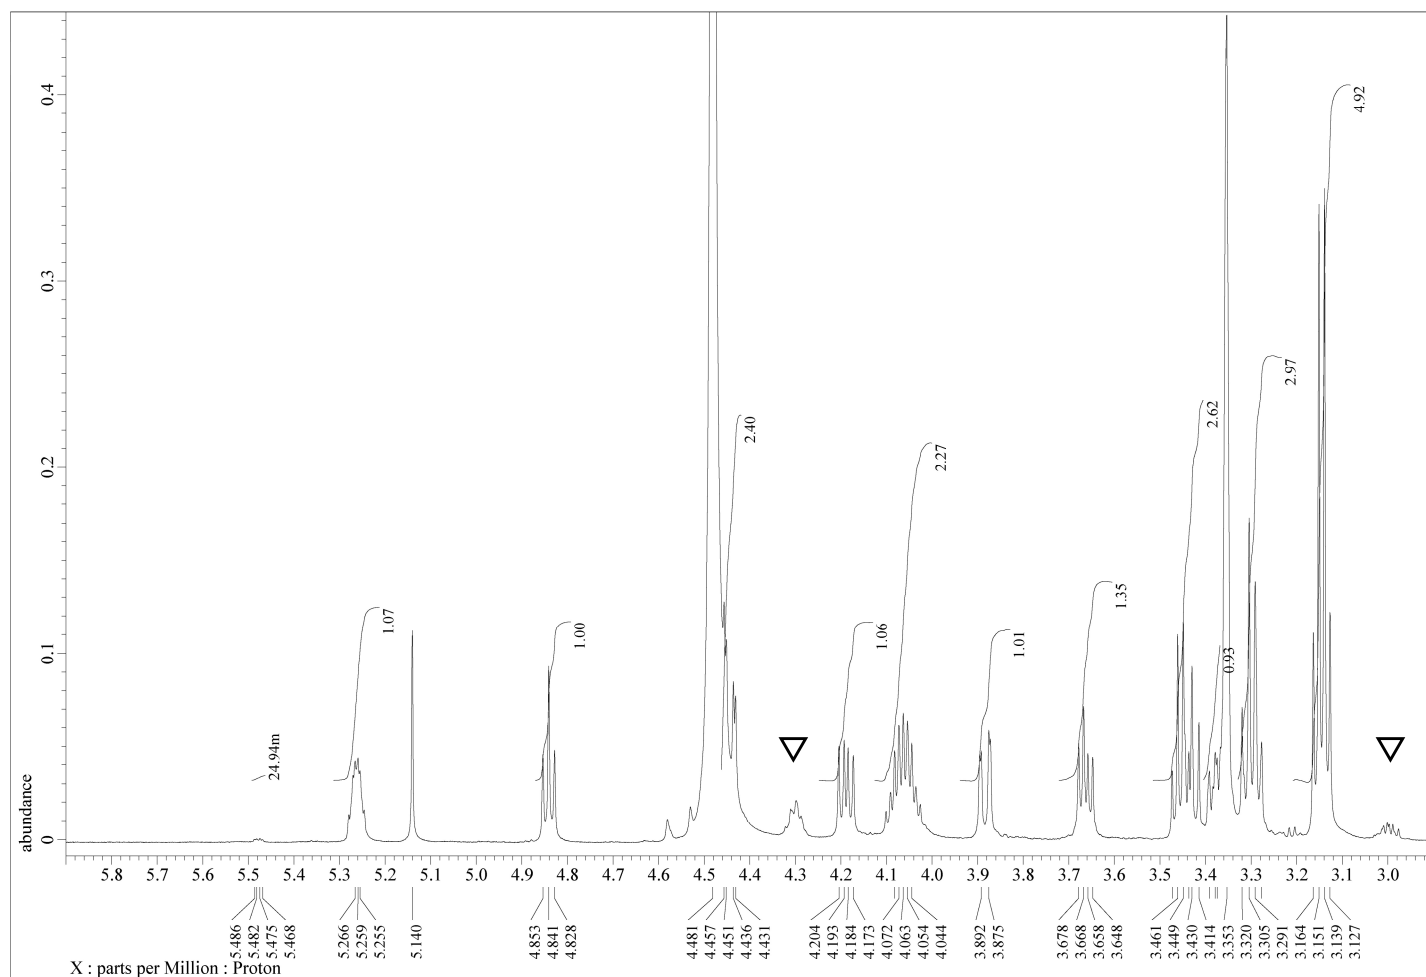



$^{13}\text{C}$ -NMR data of PtdGlc (18:0/16:0) (**10**), 150 MHz,  $\text{CDCl}_3/\text{CD}_3\text{OD} = 2/1$

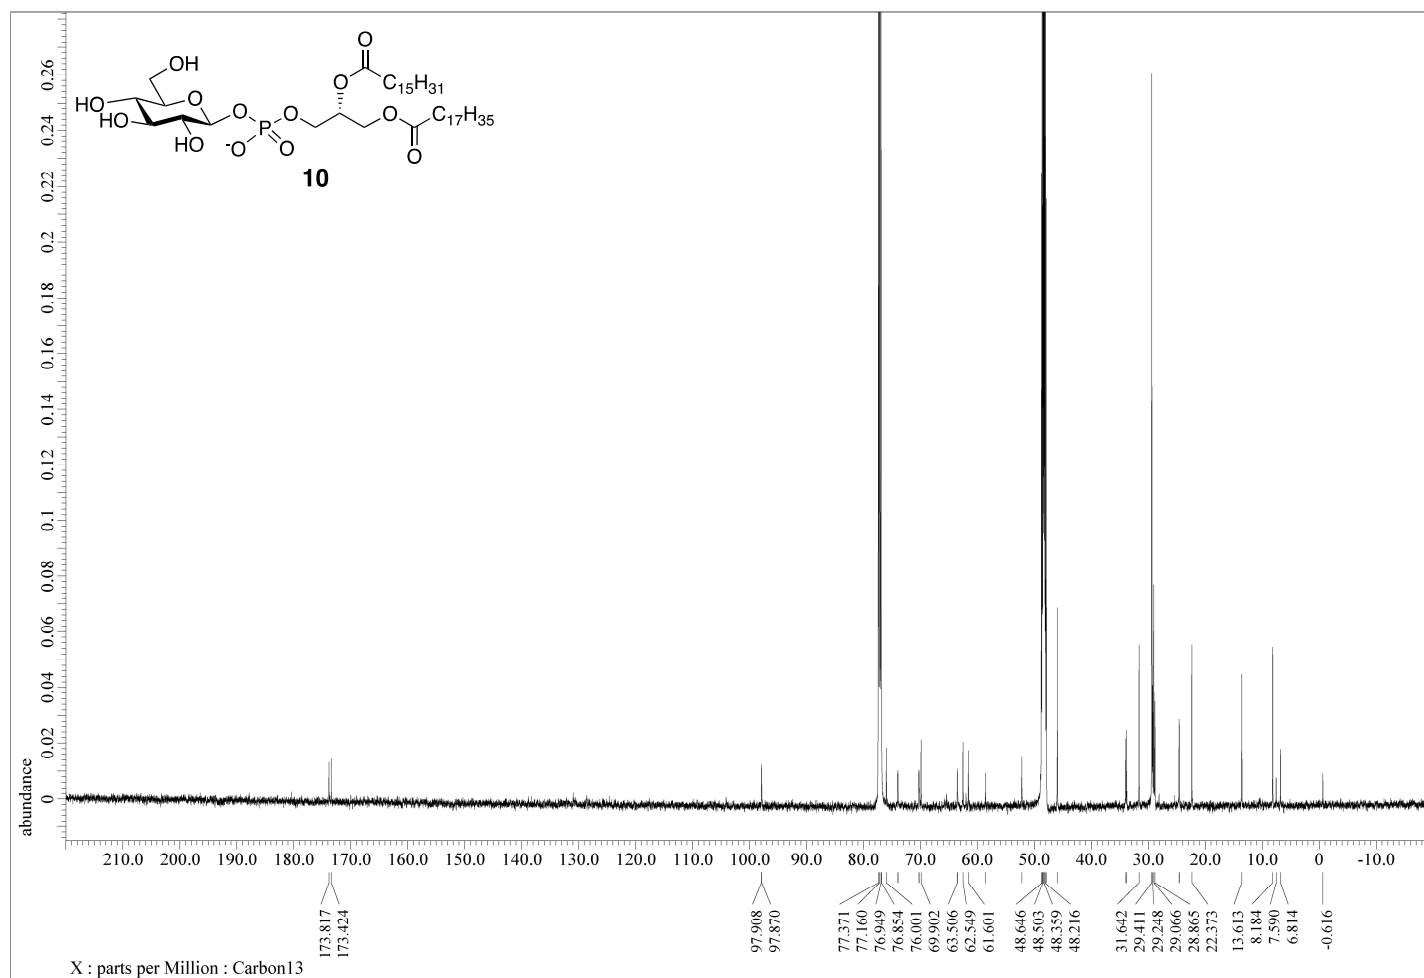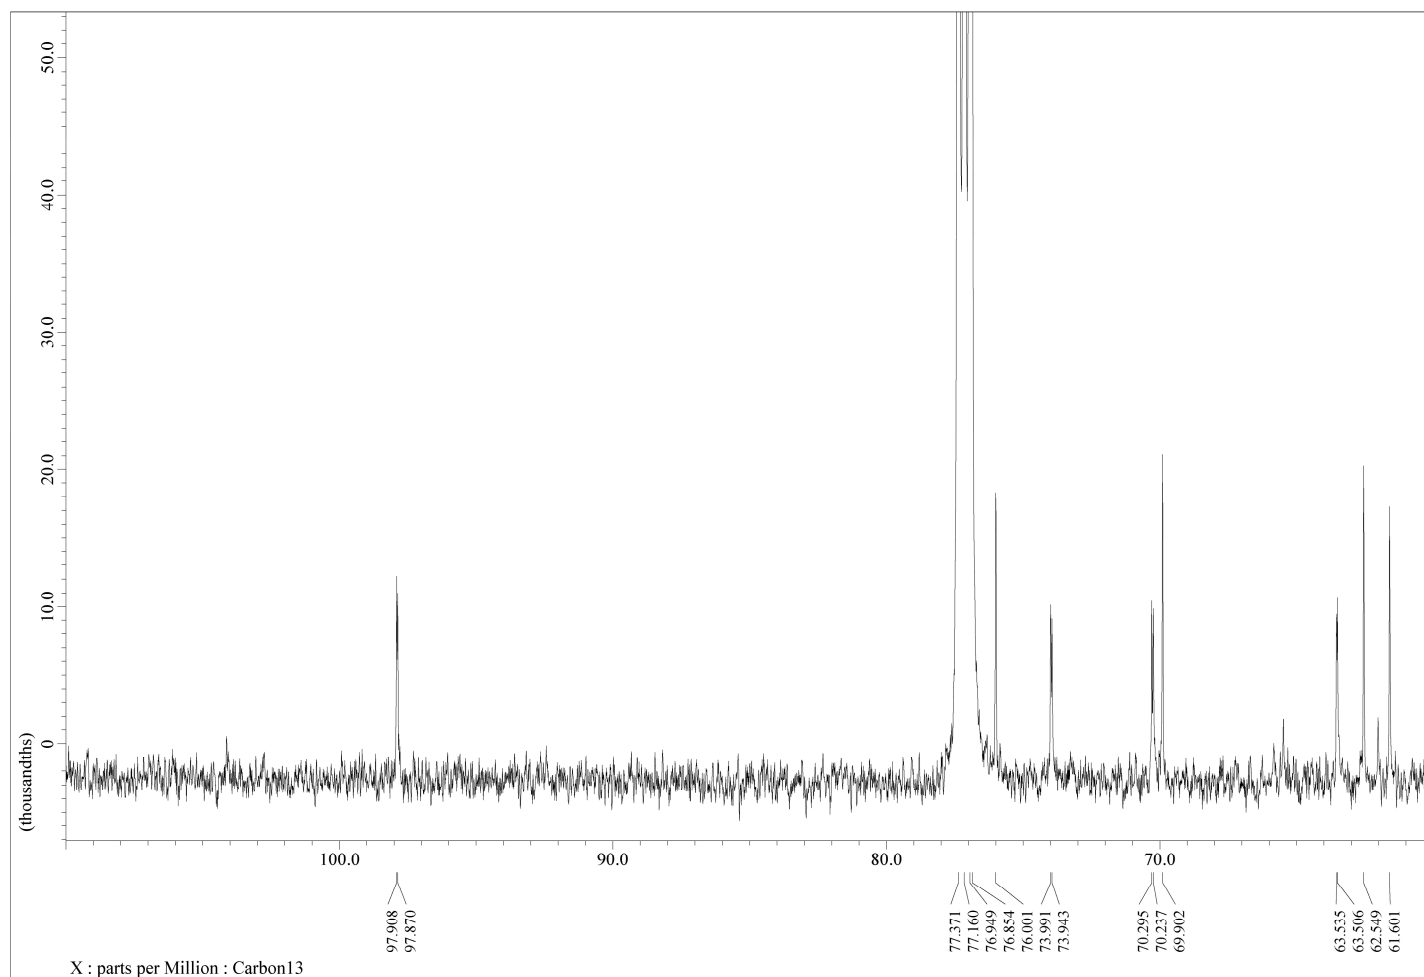

$^{31}\text{P}$ -NMR data of PtdGlc (18:0/16:0) (**10**), 243 MHz,  $\text{CDCl}_3/\text{CD}_3\text{OD} = 2/1$

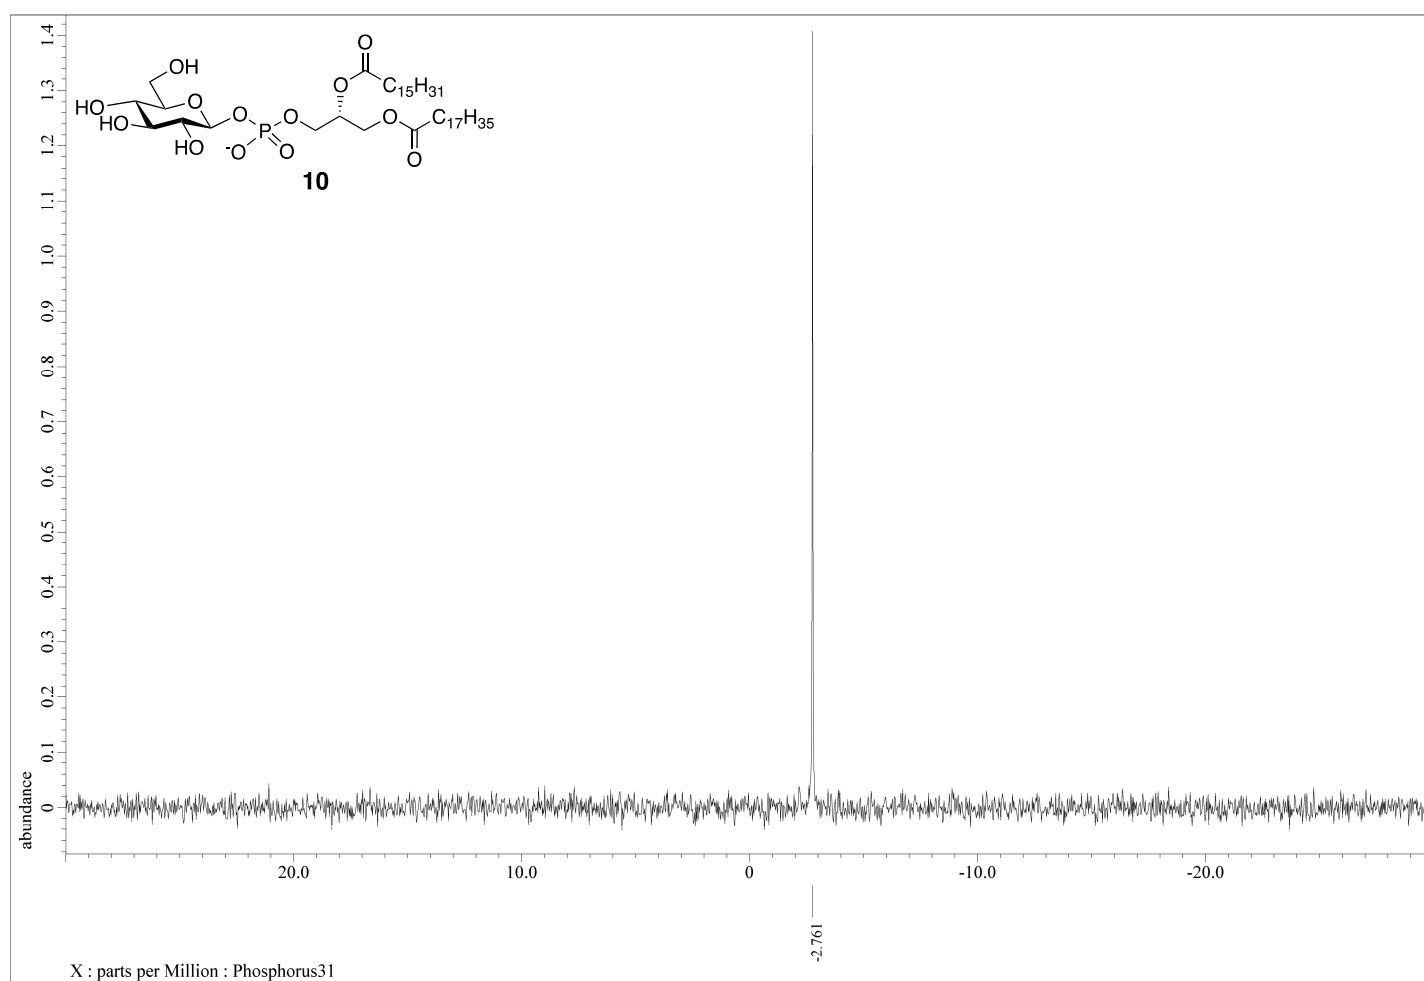

$^1\text{H}$ -NMR data of PtdGlc (16:0/18:0) (**12**), 600 MHz,  $\text{CDCl}_3/\text{CD}_3\text{OD} = 2/1$

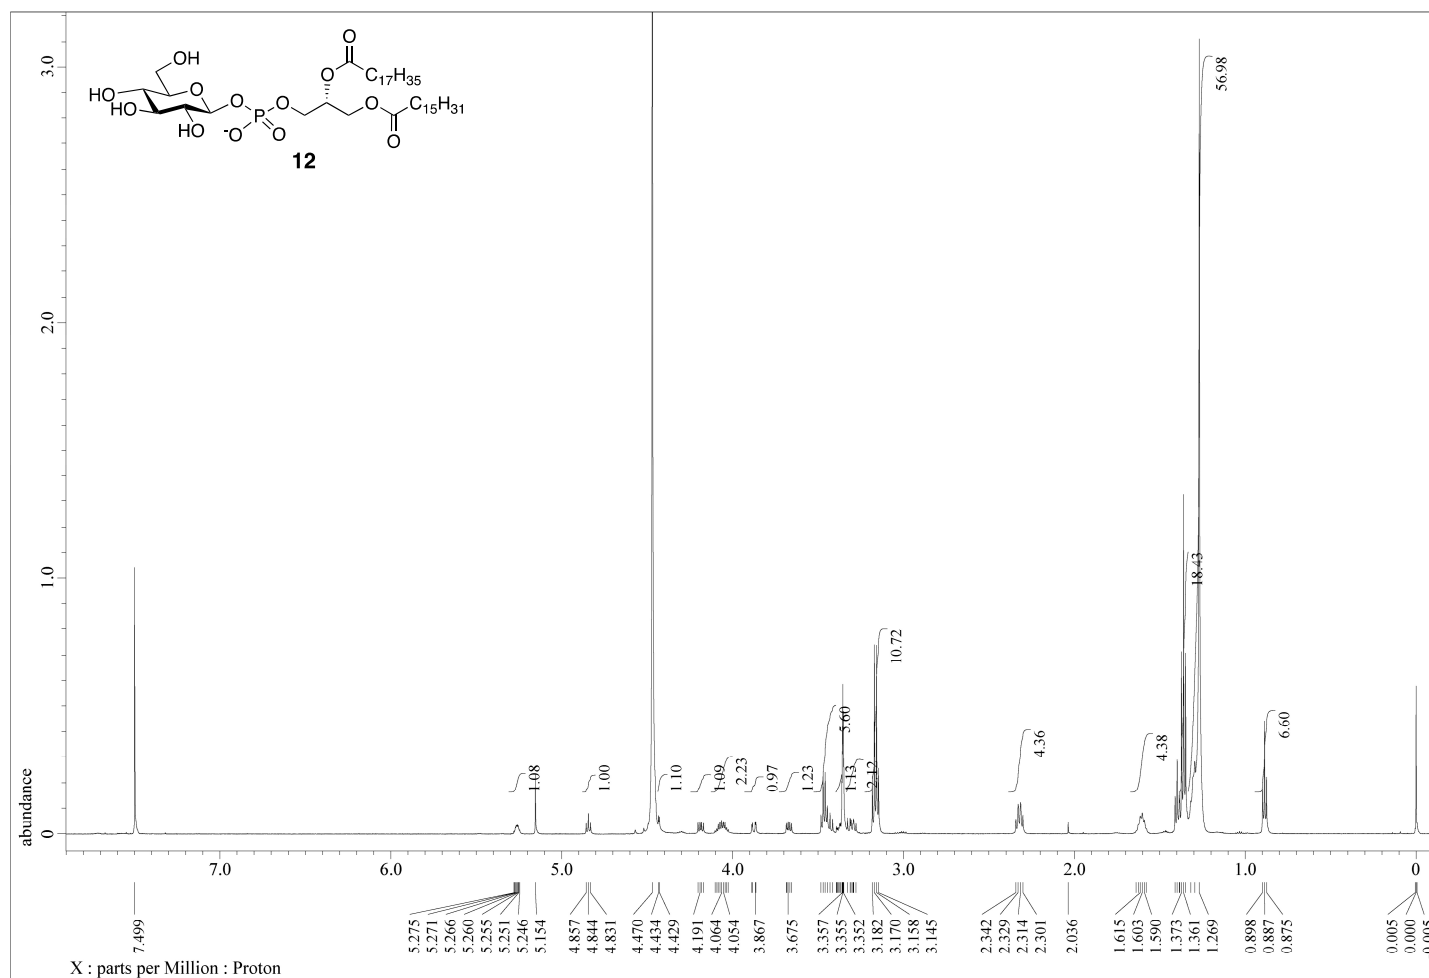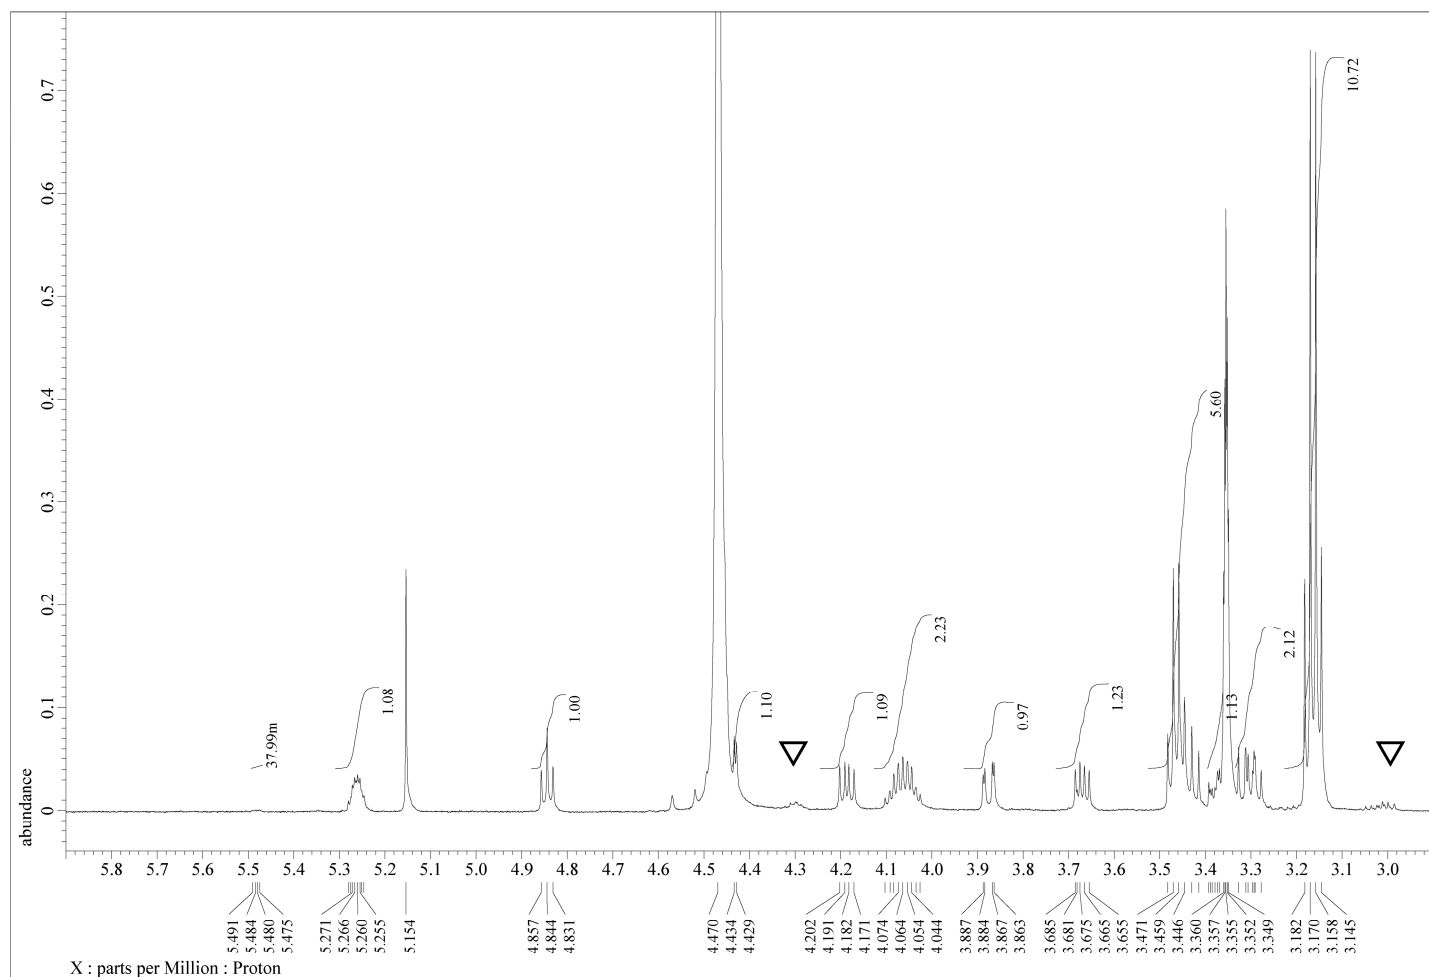

$^{13}\text{C}$ -NMR data of PtdGlc (16:0/18:0) (**12**), 150 MHz,  $\text{CDCl}_3/\text{CD}_3\text{OD} = 2/1$

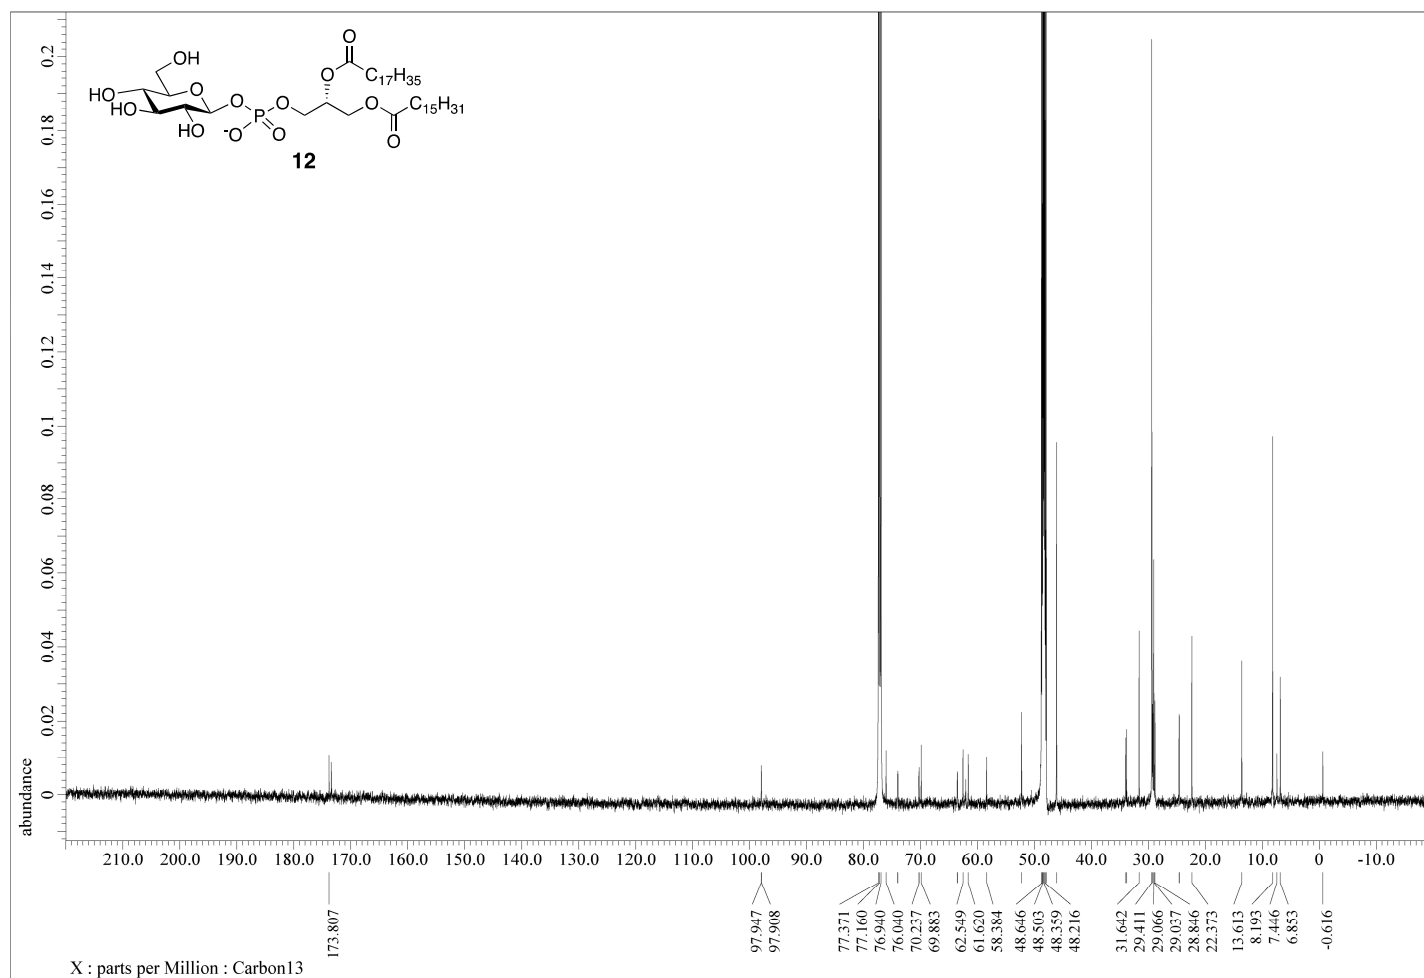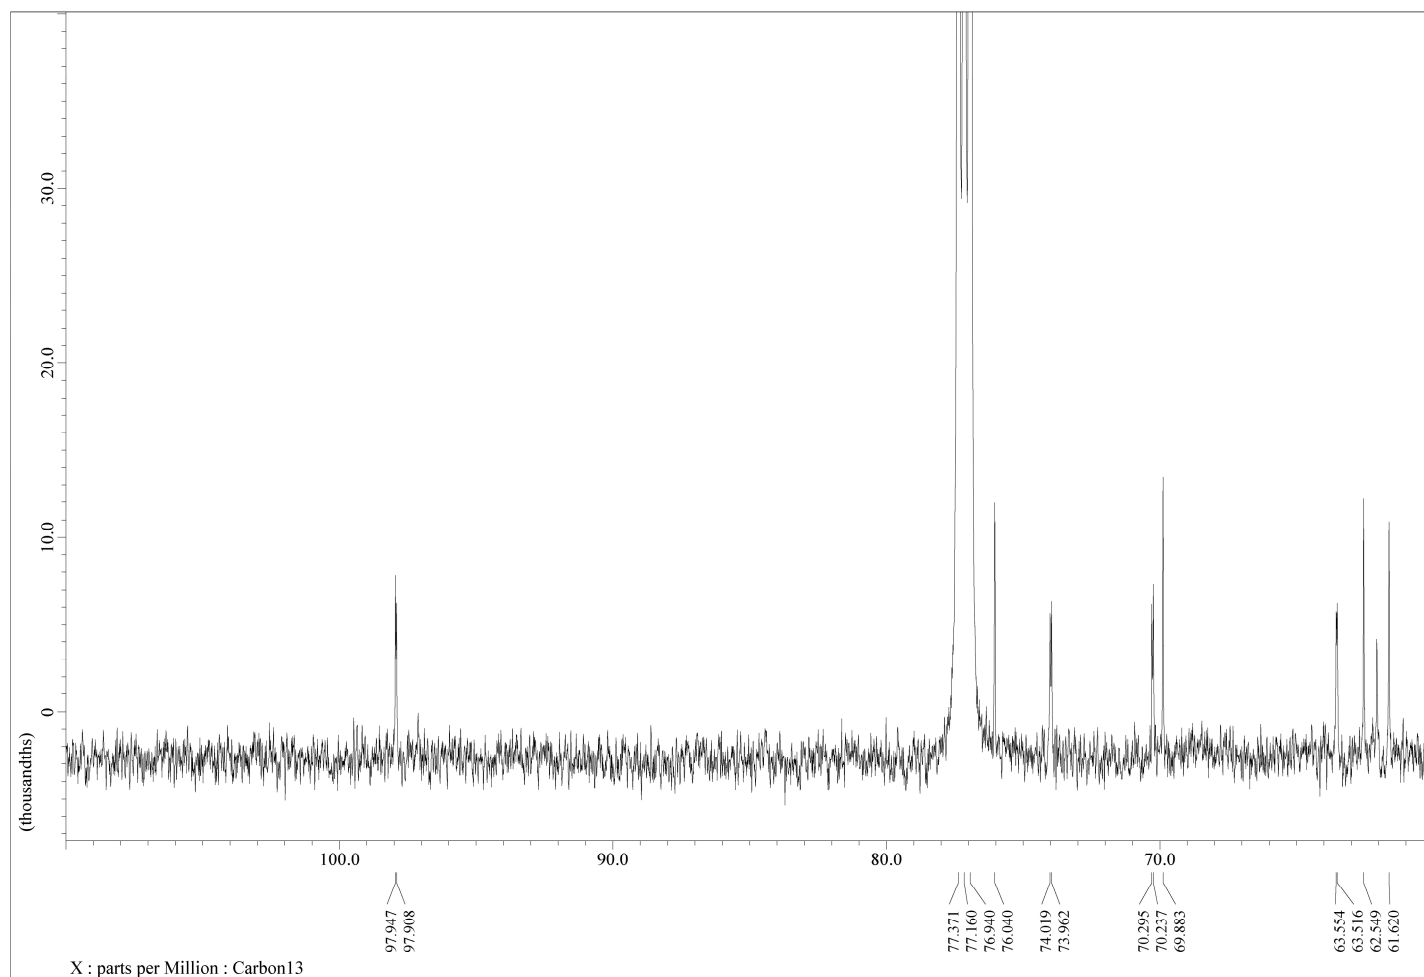

$^{31}\text{P}$ -NMR data of PtdGlc (16:0/18:0) (**12**), 243 MHz,  $\text{CDCl}_3/\text{CD}_3\text{OD} = 2/1$

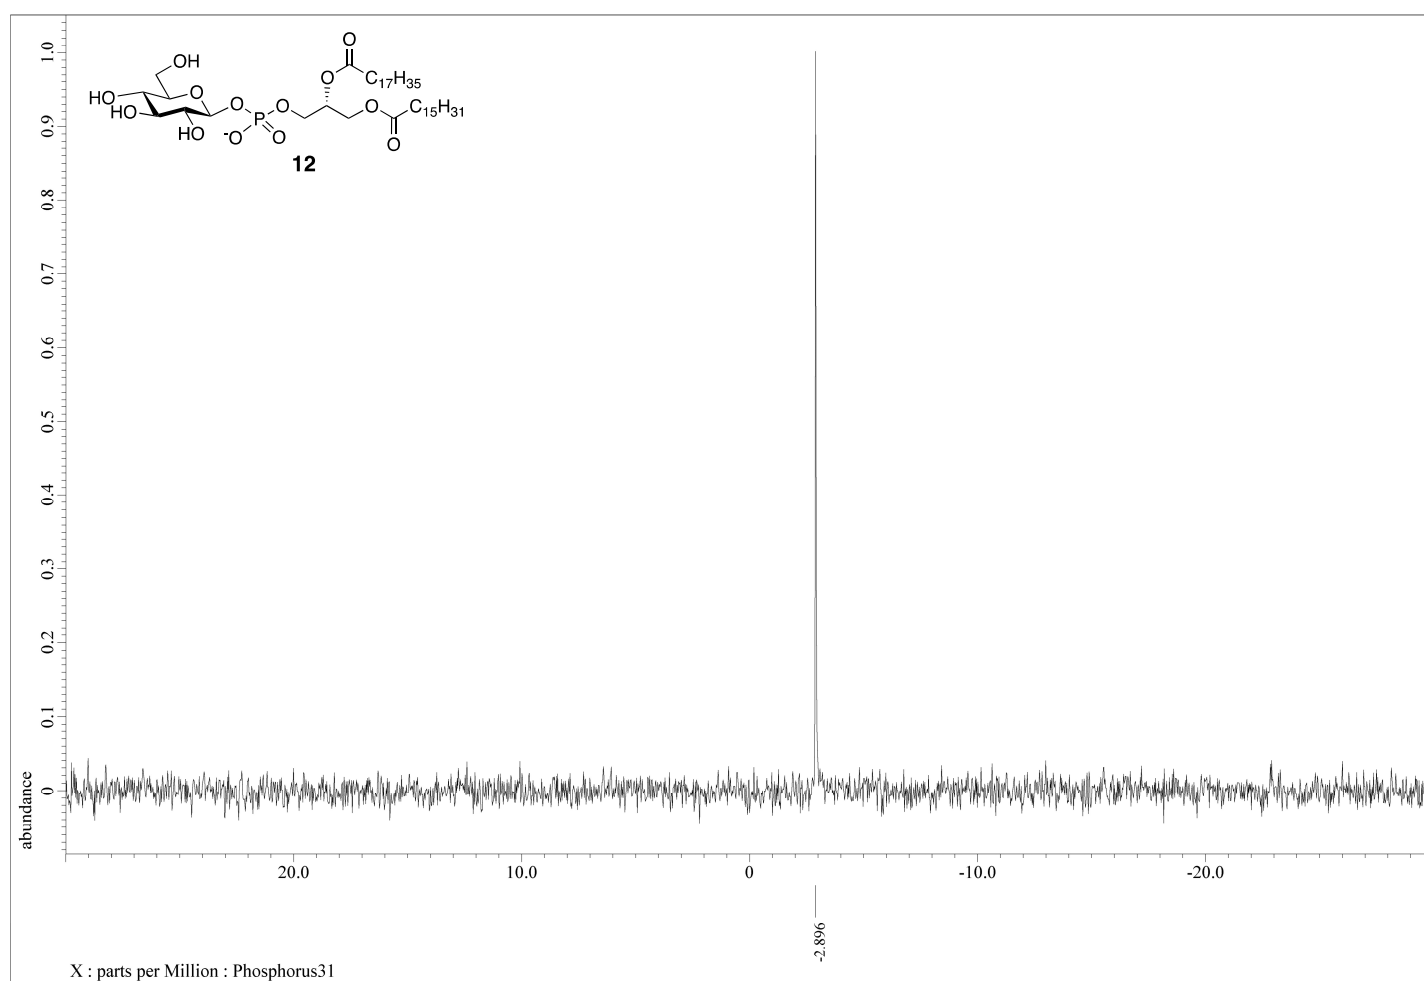

<sup>1</sup>H-NMR data of PtdGlc (16:0/16:0) (**14**), 600 MHz, CDCl<sub>3</sub>/CD<sub>3</sub>OD = 2/1

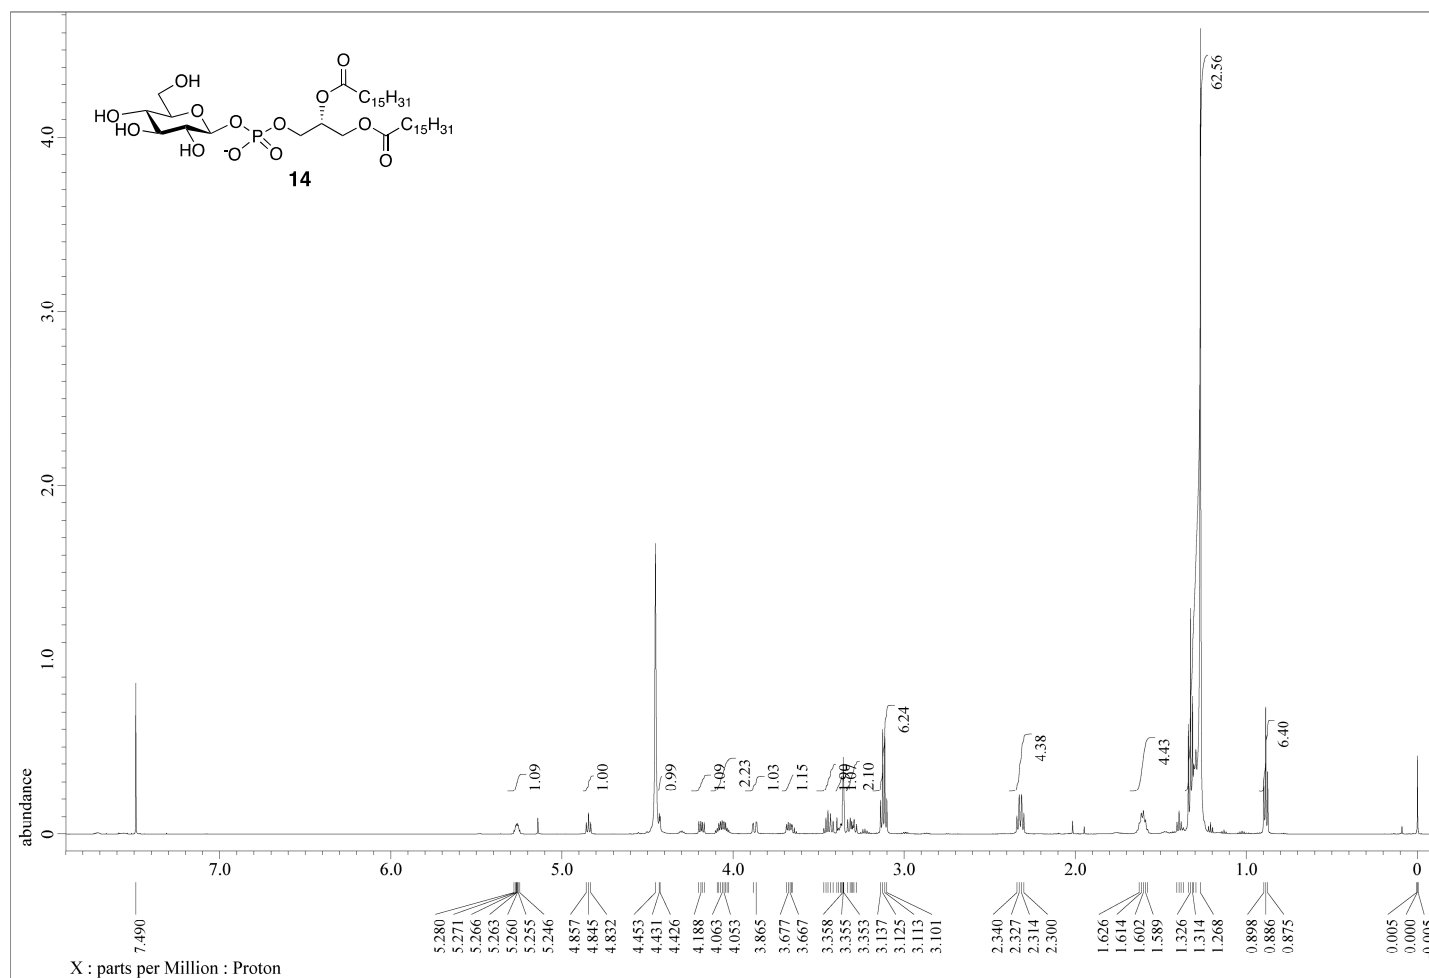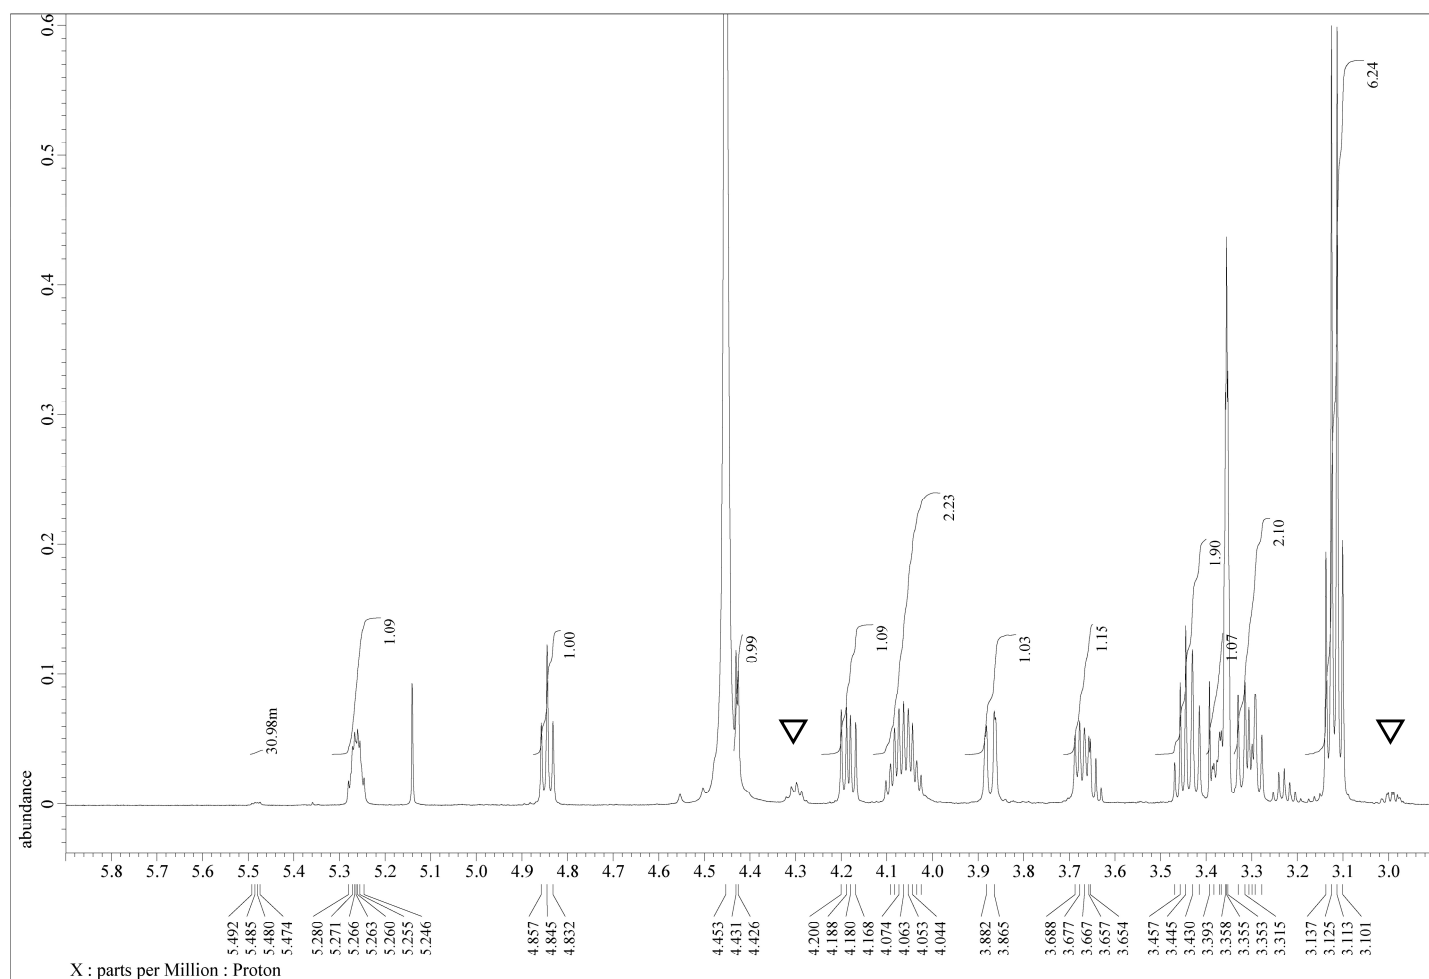

$^{13}\text{C}$ -NMR data of PtdGlc (16:0/16:0) (**14**), 150 MHz,  $\text{CDCl}_3/\text{CD}_3\text{OD} = 2/1$

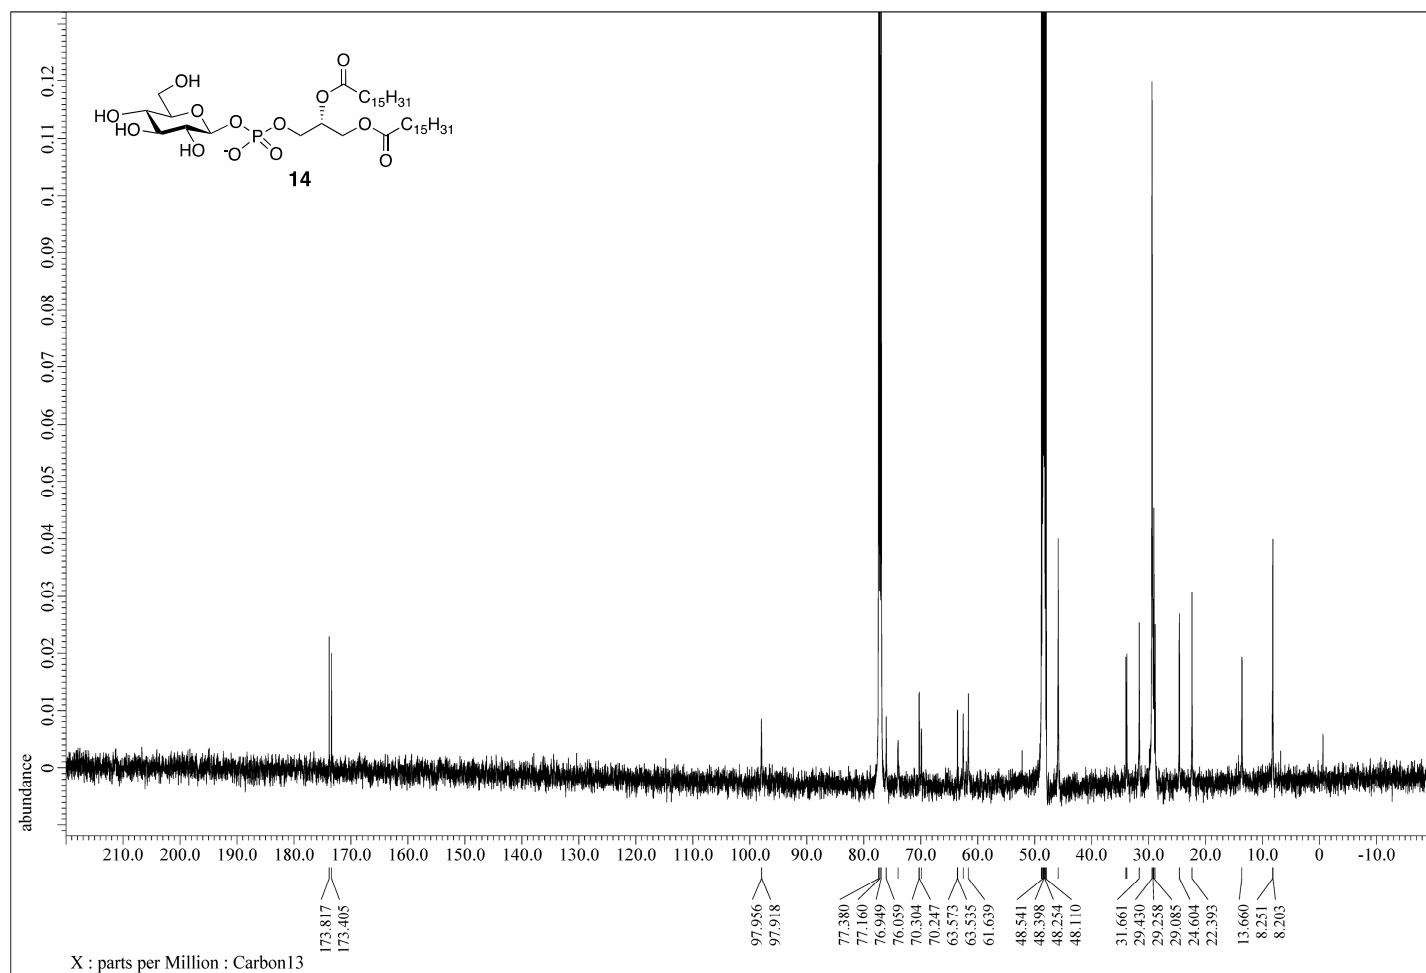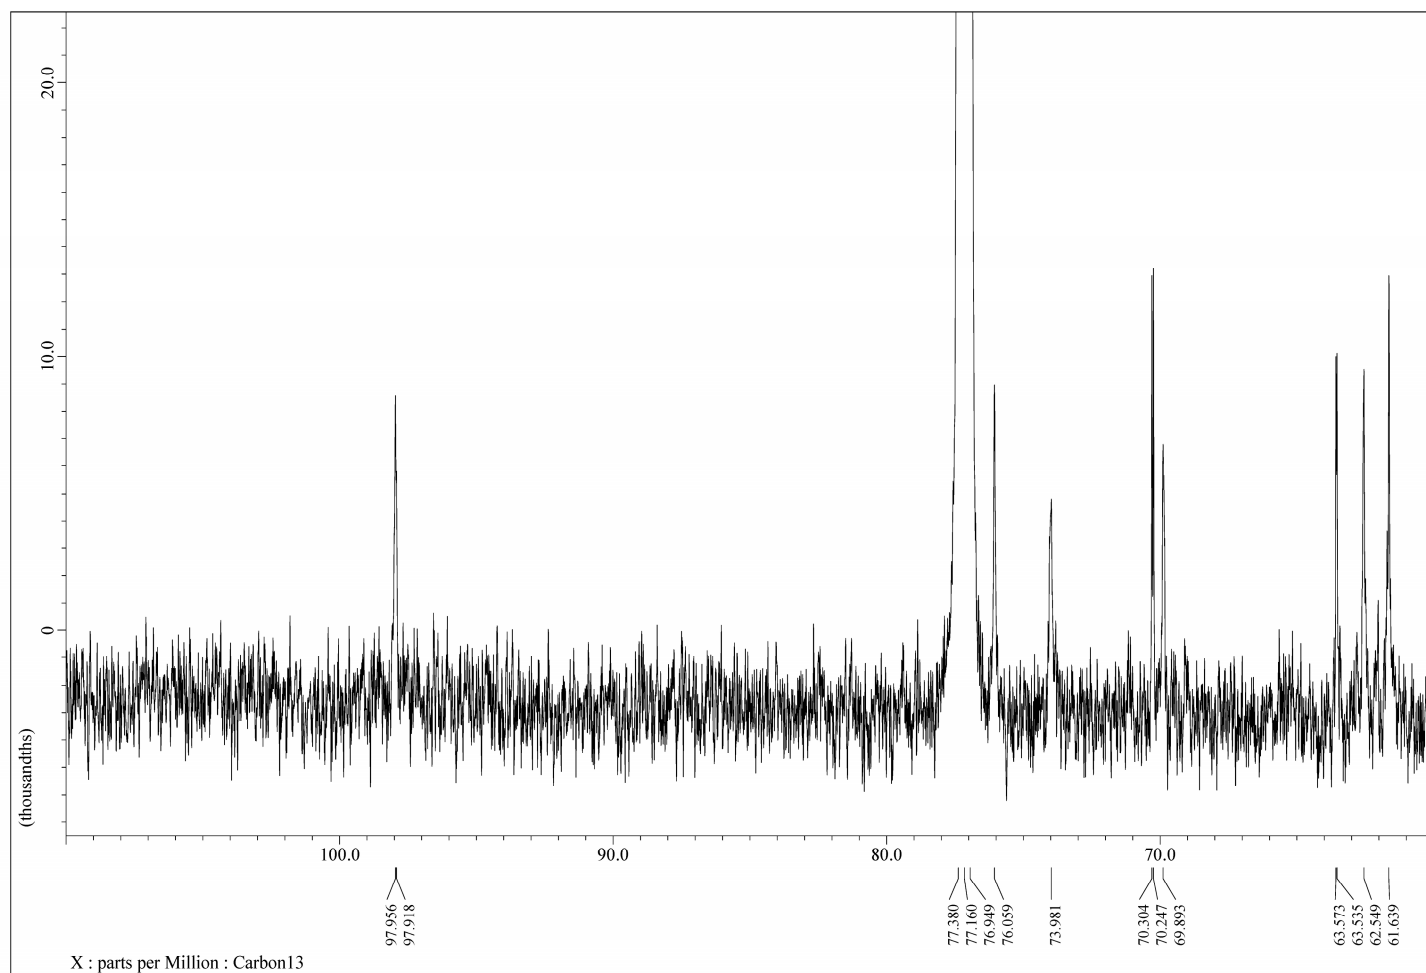

$^{31}\text{P}$ -NMR data of PtdGlc (16:0/16:0) (**14**), 243 MHz,  $\text{CDCl}_3/\text{CD}_3\text{OD} = 2/1$

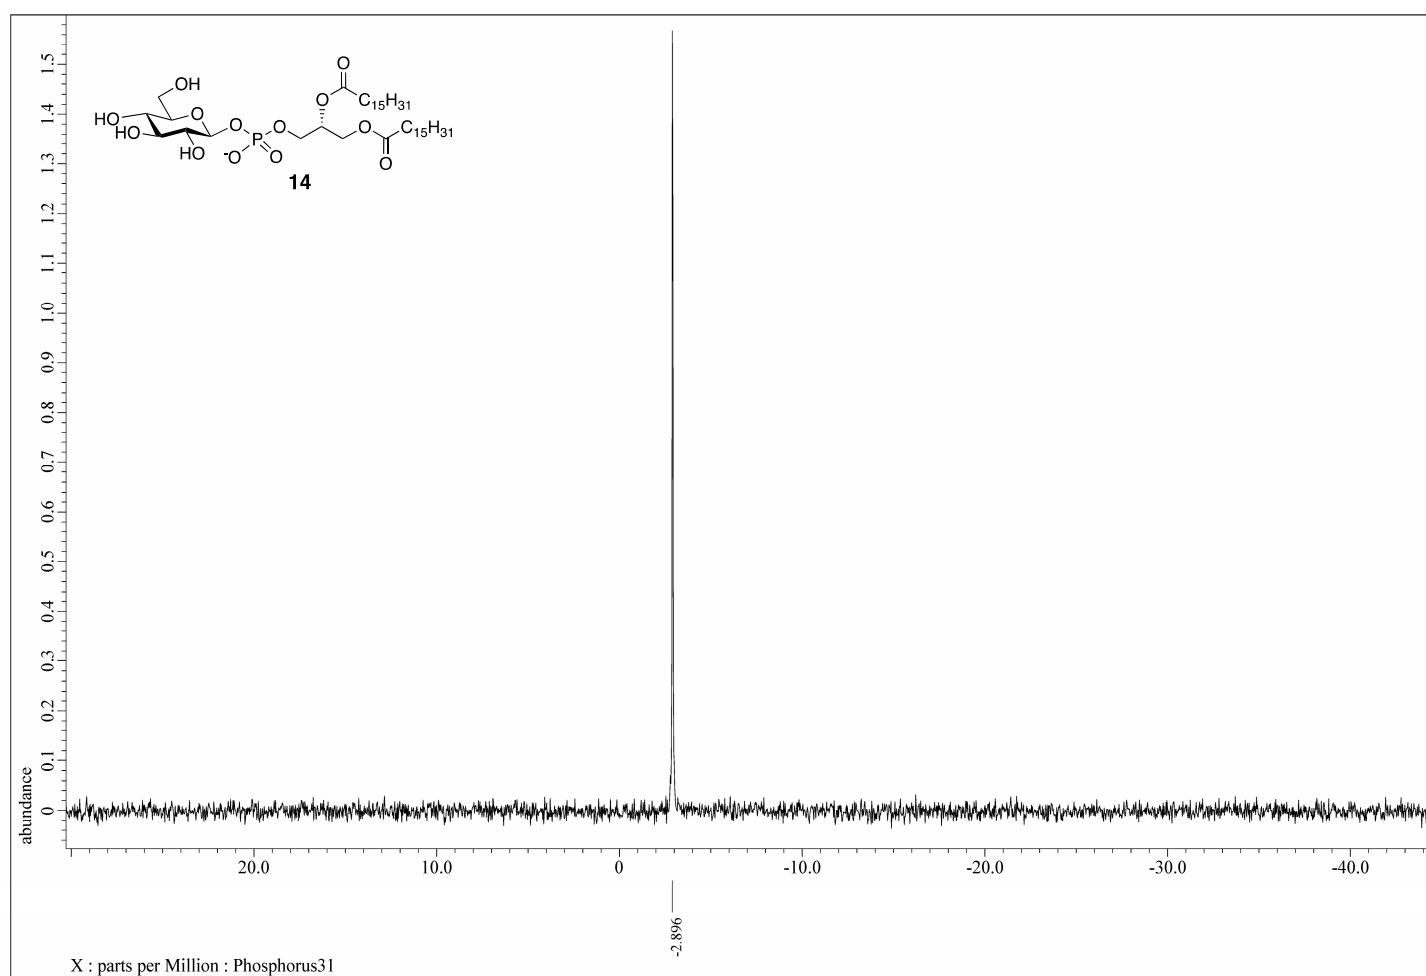



$^1\text{H}$ -NMR data of PtdGlc (16:0/16:0) (**14**) from PA(16:0, 16:0) sodium salt (for Table 3, entry 6)  
600 MHz,  $\text{CDCl}_3/\text{CD}_3\text{OD} = 2/1$

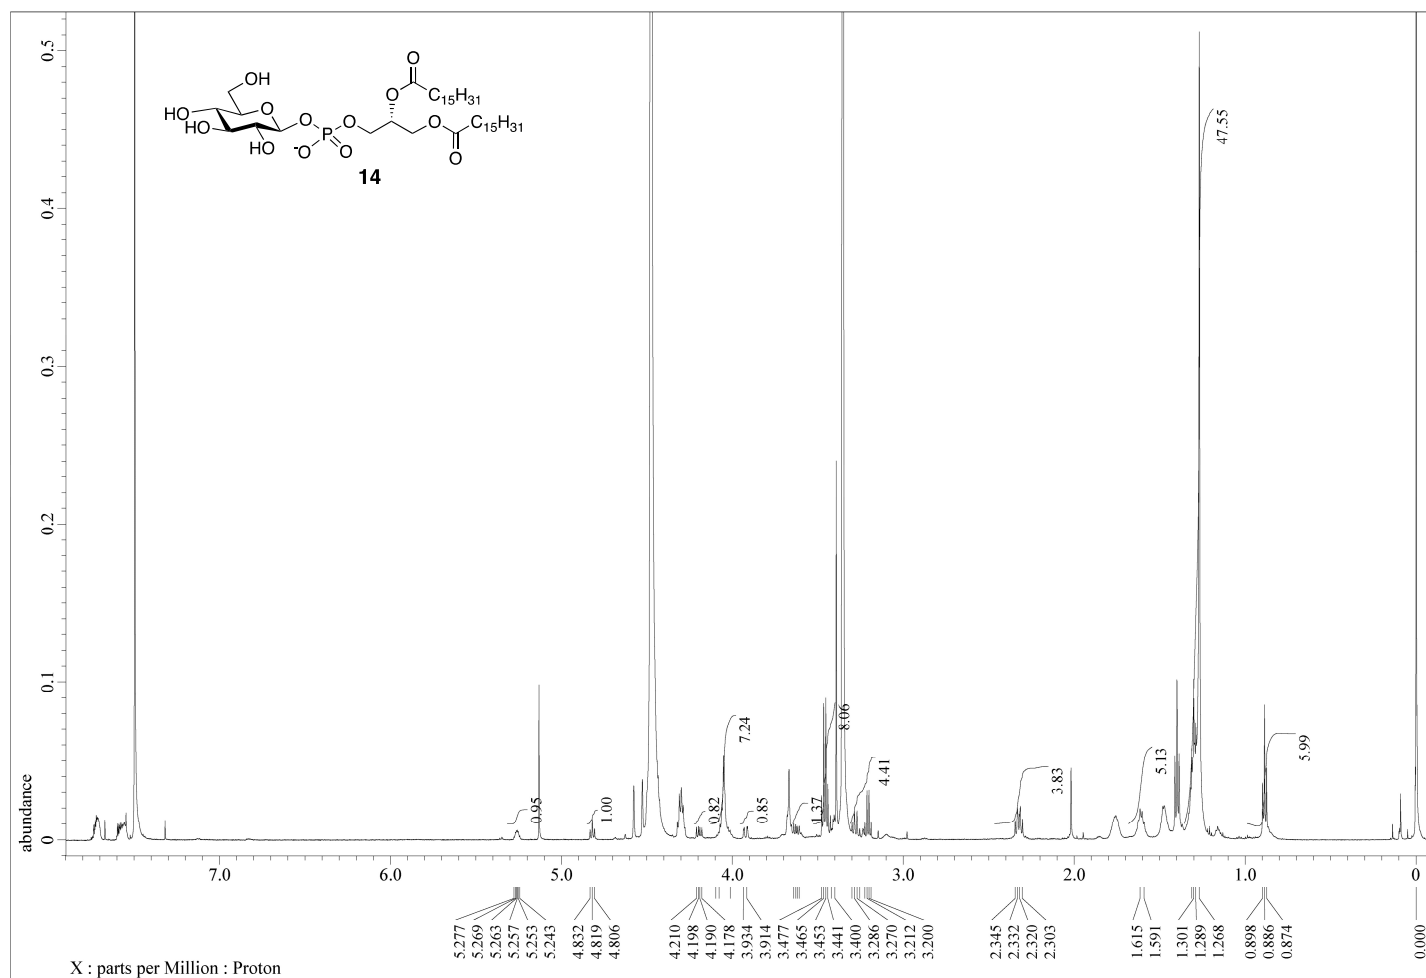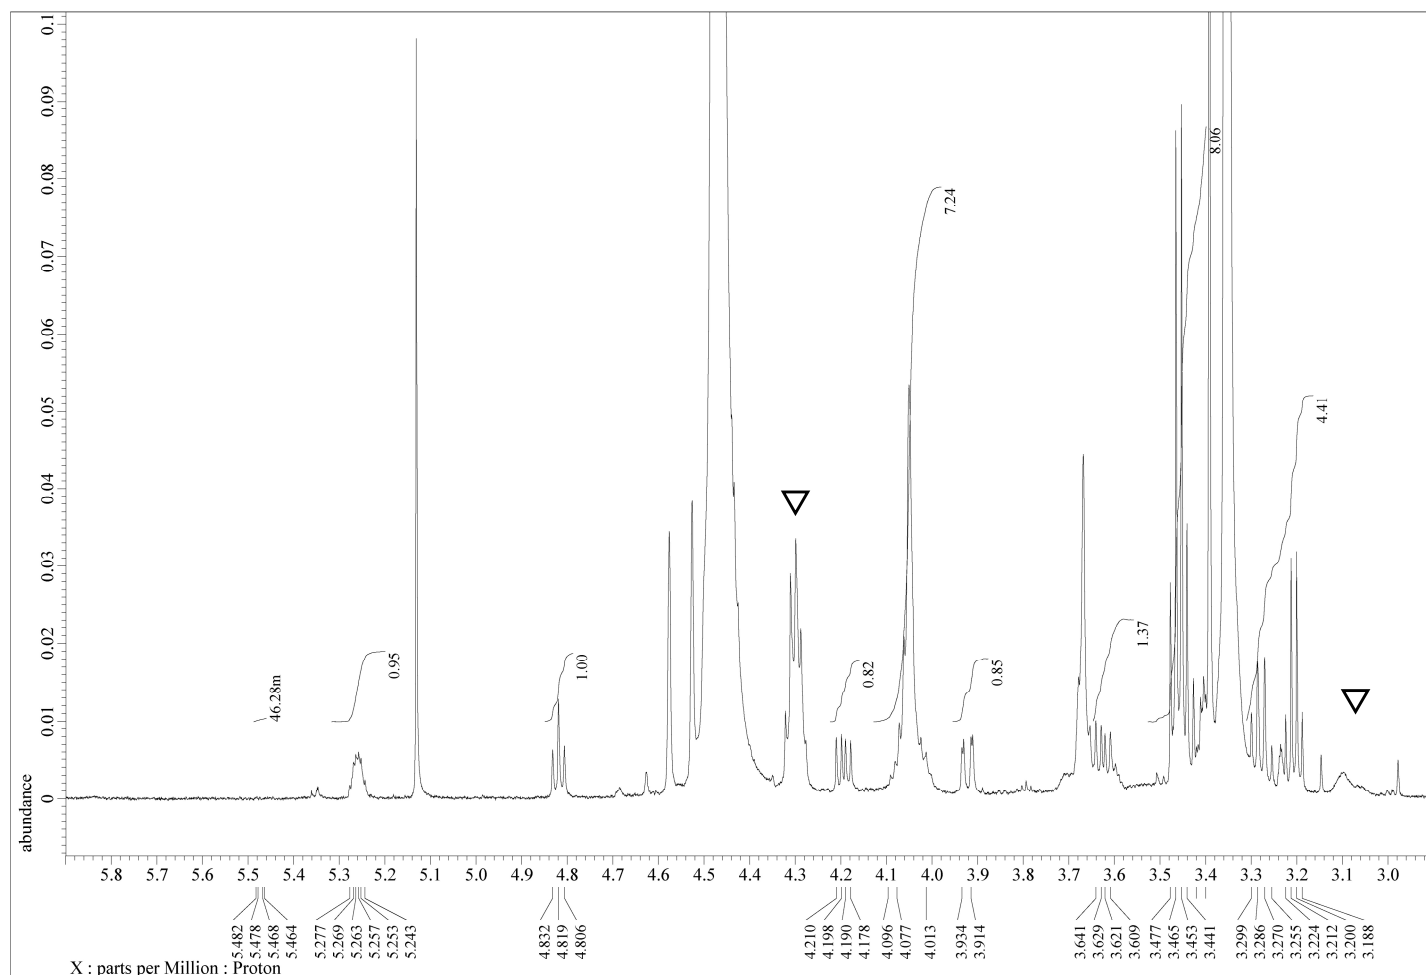

$^1\text{H}$ -NMR data of  $^{13}\text{C}$ -labeled phosphatidyl glucoside ( $\text{U-}^{13}\text{C}_6$ ) (**15**), 600 MHz,  $\text{CDCl}_3/\text{CD}_3\text{OD} = 2/1$

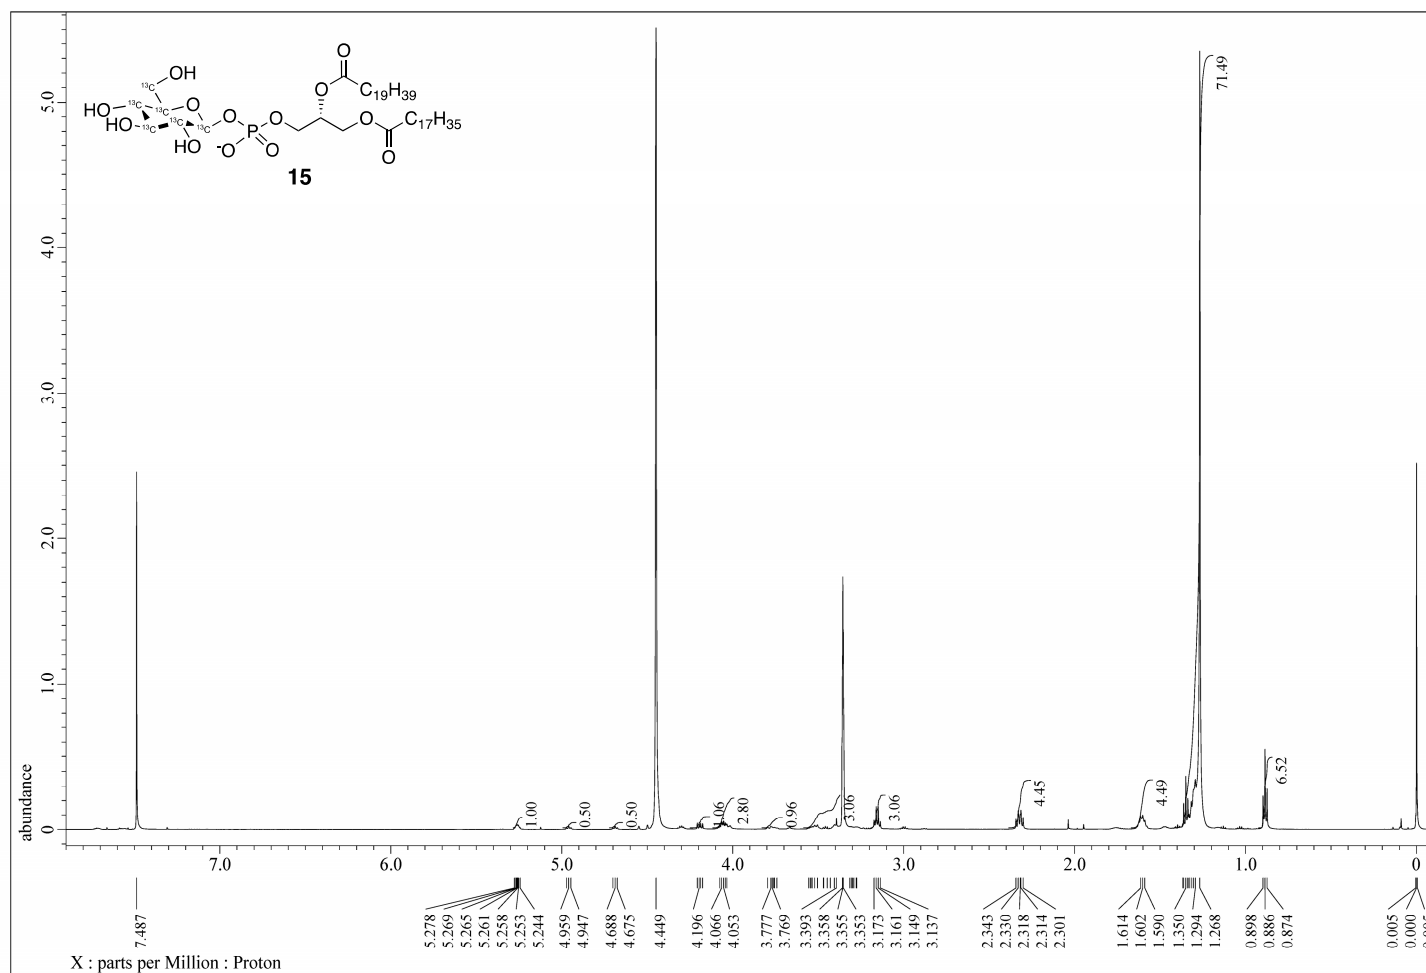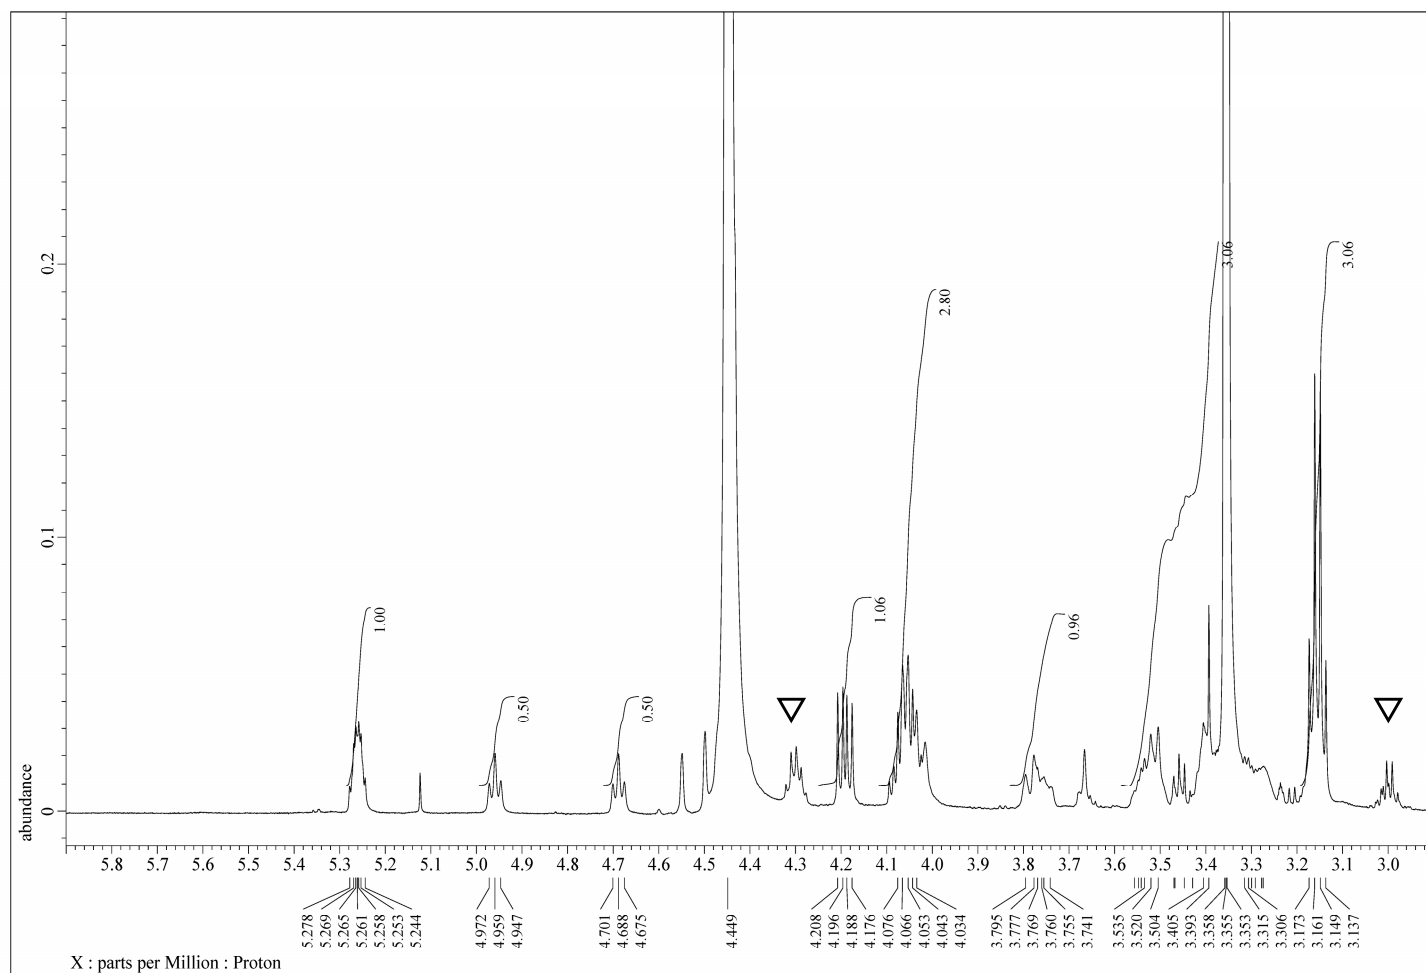

$^{13}\text{C}$ -NMR data of  $^{13}\text{C}$ -labeled phosphatidyl glucoside ( $\text{U-}^{13}\text{C}_6$ ) (**15**), 600 MHz,  $\text{CDCl}_3/\text{CD}_3\text{OD} = 2/1$

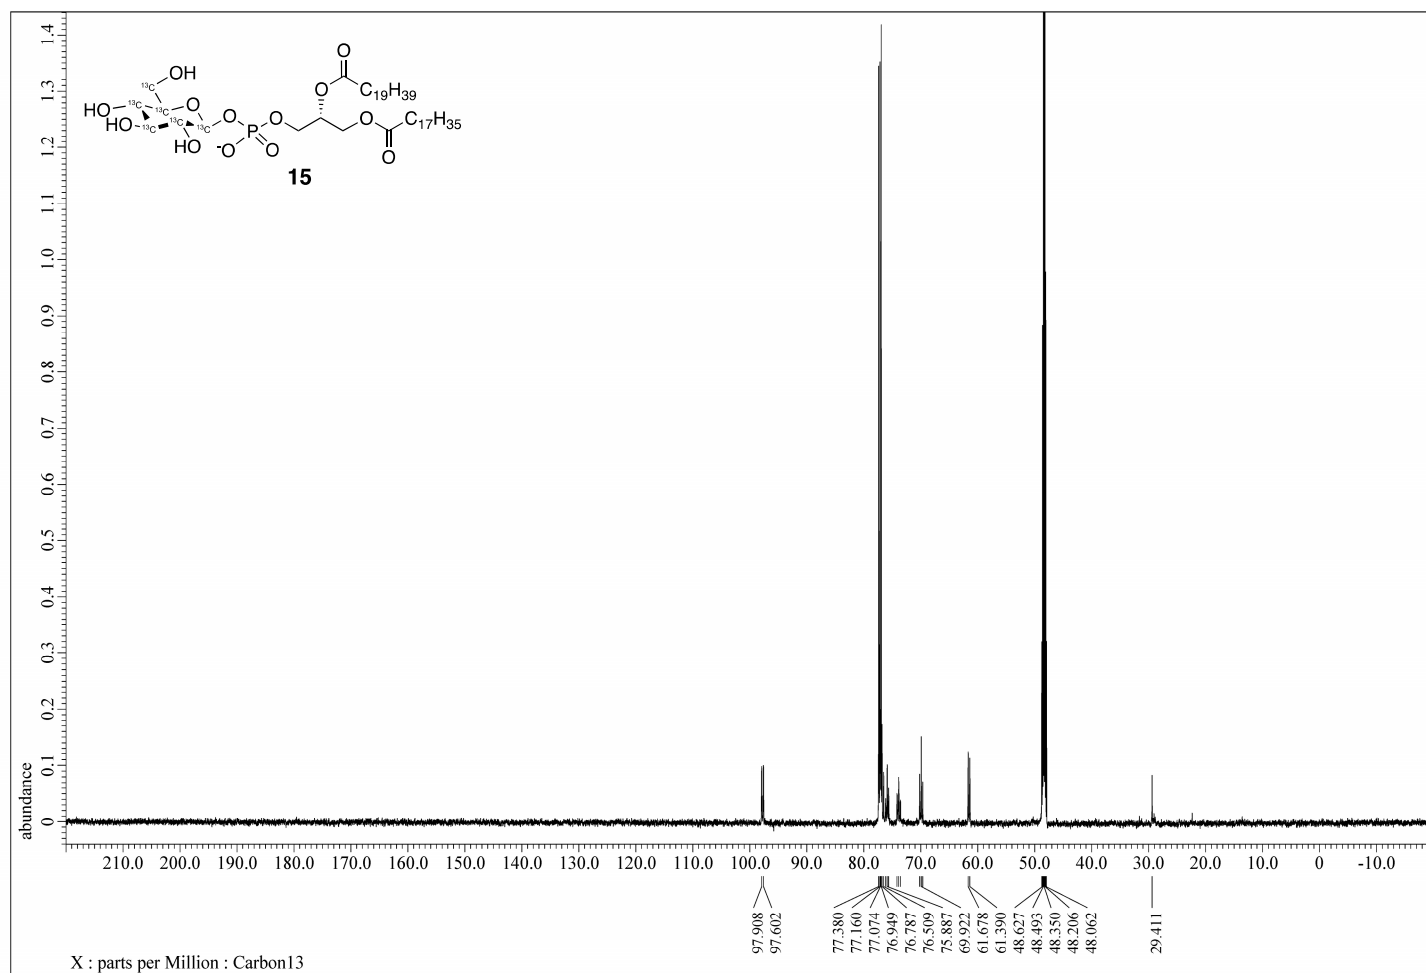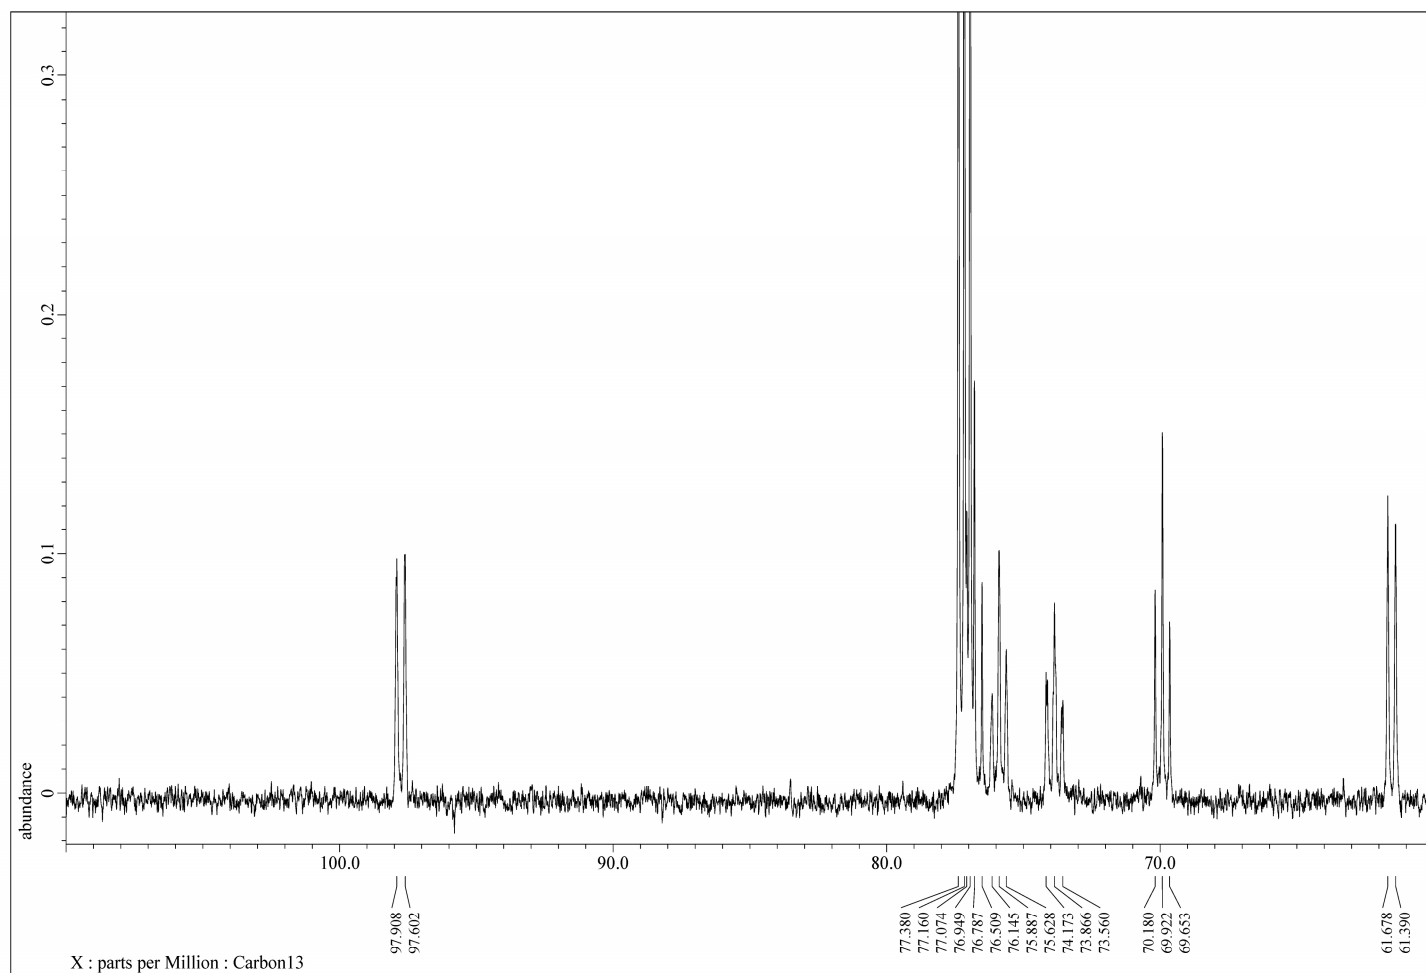

$^{31}\text{P}$ -NMR data of  $^{13}\text{C}$ -labeled phosphatidyl glucoside ( $\text{U-}^{13}\text{C}_6$ ) (**15**), 243 MHz,  $\text{CDCl}_3/\text{CD}_3\text{OD} = 2/1$

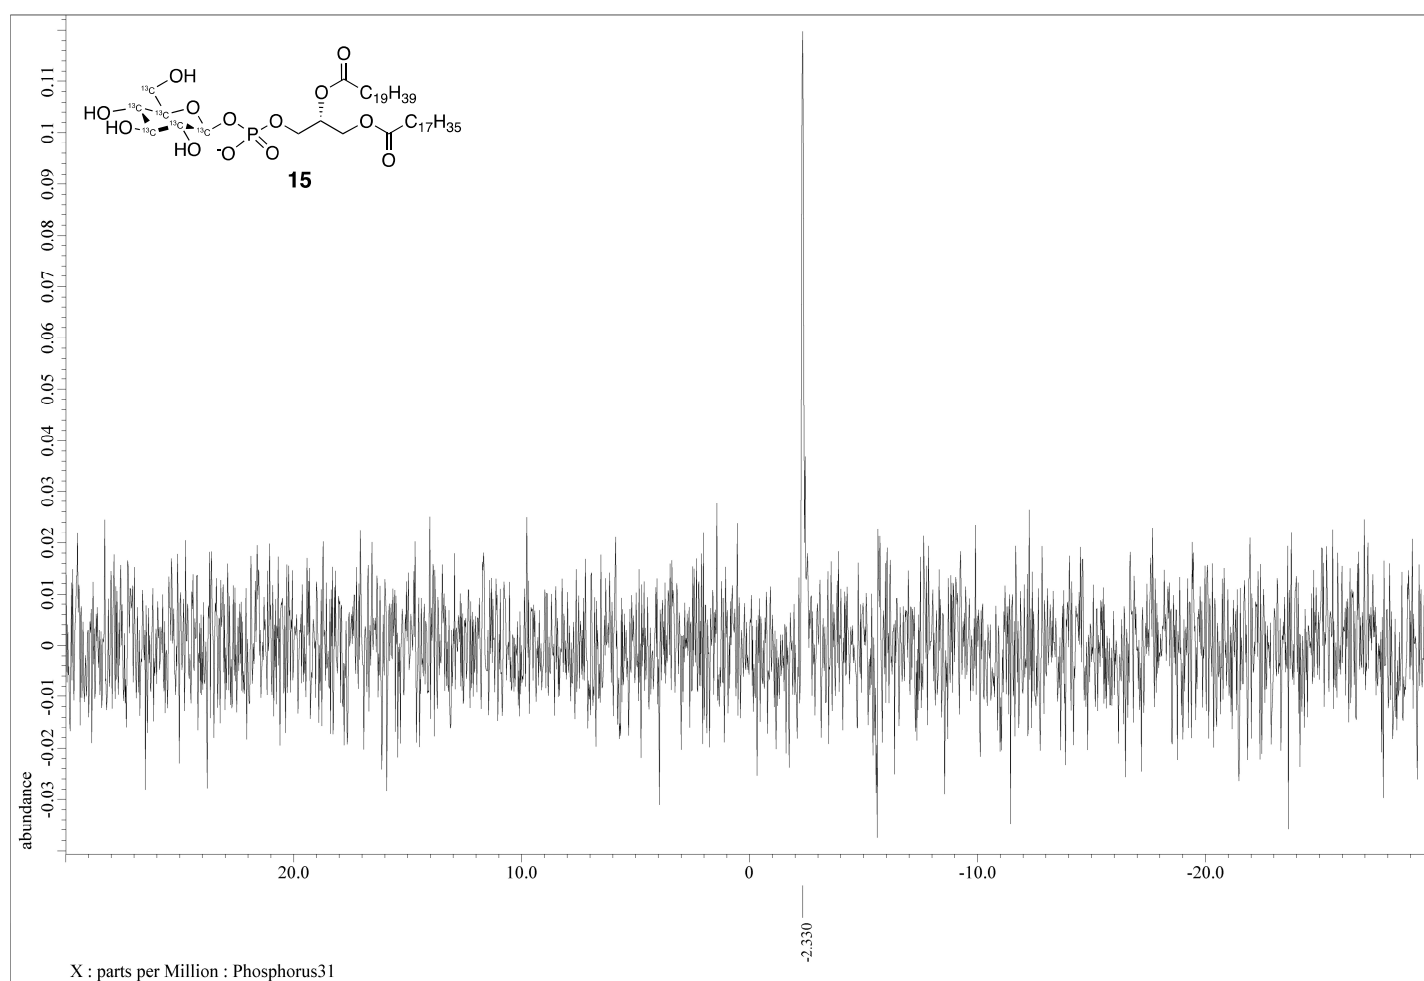

Supplement: d2ob02173k2.pdf [file d2ob02173k2.pdf]
