# Supplementary material for: Protecting-group-free glycosylation of phosphatidic acid in aqueous media
Source: Royal Society of Chemistry journal article supplement (doi:10.1039/d2ob02173k), 2023-01-01

600 MHz  $^1\text{H}$ - NMR in  $\text{CDCl}_3/\text{CD}_3\text{OD}(2/1)$

Eluted from LH20 column  
( $\text{CDCl}_3/\text{CD}_3\text{OD}(1/1)$  in 1% TEA)

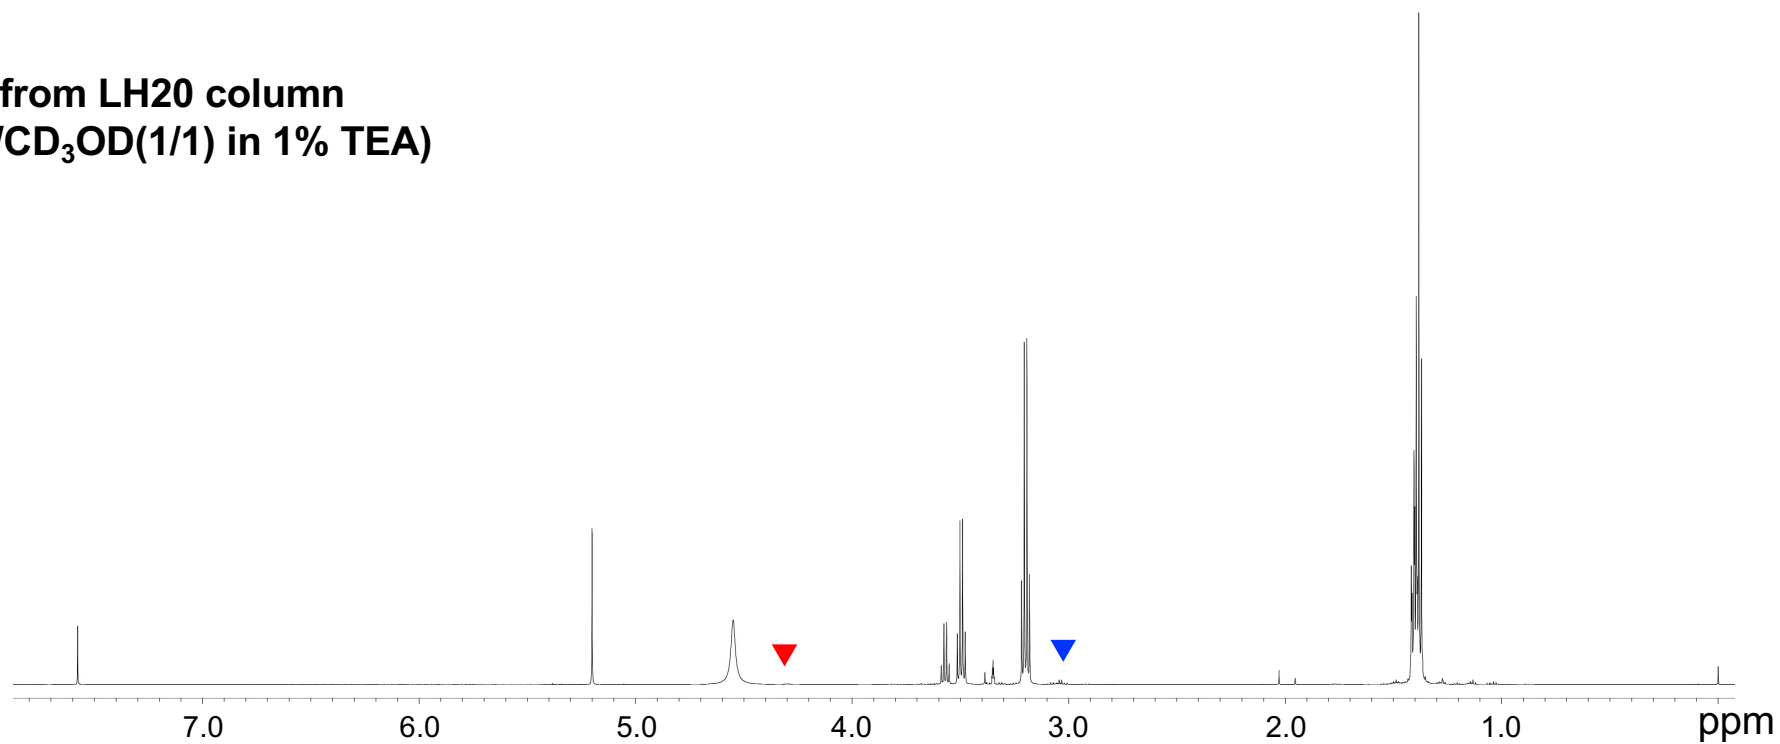

PtdGlc (16:0, 16:0)

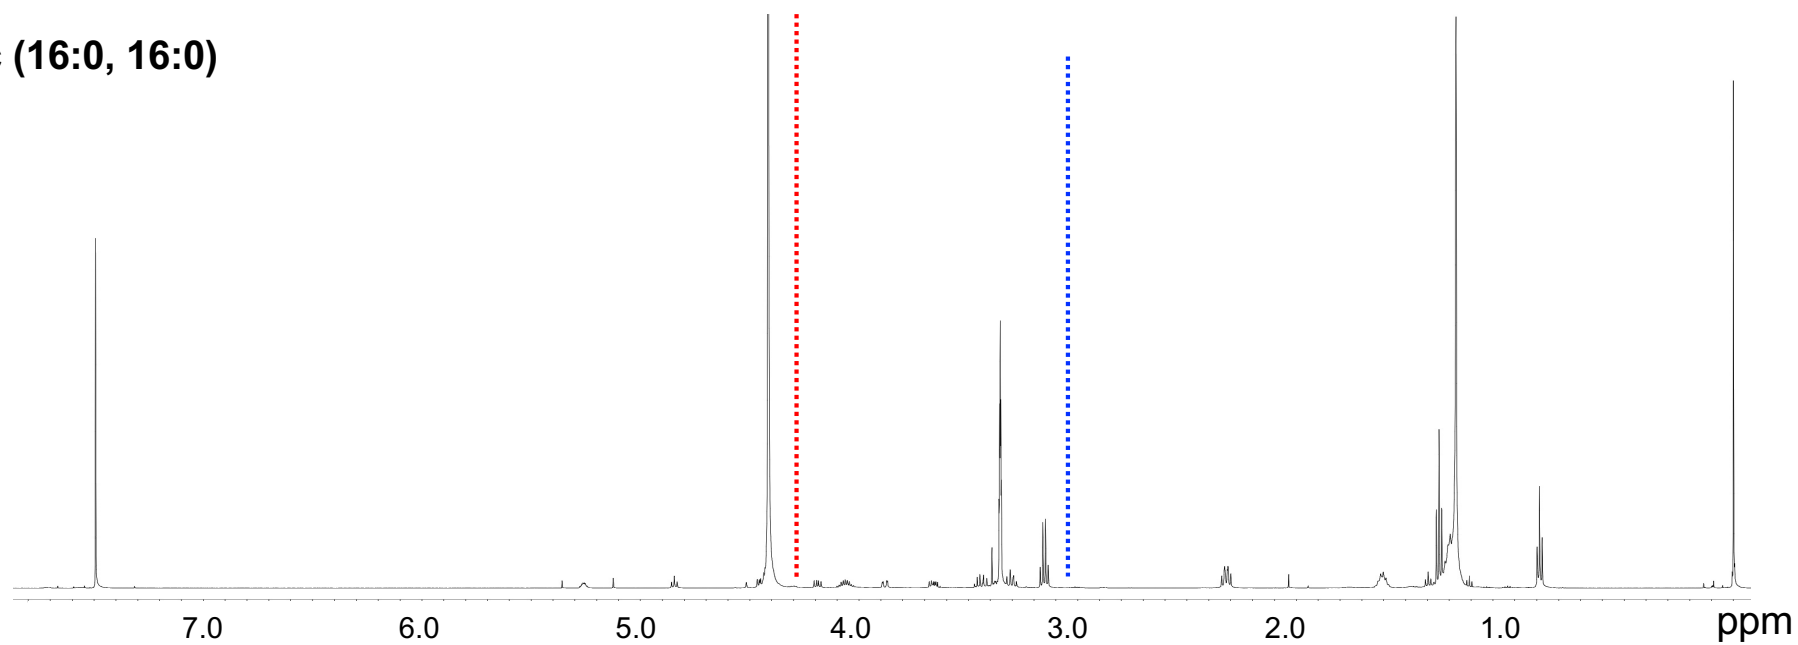

Eluted from LH20 column  
(CDCl<sub>3</sub>/CD<sub>3</sub>OD(1/1) in 1% TEA)

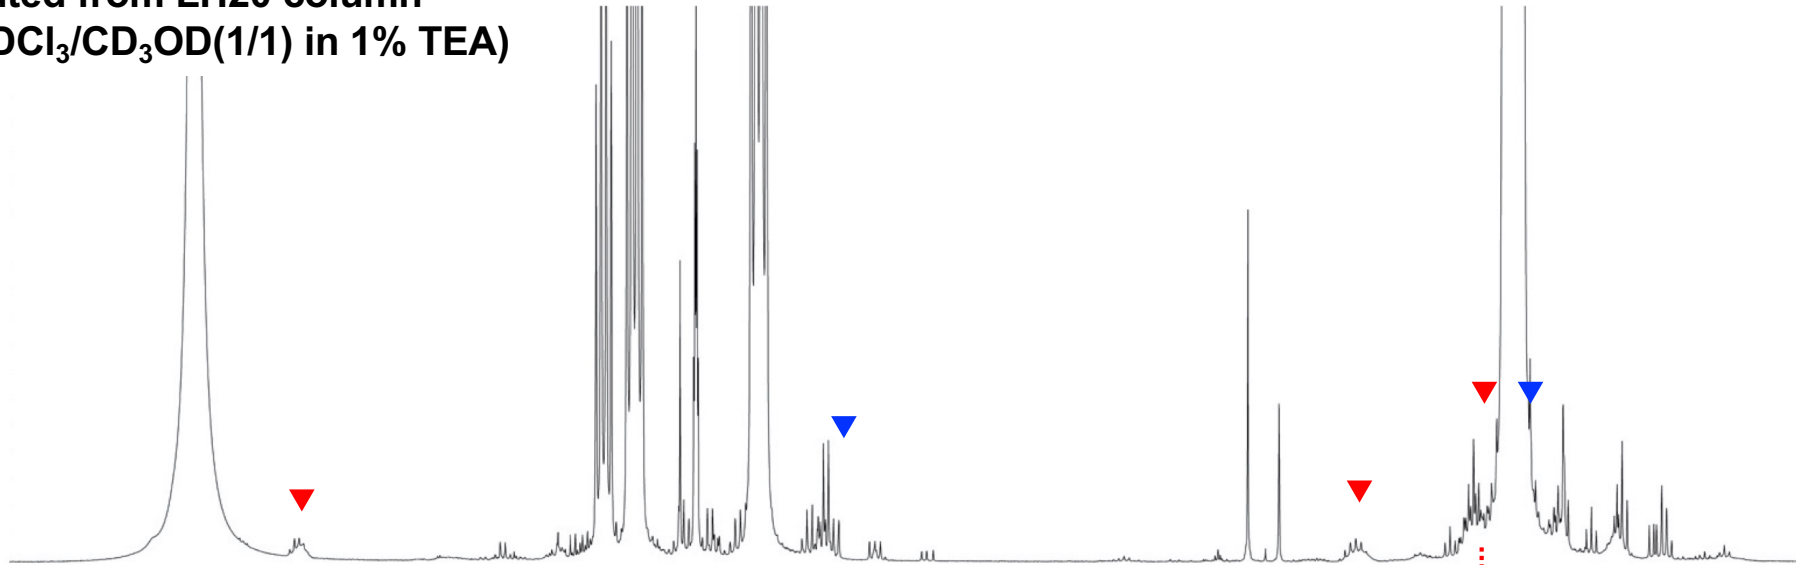

PtdGlc (16:0, 16:0)

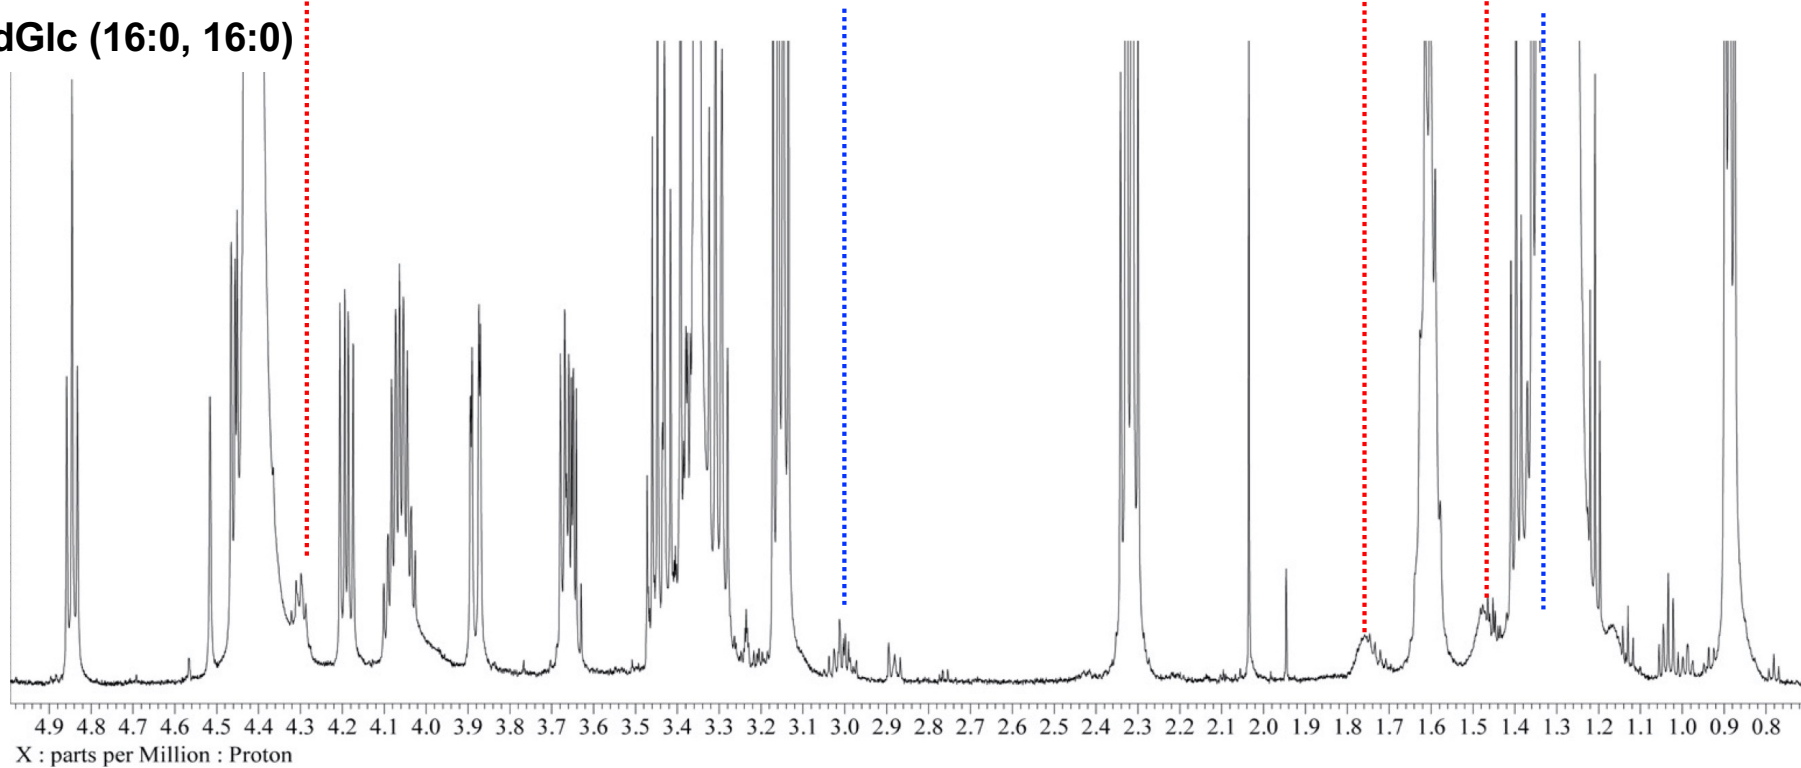

H-H cosy spectra (CDCl<sub>3</sub>/CD<sub>3</sub>OD(2/1))

Eluted from LH20 column  
(CDCl<sub>3</sub>/CD<sub>3</sub>OD(1/1) in 1% TEA)

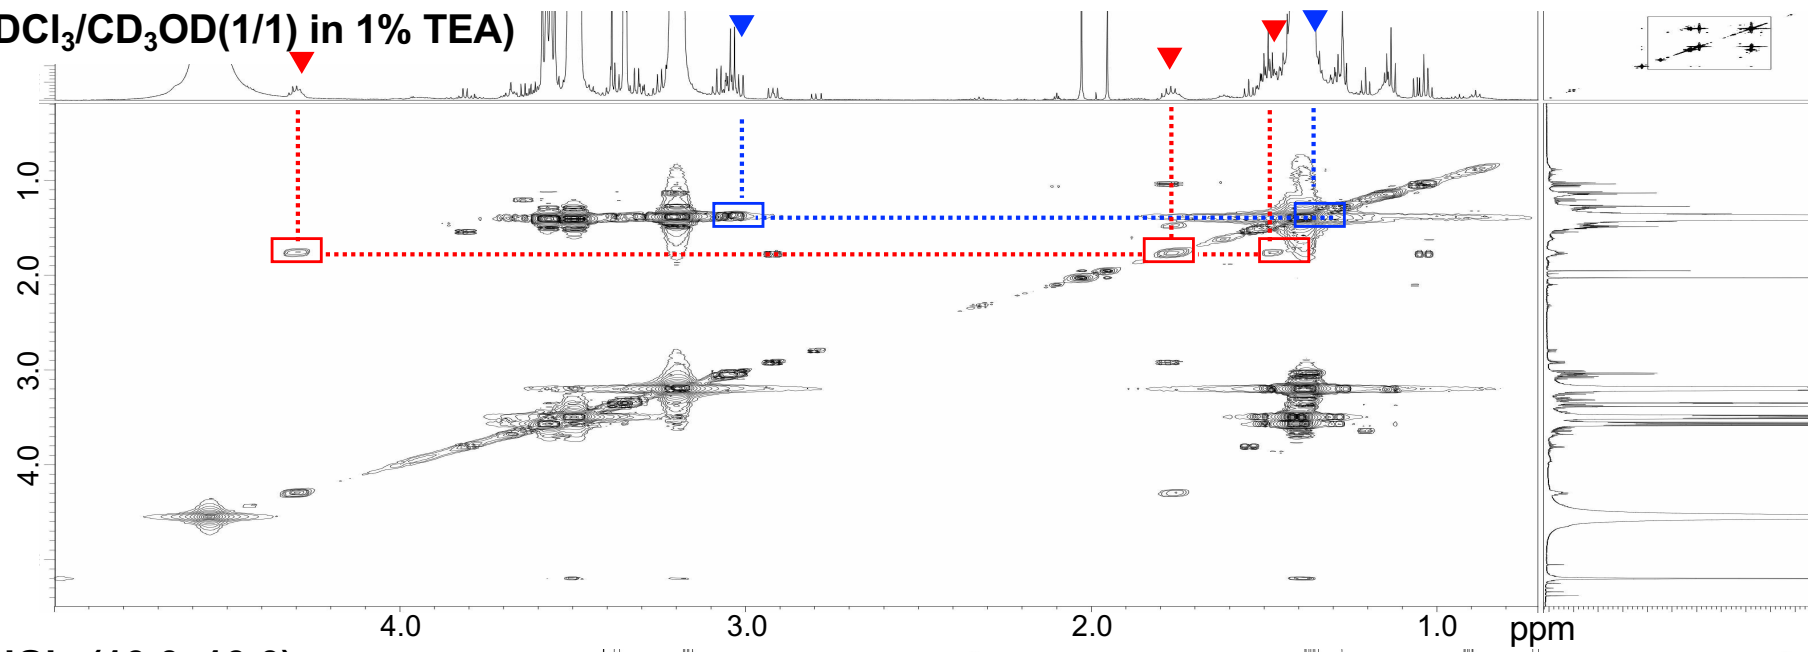

PtdGlc (16:0, 16:0)

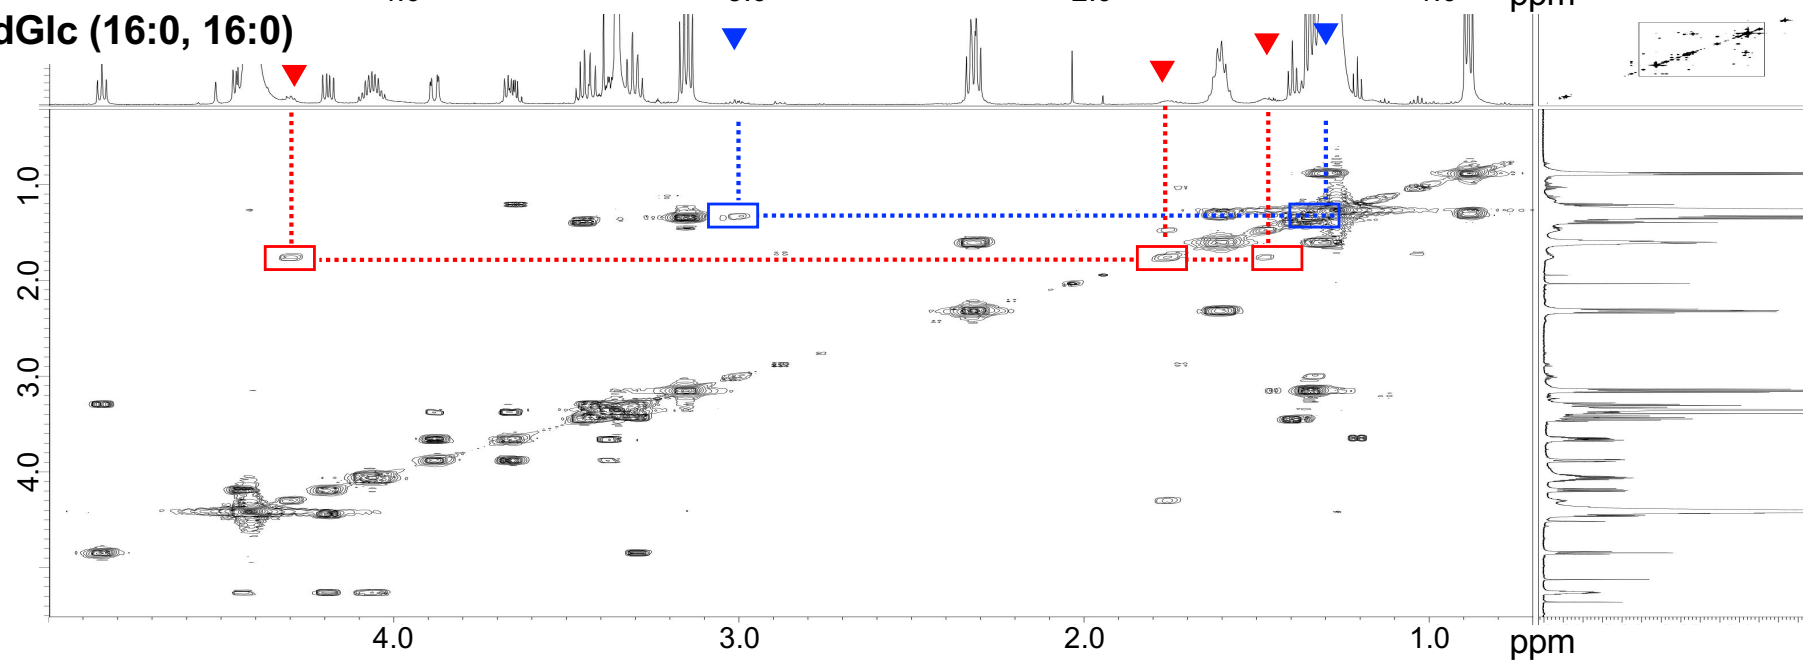

Supplement: d2ob02173k1.pdf [file d2ob02173k1.pdf]
